1                   **Impact of prior and projected climate change on US Lyme disease incidence**

2  
3  
4 Lisa I. Couper<sup>1</sup>, Andrew J. MacDonald<sup>2,3</sup>, Erin A. Mordecai<sup>1</sup>

5  
6  
7 **Author affiliations:**

8 1. Department of Biology, Stanford University, Stanford, California

9 2. Earth Research Institute, University of California, Santa Barbara, California

10 3. Bren School of Environmental Science and Management, University of California, Santa  
11 Barbara, California

12  
13  
14 **Corresponding author:**

15 Lisa Couper

16 [lcouper@stanford.edu](mailto:lcouper@stanford.edu)

17 327 Campus Drive, Stanford, CA 94305

18  
19  
20 *The authors declare they have no actual or potential competing financial interests.*

21  
22  
23  
24  
25  
26  
27  
28  
29  
30  
31  
32  
33  
34  
35  
36  
37  
38  
39  
40  
41  
42  
43  
44  
45  
46

47 **Abstract**

48 Lyme disease is the most common vector-borne disease in temperate zones and a growing public  
49 health threat in the United States (US). The life cycles of the tick vectors and spirochete  
50 pathogen are highly sensitive to climate, but determining the impact of climate change on Lyme  
51 disease burden has been challenging due to the complex ecology of the disease and the presence  
52 of multiple, interacting drivers of transmission. Here we incorporated 18 years of annual, county-  
53 level Lyme disease case data in a panel data statistical model to investigate prior effects of  
54 climate variation on disease incidence while controlling for other putative drivers. We then used  
55 these climate-disease relationships to project Lyme disease cases using CMIP5 global climate  
56 models and two potential climate scenarios (RCP4.5 and RCP8.5). We find that interannual  
57 variation in Lyme disease incidence is associated with climate variation in all US regions  
58 encompassing the range of the primary vector species. In all regions, the climate predictors  
59 explained less of the variation in Lyme disease incidence than unobserved county-level  
60 heterogeneity, but the strongest climate-disease association detected was between warming  
61 annual temperatures and increasing incidence in the Northeast. Lyme disease projections indicate  
62 that cases in the Northeast will increase significantly by 2050 ( $23,619 \pm 21,607$  additional cases),  
63 but only under RCP8.5, and with large uncertainty around this projected increase. Significant  
64 case changes are not projected for any other region under either climate scenario. The results  
65 demonstrate a regionally variable and nuanced relationship between climate change and Lyme  
66 disease, indicating possible nonlinear responses of vector ticks and transmission dynamics to  
67 projected climate change. Moreover, our results highlight the need for improved preparedness  
68 and public health interventions in endemic regions to minimize the impact of further climate  
69 change-induced increases in Lyme disease burden.

70

71 **Keywords:** Lyme disease, climate change, *Ixodes scapularis*, *Ixodes pacificus*, least squares  
72 dummy variables, disease projections

73

74

75

76

77

## 78 **Introduction**

79 Arthropod-transmitted pathogens pose a severe and growing threat to global public health  
80 (World Health Organization 2014). Because vector life cycles and disease transmission are  
81 highly sensitive to abiotic conditions (Mattingly 1969, Sonenshine and Roe 2013), climate  
82 change is expected to alter the magnitude and geographic distribution of vector-borne diseases  
83 (Kilpatrick and Randolph 2012, World Health Organization 2014). Climatic changes, in  
84 particular warming temperatures, have already facilitated expansion of several vector species  
85 (e.g., Purse et al. 2005, González et al. 2010, Roiz et al. 2011, Clow et al. 2017a), and have been  
86 associated with increased vector-borne disease incidence (e.g., Loevinsohn 1994, Subak 2003,  
87 Hii et al. 2009). Identifying areas of high risk for current and future vector-borne disease  
88 transmission under climate change is critical for mitigating disease burden. However, the  
89 presence of interacting drivers of disease transmission such as land use change and globalization,  
90 and the complex ecology of vector-borne diseases make the effort to measure and predict effects  
91 of climate on vector-borne disease incidence challenging (Rogers and Randolph 2006,  
92 Tabachnick 2010, Mills et al. 2010, Ostfeld and Brunner 2015, Lafferty and Mordecai 2016).

93 This challenge is particularly apparent in the case of Lyme disease, the most common  
94 vector-borne disease in temperate zones (Kurtenbach et al. 2006, Rizzoli et al. 2011, Rosenberg  
95 et al. 2018), because transmission depends on a complex sequence of biotic interactions between  
96 vector and numerous host species that may respond differently to environmental change (Ostfeld  
97 1997). In the United States (US), Lyme disease is caused by the bacteria *Borrelia burgdorferi*,  
98 and is vectored by two tick species: *Ixodes scapularis* in the eastern and midwestern US and  
99 *Ixodes pacificus* in the western US. After hatching from eggs, both tick species have three  
100 developmental stages—larva, nymph, and adult—during which they take a single blood meal  
101 from a wide range of vertebrate hosts before transitioning to the next developmental stage or  
102 reproducing (Sonenshine and Roe 2013). This life cycle takes 2-3 years to complete, 95% of  
103 which is spent at or below the ground surface in diapause, seeking a host, digesting a blood meal,  
104 or molting (i.e., off the host) (Sonenshine and Roe 2013, Ostfeld and Brunner 2015).

105 Given their long life spans, ectothermic physiology, and high degree of interaction with  
106 the physical environment, tick life cycles are sensitive to changes in climate and weather  
107 conditions (Sonenshine and Roe 2013). Prior research has demonstrated that temperature and  
108 moisture strongly influence tick mortality, development, and host-seeking abilities (reviewed in

109 Ostfeld and Brunner 2015, Ogden and Lindsay 2016). In particular, both low and high  
110 temperatures decrease *I. scapularis* and *I. pacificus* survival and host-seeking activity (Lindsay et  
111 al. 1995, Vandyk et al. 1996, Padgett and Lane 2001). Further, cool temperatures prolong tick  
112 development and increase generation times, leading to greater proportional mortality before  
113 reproduction (Peavey and Lane 1996, Ogden et al. 2004, 2006). Rainfall and moisture  
114 availability also influence host-seeking activity in nonlinear ways. Low humidity exposure  
115 substantially increases tick mortality and inhibits host-seeking activity (Stafford 1994, Lane et al.  
116 1995, Vail and Smith 1998, Schulze et al. 2001, Rodgers et al. 2007, Nieto et al. 2010, Ginsberg  
117 et al. 2017, MacDonald et al. 2019b). To avoid desiccating conditions, Ixodid ticks often modify  
118 their questing behavior to remain closer to the moist vegetative surface, or return frequently to  
119 rehydrate, both of which decrease the probability of obtaining a blood meal and thereby limiting  
120 survival and reproduction (Randolph and Storey 1999, Prusinski et al. 2006, Sonenshine and Roe  
121 2013, Arsnoe et al. 2015, McClure and Diuk-Wasser 2019). However, heavy rainfall may also  
122 directly impede tick host-seeking (Randolph 1997). Given these physiological relationships,  
123 temperature and precipitation are important predictors of these tick species' latitudinal and  
124 altitudinal range limits (McEnroe 1977, Estrada-Peña 2002, Brownstein et al. 2003, Ogden et al.  
125 2005, Leighton et al. 2012, Berger et al. 2014, Eisen et al. 2016, Hahn et al. 2016), and  
126 northward range expansion of *I. scapularis* has been associated with warming temperature  
127 (Ogden et al. 2014b, Clow et al. 2017b, 2017a).

128         Yet despite well-known physiological relationships between specific climate variables  
129 and aspects of tick biology, and strong evidence of relationships between climate and tick range  
130 limits, it remains unclear how these effects translate into Lyme disease incidence - the outcome  
131 of interest to public health - and how broadly they apply across biogeographically distinct US  
132 regions. However, associations between climate and Lyme disease incidence are difficult to  
133 measure given the influence of many non-climate factors such as changing physician awareness,  
134 host movement, and human behavior (Morshed et al. 2006, Randolph 2010, Ostfeld and Brunner  
135 2015, Kilpatrick et al. 2017, Scott and Scott 2018). A handful of prior studies have attempted to  
136 isolate the effect of climate on incidence, but have been limited in geographic or temporal scope,  
137 and/or not controlled for confounding drivers of incidence, leading to conflicting results about  
138 the role of climate change on transmission (Subak 2003, McCabe and Bunnell 2004, Schaubert et

139 al. 2005, Burtis et al. 2016, Dumic and Severnini 2018). As a result, our ability to predict effects  
140 of future climate change on Lyme disease incidence remains limited.

141 Here, we leverage an 18-year county-level Lyme disease case reporting dataset and  
142 explicitly control for other drivers of disease burden to ask: How has interannual variation in  
143 climate conditions contributed to past changes in Lyme disease incidence across distinct US  
144 regions? We include climate variables capturing changes in temperature and precipitation  
145 conditions and investigate how relationships between climate and Lyme disease outcomes vary  
146 across different regions of the US (i.e., the Northeast, Midwest, Southeast, Southwest, Pacific  
147 Southwest, and Pacific). We hypothesize that: a) warmer temperatures in northern regions and b)  
148 spring precipitation in all regions promote tick survival and therefore increase Lyme disease  
149 incidence, while c) hot, dry conditions during the questing period decrease tick host-seeking  
150 activity, survival and disease incidence. To avoid drawing spurious conclusions about the effects  
151 of climate, we analyze the effects of other known and potential drivers of disease incidence such  
152 as changing forest cover, public awareness of tick-borne disease, and health-seeking behavior,  
153 and use a statistical approach that explicitly accounts for unobserved heterogeneity in disease  
154 incidence between counties and years. We then use these modeled, regionally-specific  
155 relationships between climate and Lyme disease burden to investigate projected changes in US  
156 Lyme disease incidence under future climate scenarios. We report the projected change in Lyme  
157 disease incidence for individual US regions in 2040 – 2050 and 2090 – 2100 relative to  
158 hindcasted 2010 – 2020 levels under two potential climate scenarios: RCP8.5, which reflects the  
159 upper range of the literature on emissions, and RCP4.5, which reflects a moderate mitigation  
160 scenario (Hayhoe et al. 2017).

161

## 162 **Materials and Methods**

### 163 **Lyme disease case data**

164 We obtained annual, county-level reports of Lyme disease cases spanning from 2000 to 2017  
165 from the US Centers for Disease Control and Prevention (CDC) (see Supporting Information).  
166 These disease case data provide the most spatially-resolved, publicly available surveillance data  
167 in the US. Raw case counts were converted to incidence using annual county population sizes  
168 from the US Census Bureau (USCB) and were expressed in cases per 100,000 people.

## 169 **Climate data**

170 An overwhelming number of climate variables, such as the mean, range, and maximum or  
171 minimum temperature or precipitation at different time scales, could conceivably affect Lyme  
172 disease transmission. To reduce the probability of identifying significant but spurious  
173 relationships between climate and incidence, we limited the variables considered here to: average  
174 winter temperature lagged 1.5 years; average spring precipitation; the number of hot, dry days in  
175 May – July (the nymphal tick questing period); cumulative average temperature; total annual  
176 precipitation; daily temperature variability; and daily precipitation variability (Table 1). These  
177 variables have either been previously associated with variation in Lyme disease incidence, tick  
178 range limits or abundance, or, in the case of daily temperature and precipitation variability, are  
179 grounded in physiological relationships between climate and tick life history but have not been  
180 previously tested. In particular, interannual variation in Lyme disease incidence in endemic  
181 regions has been positively associated with lagged average winter temperature (Subak 2003),  
182 average spring precipitation (McCabe and Bunnell 2004), and negatively associated with the  
183 number of hot, dry days in May – July (Burtis et al. 2016). A measure of cumulative annual  
184 temperature (degree days > 0°C) has been associated with *I. scapularis* population establishment  
185 and abundance (Jones and Kitron 2000, Ogden et al. 2004, 2006, Clow et al. 2017b), and  
186 cumulative annual precipitation has been associated with larval tick abundance (Jones and Kitron  
187 2000). Frequent variation in temperature can decrease tick survival due to the energetic costs of  
188 adapting to changing conditions (Gigon 1985, Herrmann and Gern 2013), thus daily temperature  
189 and precipitation variability were included here to explore whether this effect scaled to affect  
190 transmission risk. Details about how these variables were calculated and further justification for  
191 their biological relevance are listed in Table 1.

192 For past climate conditions, we obtained daily, county-level average temperature and  
193 total precipitation data from the National Oceanic and Atmospheric Administration (NOAA)  
194 weather stations accessed via the CDC’s Wide-ranging Online Data for Epidemiological  
195 Research (WONDER) database. To estimate future climate variables, we used NASA Goddard  
196 Institute for Space Studies CMIP5 data on modeled temperature and precipitation (Schmidt et al.  
197 2014). Specifically, we obtained estimates of daily near-surface air temperature and precipitation  
198 through 2100 under the upper climate change scenario (RCP8.5) and a moderate climate change  
199 scenario (RCP4.5) (van Vuuren et al. 2011, Taylor et al. 2012). These climate scenarios are

200 relatively similar in the radiative forcing levels assumed through 2050 but diverge substantially  
201 in the latter half of the century. Climate estimates from these two scenarios are provided at a 2° x  
202 2.5° resolution; values were then ascribed to counties based on county latitude and longitude (see  
203 Figure S1). Mean values for hindcasted and projected climate variables for each region are listed  
204 in Table S1.

205

## 206 **Awareness data**

207 We controlled for variation in public awareness of ticks and Lyme disease using data from  
208 Google trends on the frequency of “ticks” as a search term. We obtained data on “ticks” search  
209 frequency, normalized for a given location and year, for 2004 (the first year the data were  
210 available) to 2017. We also initially used “tick bite”, and “Lyme disease” as search terms, but  
211 found that these generated nearly identical coefficient estimates, thus we proceeded to use only  
212 the “ticks” search term as a predictor. Search frequency data were aggregated at the designated  
213 market area (DMA), the smallest spatial scale available. Search frequency values for a given  
214 DMA, which contained an average of 14 counties, were applied equally to all counties therein.  
215 We used a 1-year lagged version of the tick search variable, as awareness of tick-borne disease is  
216 likely endogenous to incidence (i.e., higher Lyme disease incidence likely contributes to higher  
217 tick search frequency and awareness) and using predetermined values reduces endogeneity  
218 concerns (Bascle 2008).

219

## 220 **Health-seeking behavior data**

221 We explicitly controlled for variation in health-seeking behavior, previously posited as a driver  
222 of Lyme disease reporting (Armstrong et al. 2001, Wilking and Stark 2014) by including health  
223 insurance coverage and poverty as potential predictors. Given the logistical and financial  
224 challenges in obtaining a Lyme disease diagnosis and treatment (Johnson et al. 2011, Adrion et  
225 al. 2015), access to health care services may play a role in whether a Lyme disease case is  
226 identified and reported. We obtained data on health insurance coverage, defined as the percent of  
227 county residents with any form of health insurance coverage in a given year, for 2005 to 2017  
228 from USCB’s Small Area Health Insurance Estimates (SAHIE) program. We obtained data on  
229 poverty, defined as the percent of county residents living in poverty in a given year, for 2000 to  
230 2017 from the USCB.

231

## 232 **Land cover data**

233 We included two land cover variables putatively associated with higher tick-borne disease risk:  
234 the percent forest in a given county and year, and the percent mixed development (Brownstein et  
235 al. 2005b, Dister and Fish 1997, Frank et al. 1998, Glass et al. 1995, Killilea et al. 2008,  
236 MacDonald et al. 2019a). We calculated these variables using 30-m resolution land cover data  
237 from the US Geological Survey (USGS) National Land Cover Database (NLCD) (Yang et al.  
238 2018). Percent forest included any deciduous, evergreen, or mixed forest. Mixed development  
239 was defined as areas with a mixture of constructed materials and vegetation, including lawn  
240 grasses, parks, golf courses, and vegetation planted in developed settings. We calculated county-  
241 level values of these land cover variables for 2001, 2004, 2006, 2008, 2011, 2013, and 2016 as  
242 these are the only years the NLCD dataset is currently available.

243 To estimate future land cover variables, we used land cover projections generated by the  
244 USGS Earth Resources Observation and Science Center (EROS) using the IPCC Special Report  
245 on Emissions Scenarios (SRES) (Sohl et al. 2014). Although newer socioeconomic pathways  
246 have recently been developed (i.e., the “Shared Socioeconomic Pathways”), these scenarios have  
247 not yet been incorporated into US land cover projections (Sohl 2019). We used modeled land  
248 cover data under SRES B1, which reflects lower urban development, to align with the moderate  
249 climate change scenario (RCP4.5), and SRES A1B, which reflects higher urban development and  
250 conversion of natural lands, to align with the upper climate change scenario (RCP8.5)  
251 (Nakicenovic et al. 2000, Rogelj et al. 2012, Sohl et al. 2014). Using these data, we again  
252 calculated annual, county-level values of percent forest cover and mixed development for 2040 –  
253 2050 and 2090 – 2100. However, as the ‘mixed development’ land cover class was not included  
254 in the projected data, we instead used the ‘mechanically disturbed’ public or private land cover  
255 class (see Supporting Information).

256

## 257 **Regional divisions**

258 Given the large variation in climatic conditions across the US, as well as variation in ecological  
259 dynamics of tick-borne diseases such as tick species identity, tick densities, tick questing  
260 behavior, and host community composition (Eisen et al. 2016, Kilpatrick et al. 2017, Ostfeld  
261 1997, Salkeld and Lane 2010), we examined regional differences in climate-disease



262 relationships. We used the US Fish & Wildlife Service regional boundaries to divide the US into  
263 the following seven regions for analysis: Northeast, Midwest, Mountain Prairie, Pacific, Pacific  
264 Southwest, Southwest, and Southeast (Figure 1). These regional divisions were selected as they  
265 roughly correspond to genetic structuring of *I. scapularis* and *I. pacificus* (Kain et al. 1997, 1999,  
266 Humphrey et al. 2010) and are likely distinct in environmental conditions and resources (Ricketts  
267 et al. 1999, Smith et al. 2018). These regional divisions are also similar to the nine ‘climatically  
268 consistent’ regions within the contiguous US identified by NOAA (Karl and Kloss 1984) but  
269 preserve larger regions in the South and Midwest to obtain higher power in the analysis. Further,  
270 each region contains only one vector species: *I. scapularis* in the Northeast, Midwest, Southeast,  
271 and Southwest, and *I. pacificus* in the Pacific and Pacific Southwest (Dennis et al. 1998). As  
272 neither species has an established presence in the Mountain Prairie, this region was removed  
273 from the analysis. Regional descriptions, including the population size (as of 2017), the number  
274 of counties, and the average climate conditions, are provided in Table S2.

275

## 276 **Statistical analysis**

277 We used a least squares dummy variable (termed “fixed-effects” in econometrics) regression  
278 approach to estimate changes in Lyme disease incidence using repeated observations of the same  
279 groups (counties) from 2000 – 2017 (Larsen et al. 2019). This class of statistical approaches has  
280 been developed to isolate potential causal relationships in the absence of randomized  
281 experiments where such experiments are not feasible (Larsen et al. 2019, MacDonald and  
282 Mordecai 2019). We included ‘county’ and ‘year’ dummy variables to control for any  
283 unobserved heterogeneity that may influence reported Lyme disease incidence in a particular  
284 county across all years (e.g., geographic features, number of health care providers), or influence  
285 Lyme disease in all counties in a given year (e.g., changes in disease case definition),  
286 respectively. All counties (n = 2,232) for which there were complete data on Lyme disease cases,  
287 climate, and other predictors were included.

288 To account for regional variation in the predictors of tick-borne disease incidence  
289 (Wimberly et al. 2008, Raghavan et al. 2014), we ran separate models for each US region (see  
290 Methods: Regional divisions). We used stepwise variable selection, in which variables were  
291 added if they reduced model Akaike information criterion (AIC) by two or more, to identify the  
292 climate, land cover, and non-ecological predictors that best explained Lyme disease incidence in

293 each region (Yamashita et al. 2007, Zhang 2016). We assessed the multicollinearity of these  
294 models by calculating the variance inflation factor (VIF). No predictors had VIF values greater  
295 than 10 after the stepwise variable selection procedure, thus we did not remove any variables  
296 from the final models due to high collinearity (Hair et al. 2014).

297 We accounted for spatial and temporal autocorrelation of model errors by using cluster-  
298 robust standard errors. This nonparametric approach accounts for arbitrary forms of  
299 autocorrelation within a defined “cluster” to avoid misleadingly small standard errors and test  
300 statistics (Cameron and Miller 2015). We specified clusters as US Agricultural Statistics  
301 Districts (ASDs), which contain on average  $9.9 \pm 5.2$  counties. These districts contain contiguous  
302 counties grouped by similarities in soil type, terrain, and climate such that each district is more  
303 homogenous with respect to these characteristics than the state as a whole (USDA 2018).  
304 Accounting for spatial and temporal correlation in this way may help to account for ecological  
305 similarities between neighboring counties not captured in the climate and land cover predictors.  
306 Along these lines, ASDs have previously been used to account for spatial autocorrelation when  
307 investigating relationships between forest fragmentation and Lyme disease incidence at the  
308 county-level (MacDonald et al. 2019a). When reporting on the significance of a predictor, we  
309 use standard errors and p-values calculated using this correction. To ensure our results were  
310 robust to cluster specification, we repeated the model runs using county as the cluster unit (Table  
311 S3). All analyses were conducted in R version 3.6 (R Core Team 2017)

312 To capture any nonlinear relationships between climate predictors and Lyme disease  
313 incidence, we generated models using linear and quadratic versions of the climate variables as  
314 potential predictors. Specifically, we used the stepwise variable selection approach starting with  
315 linear and quadratic versions of each climate variable to determine the best fit model for each  
316 region. We compare model accuracy and the output of these models to those using only linear  
317 versions of climate predictors to assess the sensitivity of our results to the functional form of  
318 climate-disease relationships (see Methods: Model validation).

319

### 320 **Lyme disease projections**

321 We projected Lyme disease incidence using the climate and land cover variables included in the  
322 best fit model for each region as well as a county dummy variable. Tick search frequency,  
323 poverty, and health insurance coverage were not included because annual, county-level

324 projections for these variables are unavailable. Using these models, we obtained regional  
325 estimates for Lyme disease incidence under the upper and moderate climate change scenarios  
326 (RCP8.5 and RCP4.5) for 2040 – 2050 and 2090 – 2100. We calculated county-level changes in  
327 Lyme disease incidence by subtracting modeled incidence for 2010 – 2020 from projected  
328 incidence. Using modeled incidence for 2010 – 2020, rather than true case data for the years it  
329 was available, allowed for more direct comparisons between prior and projected cases because  
330 these estimates were made using the same climate and land cover data.

331 We converted projected Lyme disease incidence to cases under two differing assumptions  
332 about county population sizes. In the first calculation, we account for projected population  
333 growth by using county-level population projections under the Shared Socioeconomic Pathway  
334 “Middle of the Road” scenario (SSP2) as generated by Hauer 2019 (Samir and Lutz 2017). In the  
335 second, we assume that county population sizes remained the same as those in 2017, the last year  
336 of available county-level Lyme disease case reports. We focus our results and discussion on the  
337 projections made using population size projections, but compare results from these two  
338 approaches to ensure that changes in projected Lyme disease case counts resulted from predicted  
339 changes in incidence rather than projected population growth or decline. We report point  
340 estimates and 95% prediction intervals when discussing projected changes in Lyme disease case  
341 counts.

342

### 343 **Model validation**

344 To evaluate predictive model accuracy, we compared hindcasted Lyme disease incidence under  
345 both emissions scenarios to observed values for 2008 – 2017 (Judge et al. 1985, Clark et al.  
346 2001). We compared model accuracy under varying model specifications to check the robustness  
347 of the climate-disease relationships. In the first specification, each regional model contained the  
348 predictors (climate, land cover, and non-ecological variables) determined through variable  
349 selection (see Methods: Statistical analysis) as well as county and year dummy variables. In the  
350 second specification, each regional model contained the same predictors as in the first  
351 specification, but only linear versions of the climate predictors were included. This is to assess  
352 the sensitivity of our results to the functional form of climate-disease relationships. Under the  
353 third specification, regional models contained the same climate and non-climate predictors as in  
354 the first specification but no dummy variables. Under the fourth specification, regional models

355 contained all possible climate and non-climate variables, and the county and year dummy  
356 variables. Using each of these specifications, we created models of Lyme disease incidence on a  
357 training dataset containing a randomly selected 75% subset of counties and years and used the  
358 withheld 25% of observations for validation (Hijmans 2012, Caldwell et al. 2016). To evaluate  
359 the performance of each model specification, we calculated the root-mean-square error (RMSE)  
360 and correlation coefficient between projected and observed Lyme disease incidence for a given  
361 county and year between 2008 – 2017 (the years with complete data for all predictors) for each  
362 regional model. We also compared estimated average annual incidence to observed average  
363 annual incidence for each model specification and each region. We used the modeled climate and  
364 land cover data when hindcasting as these datasets were used for Lyme disease projections.

365

## 366 **Results**

### 367 **Climate and Lyme disease incidence**

368 At least one climate variable was included in the best fit model of Lyme disease incidence for all  
369 US regions with vector species present (Table 2). However, the specific climate variable(s)  
370 included in the model varied between regions and were often not significant predictors of  
371 incidence. As hypothesized, cumulative temperature was a significant, positive predictor in the  
372 Northeast, while the number of hot, dry days in May - July was a significant, negative predictor  
373 in this region (Table 2). Hot, dry days was also a significant, negative predictor in the Midwest.  
374 In the Southeast, daily temperature variability was a significant, positive predictor of incidence.  
375 In all other regions, the temperature and/or precipitation variables included in the best fit models  
376 were not statistically significant predictors. Further, for all regions, the climate predictors  
377 explained relatively little of the variation in Lyme disease incidence compared to the county  
378 dummy variables (Table 2). In many cases, quadratic versions of climate predictors were  
379 included in the best fit model for a particular region, indicating nonlinearity in climate-disease  
380 relationships (Table 2). For example, the number of hot, dry days, total annual precipitation, and  
381 temperature variability were all nonlinear predictors in the best fit model for the Northeast.

382

### 383 **Non-climate predictors and Lyme disease incidence**

384 For all regions, the best fit model of Lyme disease incidence included the 1-year lagged tick  
385 search frequency as well one health-seeking predictor and/or a land cover variable (Table 2).

386 Lagged tick search frequency was a significant, positive predictor in the Northeast, and had  
387 regionally variable, and non-significant effects in other regions. Poverty was negatively  
388 associated with Lyme disease incidence in the Northeast, and positively associated with  
389 incidence in the Midwest and Southwest, but was not a significant predictor in any of these  
390 models. Health insurance coverage was a non-significant, negative predictor of Lyme disease in  
391 the Southeast. Forest cover was included in all regional models except the Southwest, but had  
392 regionally variable effects and was only a significant predictor in the Pacific. Mixed  
393 development cover was a positive predictor in the Southeast and Southwest, but only significant  
394 in the Southeast. The above non-climate predictors were included in each regional model of  
395 incidence along with county and year dummy variables. The majority of the variation in  
396 incidence for each region was explained by the county dummy variable (Table 2), indicating that  
397 there was a great deal of unobserved county-level heterogeneity driving Lyme disease incidence  
398 that was captured by the dummy variables. However, the estimated effect sizes of the predictors  
399 are the marginal effects of deviations from county- and year-means, meaning the total effect of a  
400 given variable, such as forest cover, may be larger if much of the variation is captured by the  
401 county fixed effects.

402

### 403 **Model Validation**

404 Under the main model specification, hindcasted Lyme disease incidence matched the observed  
405 values with reasonable accuracy in the high incidence regions (Table 3 and Figure S1). In the  
406 Northeast and Midwest, the correlations between estimated Lyme disease incidence for a given  
407 county and year and the observed incidence were 0.85 and 0.90, respectively. Model accuracy  
408 was lower in the Pacific, Pacific Southwest, Southwest, and Southeast, where incidence is much  
409 lower ( $r = 0.40, 0.26, 0.07, 0.32$ , respectively). However, the estimated annual average Lyme  
410 disease incidence (i.e., average incidence for a given region between 2008 – 2017) closely  
411 matched the observed annual average for all regions (Table 3). For each region, the estimated  
412 incidence was within 13% of the observed incidence, and was within 5% for the Northeast  
413 specifically.

414 Model accuracy also varied across the four model specifications (Table 3). In particular,  
415 model specifications with dummy variables outperformed (i.e., lower RMSE, higher correlation  
416 coefficients) those without. Models including only linear versions of climate predictors (i.e.,

417 model specification two) along with non-climate and dummy variables performed similarly to  
418 the main model specification but with slightly lower correlation coefficients and higher RMSE in  
419 the Northeast and Midwest, where the majority of cases occur. Coefficient estimates and Lyme  
420 disease projections using this model specification are shown in Tables S4 and S5. Models  
421 including all potential climate and non-climate predictors along with dummy variables had  
422 similar accuracy to the main model specification and model specification two (Table 3). The  
423 simpler, variable selection-based model specification using nonlinear climate predictors where  
424 selected was thus used for the remaining analysis to minimize overfitting and decrease  
425 transferability concerns (Allen and Fildes 2001, Wenger et al. 2011, Wenger and Olden 2012),  
426 and to achieve the greatest accuracy in high Lyme disease incidence regions.

427

### 428 **Projected Lyme disease incidence**

429 Under the upper climate change scenario (RCP8.5), the number of Lyme disease cases in the  
430 Northeast is projected to increase by  $23,619 \pm 21,607$  by 2040 – 2050 and  $61,776 \pm 27,578$  by  
431 2090 – 2100 (Figures 2 and 3, Table 4). Non-significant decreases in the Midwest and increases  
432 in the Southeast were also projected under this scenario, and minimal, non-significant changes  
433 were projected for other regions (Table 4). By contrast, under the moderate climate change  
434 scenario (RCP4.5), no regions were projected to significantly increase or decrease. Non-  
435 significant increases in the Midwest, and non-significant increases or decreases, depending on  
436 the decade, were projected for the Northeast, with minimal changes elsewhere. Given the  
437 regionally variable projections and the large prediction intervals around all point estimates, total  
438 US Lyme disease incidence is not projected to change significantly under either climate scenario  
439 by 2040 – 2050 or 2090 – 2100 (Table 4). These results indicate that future changes in US Lyme  
440 disease burden are highly uncertain, vary strongly by region, and will depend on the degree of  
441 future climate change.

442 These Lyme disease projections were qualitatively similar to those generated using only  
443 linear versions of the climate variables (Table S5). Under this model specification (model  
444 specification two, see Methods: Model validation), the number of Lyme disease cases in the  
445 Northeast is projected to increase under the upper climate change scenario ( $21,467 \pm 21,354$  by  
446 2040 – 2050 and  $42,538 \pm 24,129$  by 2090 – 2100), but not under the moderate climate scenario.  
447 Non-significant decreases and increases in the Midwest were projected for the upper and

448 moderate climate scenario, respectively, and non-significant changes in the US as a whole were  
449 projected under both scenarios and time periods. These results are all consistent with those  
450 generated under the main model specification, indicating that our projections are generally robust  
451 to the functional form of climate-disease relationships specified in the model. The one qualitative  
452 difference in results is the significant increase in cases in the Southeast under the upper climate  
453 change scenario ( $1,522 \pm 1,213$  by 2040 – 2050 and  $3,460 \pm 1,736$  by 2090 – 2100) under model  
454 specification two, which was marginally non-significant under the main model specification.

455         Lyme disease case projections made using county-level population size projections were  
456 similar to those using constant (i.e., 2017) population sizes. In particular, large but uncertain  
457 increases in Lyme diseases cases were still projected for the Northeast under the upper climate  
458 change scenario ( $18,885 \pm 19,509$  by 2040 – 2050 and  $40,320 \pm 21,886$  by 2090 – 2100) when  
459 assuming constant population sizes. This indicates that our results are generally robust to  
460 population size assumptions and are not solely driven by projected changes in human  
461 demography. However, because population growth is projected for the Northeast (Hauer et al.  
462 2019; Table S7), projections made assuming constant population sizes are smaller (but not  
463 significantly) than those using projected population sizes.

464

## 465 **Discussion**

466 Given the increasing rate of vector-borne disease emergence and re-emergence in recent decades,  
467 including Zika in Central and South America and tick-borne encephalitis in Europe, identifying  
468 the environmental drivers of vector-borne disease transmission has been a major research theme  
469 (Rogers and Randolph 2006, Kilpatrick and Randolph 2012, Lafferty and Mordecai 2016, Swei  
470 et al. 2019). Extensive prior research indicates that temperature and moisture conditions can  
471 impact vector life cycles, activity patterns, abundance, and range limits (reviewed in Ogden and  
472 Lindsay 2016). Yet despite clear relationships between specific features of climate and aspects of  
473 vector life cycles and biology, identifying how these relationships translate to affect disease  
474 incidence has remained challenging. Here we use 18 years of disease and climate data in a panel  
475 data statistical modeling approach to identify the impacts of climate change on human Lyme  
476 disease incidence across biogeographically distinct US regions. We find that climate was a  
477 predictor of interannual variation in Lyme disease incidence in all US regions with established

478 vector species (Northeast, Midwest, Pacific, Pacific Southwest, Southwest, and Southeast), even  
479 after controlling for potentially confounding factors and spurious relationships spatially and  
480 temporally. However, the specific climate variable(s) that best predicted burdens varied between  
481 regions and had highly variable effect sizes and often nonlinear relationships with incidence.  
482 While these results underscore the complexity of climate-Lyme disease relationships, the specific  
483 associations observed here tended to reflect known relationships between climate and the life  
484 histories of the US vectors of Lyme disease, *I. scapularis* and *I. pacificus*.

485         The strongest climate-disease association detected was between warming annual  
486 temperatures and increasing Lyme disease incidence in the Northeast. Previous studies have  
487 found that warming year-round temperatures at high latitudes contribute to more rapid tick  
488 development rates, increased survival, and *I. scapularis* range expansion (Clow et al. 2017a,  
489 Leighton et al. 2012, Lindsay et al. 1995, Ogden et al. 2004, Rand et al. 2004). This suggests  
490 warmer temperatures near the ticks' northern range limit would promote Lyme disease  
491 transmission – an expectation empirically supported in this study. We also found a significant  
492 negative association between hot, dry conditions during the nymphal questing period (May –  
493 July) and incidence in the Northeast and Midwest. Prior studies indicate that desiccating  
494 conditions reduce tick questing activity, which can lead to decreased contact rates with larger  
495 vertebrate hosts, including humans (Randolph and Storey 1999, Prusinski et al. 2006, Sonenshine  
496 and Roe 2013). Further, Burtis et al. 2016 found the number of hot, dry days during this period  
497 was significantly negatively associated with *I. scapularis* questing density as well as Lyme  
498 disease incidence in the Hudson Valley, Southern New England, and northern New Jersey. Our  
499 work thus provides evidence that these prior relationships between desiccating conditions and  
500 tick questing behavior scale to incidence across the Northeast and Midwest. That this  
501 relationship was not observed or significant in the Southeast or Southwest is also consistent with  
502 prior evidence of differing questing behavior in northern and southern *I. scapularis* nymphs.  
503 Northern *I. scapularis* nymphs are much more likely to quest above the leaf litter, while southern  
504 *I. scapularis* nymphs primarily use habitats below the vegetative surface (Arsnoe et al. 2015). As  
505 this different questing behavior buffers southern *I. scapularis* from desiccating conditions,  
506 variation in the number of hot, dry days is less likely to impact tick-host contact rates and disease  
507 transmission here. Similar differences in questing behavior have been demonstrated between  
508 northern and southern population of *I. pacificus* (Lane et al. 2013, MacDonald and Briggs 2016),



509 but we find no significant relationship between hot, dry days and incidence in the Pacific,  
510 potentially because low Lyme disease incidence in this region reduces the power to detect effects  
511 of variation in climate on incidence. Although we did find the expected negative relationship  
512 between hot, dry days and incidence in the Northeast and Midwest, we did not detect the  
513 hypothesized positive relationship between spring precipitation and Lyme disease incidence in  
514 any region. We did find a positive association in the Northeast and Pacific Southwest, but the  
515 association was not significant, and it was negative (but non-significant) in the Midwest and  
516 Southwest. This may be due to counteracting effects of precipitation on human behavior leading  
517 to reduced tick-human contact rates (Jaenson et al. 2012), independent of effects of precipitation  
518 on tick host-seeking suitability.

519         The associations between climate conditions and Lyme disease incidence found here  
520 were detected while rigorously controlling for non-climate predictors of disease as well as  
521 unobserved predictors that covary with climate at the county and year levels. In particular, we  
522 explicitly controlled for variation in human awareness of ticks, land use and land cover  
523 characteristics, proxies for health-seeking behavior, and other unobserved heterogeneity between  
524 US counties and years in our modeling approach. Increasing tick awareness, as determined by  
525 the frequency of tick-related Google searches, was generally positively associated with Lyme  
526 disease incidence, while land cover and health-seeking behavior predictors had regionally  
527 variable relationships. By controlling for these effects, we provide strong evidence that the  
528 positive association between warming temperatures and Lyme disease incidence in the Northeast  
529 found in this study is not simply driven by increasing human awareness of tick-borne disease,  
530 temporal trends, or other concurrent changes as has been previously suggested (Morshed et al.  
531 2006, Randolph 2010, Scott and Scott 2018). Further, the total effects of climate and land use  
532 predictors may be larger than those estimated here, because these ecological predictors may  
533 underlie some of the variation included in the county and year dummy variables.

534         While our statistical models included both climate and non-climate predictors of Lyme  
535 disease incidence, model accuracy varied widely between regions. Most notably, model accuracy  
536 was substantially greater for endemic regions (Northeast and Midwest), compared to low  
537 incidence (non-endemic) regions (Pacific, Pacific Southwest, Southwest, and Southeast)  
538 (Ciesielski et al. 1988). The relatively poor predictive accuracy in non-endemic regions could be  
539 due to higher misdiagnosis rates and/or higher travel-associated Lyme disease transmission

540 (Eldin and Parola 2018, Parola and Paddock 2018) decoupling the relationship between local  
541 conditions and disease. However, evidence suggests that most Lyme disease transmission occurs  
542 in the peri-domestic environment, in which the county of transmission and reporting are likely to  
543 be the same (Falco and Fish 1988, Maupin et al. 1991, Jackson et al. 2006, Connally et al. 2009).  
544 The lower predictive accuracy in these regions more likely reflects a lack of sufficient annual  
545 variation in Lyme disease incidence needed to detect effects of climate in these regions above  
546 and beyond the county and year fixed effects, and/or weaker effects of climate conditions on  
547 Lyme disease transmission relative to confounding drivers not included in our model such as  
548 host movement and community composition. In contrast, the largest effect of climate on disease  
549 transmission is expected at the edges of the climate suitability for transmission (Githeko et al.  
550 2000). As portions of the Northeast and Midwest are near the *I. scapularis* northern range limit,  
551 the higher model accuracy here likely indicates stronger climate – Lyme disease relationships.  
552 Supporting this assertion, the climate predictors explained a relatively larger proportion of the  
553 variation in incidence in these regions.

554 Our Lyme disease projections, made using regionally-specific incidence models and  
555 projected climate and land cover data, suggest that climate change may lead to substantial  
556 increases in incidence in coming decades, but that these increases are largely concentrated in the  
557 Northeast, are highly uncertain, and depend upon the magnitude of climate change. In particular,  
558 under the upper climate change scenario (RCP8.5), Lyme disease cases in the Northeast are  
559 projected to increase by  $23,619 \pm 21,607$  by 2040 – 2050 and  $61,776 \pm 27,578$  by 2090 – 2100  
560 (Table 4). However, increases are not projected in the Northeast under the moderate climate  
561 change scenario (RCP4.5), nor for any other region under either scenario. Large increases in the  
562 Midwest under less severe warming are possible, as are large increases in total US cases under  
563 more severe warming, but these projections are non-significant. While the significant increase in  
564 Lyme disease cases projected for the Northeast under RCP8.5 was robust to alternative model  
565 specifications and assumptions about county-level population growth, the large prediction  
566 intervals around our point estimates for this region and all others indicate a wide range of  
567 potential disease outcomes under climate change.

568 These results indicate that climate change will likely contribute to increasing Lyme  
569 disease incidence in the Northeast, but the specific numerical projections should be interpreted  
570 with caution. While significant increases were projected in the Northeast, many other factors

571 contribute to Lyme disease transmission including host movement and community composition,  
572 and human avoidance behaviors (Ostfeld 1997, Brownstein et al. 2005b, Ogden et al. 2008,  
573 Brinkerhoff et al. 2011, Larsen et al. 2014, Berry et al. 2018, MacDonald et al. 2019a).  
574 Accordingly, we found that unobserved county-level heterogeneity, which would encompass  
575 these factors, was a predominant driver of incidence in each of our regional models. Thus, while  
576 climate may contribute to increasing Lyme disease incidence in northern regions, it may not be  
577 the dominant driver of future changes in Lyme disease. Further, while we examined the effects  
578 of two potential climate scenarios, uncertainty in these climate change projections was not  
579 incorporated into our predictive models and would contribute additional uncertainty in Lyme  
580 disease projections. Lastly, the projection models extrapolate from climate and disease  
581 relationships observed in the previous 18 years, assuming that these relationships can be  
582 extended to climate conditions not yet experienced. That is, we assume that the relationship  
583 between cumulative temperature, for example, and Lyme disease incidence in a given region will  
584 remain the same even as cumulative temperatures exceed prior values. This could generate  
585 inaccurate projections for regions near current tick upper thermal limits such as the Southeast  
586 and Southwest as further warming and drought here may reduce tick survival and host-seeking  
587 suitability (Vail and Smith 1998, Randolph and Storey 1999, Schulze et al. 2001, Berger et al.  
588 2014, MacDonald et al. 2020). Generating more accurate projections for these regions would  
589 require experiments investigating effects of future temperatures on aspects of tick-borne disease  
590 transmission.

591 Despite these limitations and the large uncertainty in our Lyme disease projections, our  
592 results are consistent with a growing body of evidence linking increased Lyme disease risk with  
593 climate warming (Brownstein et al. 2005a, Burtis et al. 2016, Clow et al. 2017b, Dumic and  
594 Severnini 2018, Kilpatrick et al. 2017, Leighton et al. 2012, Ogden et al. 2008, 2014b, Robinson  
595 et al. 2015, Subak 2003, Tuite et al. 2013). Specifically, our finding of climate change-induced  
596 increases in Lyme disease burden at higher latitudes, is consistent with prior studies projecting or  
597 observing increasing *I. scapularis* habitat suitability and range expansion under climate warming  
598 (Ogden et al. 2008, 2014a, McPherson et al. 2017). Similar range expansions have also been  
599 projected and observed for *Ixodes ricinus*, the European Lyme disease vector, under climate  
600 warming (Gray et al. 2009, Jaenson and Lindgren 2011, Lindgren et al. 2000, Porretta et al.  
601 2013). Further, our finding that the projected changes in incidence depend on the degree of

602 future warming is also consistent with prior work. *I. scapularis* range expansion and population  
603 growth, and the proportion of Eastern Canadians at risk for Lyme disease, are projected to be  
604 higher under upper climate change scenarios than under mitigation scenarios (Leighton et al.  
605 2012, McPherson et al. 2017). These results suggest that vector range expansions and future  
606 Lyme disease burdens depend in part on climate policy actions.

607 More generally, our results are consistent with expectations from vector thermal biology  
608 that suggest that warming temperatures generally increase transmission near the cold edge of a  
609 vector's range limit, but may decrease or have variable effects elsewhere (Martens et al. 1995,  
610 Ogden and Lindsay 2016, Lafferty and Mordecai 2016, Mordecai et al. 2019). For tick-borne  
611 diseases, as for other vector-borne diseases, multiple temperature-sensitive traits combine to  
612 influence transmission, including survival, development rates, and host-seeking (Randolph et al.  
613 2002, Ogden et al. 2004, Randolph 2004, Ogden and Lindsay 2016, Ogden 2017). Nonlinear  
614 effects of temperature on these traits typically leads to vector-borne disease transmission peaking  
615 at intermediate temperatures and declining as temperatures approach lower and upper thermal  
616 limits (Mordecai et al. 2019). This suggests that climate warming would most strongly increase  
617 transmission near the lower thermal limits, such as in the Northeast, as was observed here. This  
618 further suggests the effects of climate warming would differ in magnitude and direction  
619 depending on the extent of warming, as seen in the Midwest region where non-significant  
620 increases were projected under the moderate climate change scenario while decreases were  
621 projected under the upper scenario. The theoretical expectations of nonlinear thermal responses  
622 therefore help to explain some of the context-dependent effects of temperature found empirically  
623 in this study.

624

## 625 **Conclusions**

626 We demonstrate that interannual variation in Lyme disease incidence is associated with climate  
627 in all US regions with established vector species, independent of other drivers of disease risk and  
628 excluding potentially spurious relationships with county- and year-specific variation. The  
629 specific climate variable(s) associated with incidence and their effect sizes varied by region, but  
630 the strongest climate-disease association observed was between warming temperatures and  
631 increasing incidence in the Northeast. However, in all regions, climate explained less variation in  
632 incidence than unobserved county-specific heterogeneity, highlighting that climate is one of

633 many factors influencing Lyme disease transmission. We project that future climate change  
634 could substantially increase Lyme disease burden in the Northeast in coming decades under an  
635 upper climate change scenario. Cases in the Northeast were not projected to increase under a  
636 moderate climate change scenario, highlighting the potential for climate change mitigation to  
637 protect human health by preventing further increases in Lyme disease incidence. However, the  
638 projected effects in this region and all others are highly uncertain, indicating a wide range of  
639 potential disease outcomes under climate change. Our projections provide an essential first step  
640 in determining broad patterns of Lyme disease risk under climate change, but ongoing  
641 surveillance efforts and mechanistic studies linking changes in vector ecology under climate  
642 change to human disease incidence should be conducted to refine these risk assessments.  
643

644 **Author Contributions:**

645 LIC and EAM conceived of the project. All authors designed the analyses. LIC gathered the data  
646 and performed the analyses. LIC drafted the manuscript. AJM and EAM revised the manuscript.  
647 All authors read and approved the final manuscript. LIC was funded by the Stanford Graduate  
648 Fellowship. AJM was funded by a UC Santa Barbara Faculty Research Grant. EAM was funded  
649 by an NSF Ecology and Evolution of Infectious Diseases grant (DEB-1518681), the Terman  
650 Award, and the NIH NIGMS Maximizing Investigators' Research Award (R35GM133439).

651

652 **Acknowledgements:**

653 We are grateful to the CDC Division of Vector-Borne Diseases for supplying Lyme disease case  
654 data, Mohammad Alhamdan from NASA for supplying climate data, and to Iain Caldwell, Jamie  
655 Caldwell, Marissa Childs, Johannah Farner, Elizabeth Hadly, Morgan Kain, Devin Kirk, Giulio  
656 de Leo, Nicole Nova, and Marta Shocket for providing helpful feedback on the manuscript.

657

658 **Data Accessibility:**

659 All datasets used in this study are free and publicly available. These datasets can be found here:  
660 <https://github.com/lcouper/LymeDiseaseClimateChange>, along with information about where  
661 and when they were originally accessed.

662

663 **References:**

- 664 Adrion, E. R., J. Aucott, K. W. Lemke, and J. P. Weiner. 2015. Health care costs, utilization and  
665 patterns of care following Lyme disease. *PLOS ONE* 10:e0116767.
- 666 Allen, P. G., and R. Fildes. 2001. Econometric Forecasting. Pages 303–362 in J. S. Armstrong,  
667 editor. *Principles of Forecasting*. Springer US, Boston, MA.
- 668 Armstrong, P. M., L. R. Brunet, A. Spielman, and S. R. Telford III. 2001. Risk of Lyme disease:  
669 perceptions of residents of a Lone Star tick-infested community. *Bulletin of the World*  
670 *Health Organization* 79:916–925.
- 671 Arsnoe, I. M., G. J. Hickling, H. S. Ginsberg, R. McElreath, and J. I. Tsao. 2015. Different  
672 populations of blacklegged tick nymphs exhibit differences in questing behavior that  
673 have implications for human Lyme disease risk. *PLOS ONE* 10:e0127450.
- 674 Bascle, G. 2008. Controlling for endogeneity with instrumental variables in strategic  
675 management research. *Strategic Organization* 6:285–327.
- 676 Berger, K. A., H. S. Ginsberg, K. D. Dugas, L. H. Hamel, and T. N. Mather. 2014. Adverse  
677 moisture events predict seasonal abundance of Lyme disease vector ticks (*Ixodes*  
678 *scapularis*). *Parasites & Vectors* 7:181.
- 679 Berry, K., J. Bayham, S. R. Meyer, and E. P. Fenichel. 2018. The allocation of time and risk of  
680 Lyme: A case of ecosystem service income and substitution effects. *Environmental and*  
681 *Resource Economics* 70:631–650.
- 682 Brinkerhoff, R. J., C. M. Folsom-O’Keefe, K. Tsao, and M. A. Diuk-Wasser. 2011. Do birds  
683 affect Lyme disease risk? Range expansion of the vector-borne pathogen *Borrelia*  
684 *burgdorferi*. *Frontiers in Ecology and the Environment* 9:103–110.
- 685 Brownstein, J. S., T. R. Holford, and D. Fish. 2003. A climate-based model predicts the spatial  
686 distribution of the Lyme disease vector *Ixodes scapularis* in the United States.  
687 *Environmental Health Perspectives* 111:1152–1157.
- 688 Brownstein, J. S., T. R. Holford, and D. Fish. 2005a. Effect of climate change on Lyme disease  
689 risk in North America. *EcoHealth* 2:38–46.
- 690 Brownstein, J. S., D. K. Skelly, T. R. Holford, and D. Fish. 2005b. Forest fragmentation predicts  
691 local scale heterogeneity of Lyme disease risk. *Oecologia* 146:469–475.

- 692 Burtis, J. C., P. Sullivan, T. Levi, K. Oggenfuss, T. J. Fahey, and R. S. Ostfeld. 2016. The impact  
693 of temperature and precipitation on blacklegged tick activity and Lyme disease incidence  
694 in endemic and emerging regions. *Parasites & Vectors* 9.
- 695 Caldwell, J., S. Heron, C. Eakin, and M. Donahue. 2016. Satellite SST-based coral disease  
696 outbreak predictions for the Hawaiian archipelago. *Remote Sensing* 8:93.
- 697 Cameron, A. C., and D. L. Miller. 2015. A practitioner's guide to cluster-robust inference.  
698 *Journal of Human Resources* 50:317–372.
- 699 Clark, J. S., S. R. Carpenter, M. Barber, S. Collins, A. Dobson, J. A. Foley, D. M. Lodge, M.  
700 Pascual, R. Pielke, W. Pizer, C. Pringle, W. V. Reid, K. A. Rose, O. Sala, W. H.  
701 Schlesinger, D. H. Wall, and D. Wear. 2001. Ecological forecasts: An emerging  
702 imperative. *Science* 293:657–660.
- 703 Clow, K. M., P. A. Leighton, N. H. Ogden, L. R. Lindsay, P. Michel, D. L. Pearl, and C. M.  
704 Jardine. 2017a. Northward range expansion of *Ixodes scapularis* evident over a short  
705 timescale in Ontario, Canada. *PLOS ONE* 12:e0189393.
- 706 Clow, K. M., N. H. Ogden, L. R. Lindsay, P. Michel, D. L. Pearl, and C. M. Jardine. 2017b. The  
707 influence of abiotic and biotic factors on the invasion of *Ixodes scapularis* in Ontario,  
708 Canada. *Ticks and Tick-borne Diseases* 8:554–563.
- 709 Dennis, D. T., T. S. Nekomoto, J. C. Victor, W. S. Paul, and J. Piesman. 1998. Reported  
710 Distribution of *Ixodes scapularis* and *Ixodes pacificus* (Acari: Ixodidae) in the United  
711 States. *Journal of Medical Entomology* 35:629–638.
- 712 Dister, S. W., and D. Fish. 1997. Landscape characterization of peridomestic risk for Lyme  
713 disease using satellite imagery. *American Journal of Tropical Medicine and Hygiene*:6.
- 714 Dunic, I., and E. Severnini. 2018. “Ticking bomb”: The impact of climate change on the  
715 incidence of Lyme disease. 2018:5719081
- 716 Eisen, R. J., L. Eisen, N. H. Ogden, and C. B. Beard. 2016. Linkages of weather and climate with  
717 *Ixodes scapularis* and *Ixodes pacificus* (Acari: Ixodidae), enzootic transmission of  
718 *Borrelia burgdorferi* and Lyme disease in North America. *Journal of Medical*  
719 *Entomology* 53:250–261.
- 720 Estrada-Peña, A. 2002. Increasing habitat suitability in the United States for the tick that  
721 transmits Lyme disease: a remote sensing approach. *Environmental Health Perspectives*  
722 110:635–640.



- 723 Frank, D. H., D. Fish, and F. H. Moy. 1998. Landscape features associated with Lyme disease  
724 risk in a suburban residential environment. *Landscape Ecology* 13:27–36.
- 725 Gigon, F. 1985. Biologie d'*Ixodes ricinus* L. sur le Plateau Suisse – une contribution à l'écologie  
726 de ce vecteur. Université de Neuchâtel, Neuchâtel, Switzerland.
- 727 Ginsberg, H. S., M. Albert, L. Acevedo, M. C. Dyer, I. M. Arsnoe, J. I. Tsao, T. N. Mather, and  
728 R. A. LeBrun. 2017. Environmental factors affecting survival of immature *Ixodes*  
729 *scapularis* and implications for geographical distribution of Lyme disease: The  
730 climate/behavior hypothesis. *PLOS ONE* 12:e0168723.
- 731 Glass, G. E., B. S. Schwartz, J. M. Morgan, D. T. Johnson, P. M. Noy, and E. Israel. 1995.  
732 Environmental risk factors for Lyme disease identified with geographic information  
733 systems. *American Journal of Public Health* 85:944–948.
- 734 González, C., O. Wang, S. E. Strutz, C. González-Salazar, V. Sánchez-Cordero, and S. Sarkar.  
735 2010. Climate change and risk of Leishmaniasis in North America: Predictions from  
736 ecological niche models of vector and reservoir species. *PLoS Neglected Tropical*  
737 *Diseases* 4:e585.
- 738 Gray, J. S., H. Dautel, A. Estrada-Peña, O. Kahl, and E. Lindgren. 2009. Effects of climate  
739 change on ticks and tick-borne diseases in Europe. *Interdisciplinary Perspectives on*  
740 *Infectious Diseases* 2009:1–12.
- 741 Hahn, M. B., C. S. Jarnevich, A. J. Monaghan, and R. J. Eisen. 2016. Modeling the geographic  
742 distribution of *Ixodes scapularis* and *Ixodes pacificus* (Acari: Ixodidae) in the contiguous  
743 United States. *Journal of Medical Entomology* 53:1176–1191.
- 744 Hair, J. F., W. C. Black, B. Babin, and R. Anderson, editors. 2014. *Multivariate data analysis*.  
745 Seventh edition. Pearson.
- 746 Hauer, M. E. 2019. Population projections for U.S. counties by age, sex, and race controlled to  
747 shared socioeconomic pathway. *Scientific Data* 6.
- 748 Hayhoe, K., J. Edmonds, R. E. Kopp, A. N. LeGrande, B. M. Sanderson, M. F. Wehner, and D.  
749 J. Wuebbles. 2017. 2017: Climate models, scenarios, and projections. Pages 133–160 *in*  
750 D. J. Wuebbles, D. W. Fahey, K. A. Hibbard, D. J. Dokken, B. C. Stewart, and T. K.  
751 Maycock, editors. *Climate Science Special Report: Fourth National Climate Assessment*,  
752 Volume I. U.S. Global Change Research Program Washington, DC, USA.

- 753 Herrmann, C., and L. Gern. 2013. Survival of *Ixodes ricinus* (Acari: Ixodidae) nymphs under  
754 cold conditions is negatively influenced by frequent temperature variations. *Ticks and*  
755 *Tick-borne Diseases* 4:445–451.
- 756 Hii, Y. L., J. Rocklöv, N. Ng, C. S. Tang, F. Y. Pang, and R. Sauerborn. 2009. Climate  
757 variability and increase in intensity and magnitude of dengue incidence in Singapore.  
758 *Global Health Action* 2:2036.
- 759 Hijmans, R. J. 2012. Cross-validation of species distribution models: removing spatial sorting  
760 bias and calibration with a null model. *Ecology* 93:679–688.
- 761 Humphrey, P. T., D. A. Caporale, and D. Brisson. 2010. Uncoordinated phylogeography of  
762 *Borrelia burgdorferi* and its tick vector, *Ixodes scapularis*. *Evolution* 64:2653–2663.
- 763 Jaenson, T. G., D. G. Jaenson, L. Eisen, E. Petersson, and E. Lindgren. 2012. Changes in the  
764 geographical distribution and abundance of the tick *Ixodes ricinus* during the past 30  
765 years in Sweden. *Parasites & Vectors* 5:1–15.
- 766 Jaenson, T. G. T., and E. Lindgren. 2011. The range of *Ixodes ricinus* and the risk of contracting  
767 Lyme borreliosis will increase northwards when the vegetation period becomes longer.  
768 *Ticks and Tick-borne Diseases* 2:44–49.
- 769 Johnson, L., A. Aylward, and R. B. Stricker. 2011. Healthcare access and burden of care for  
770 patients with Lyme disease: A large United States survey. *Health Policy* 102:64–71.
- 771 Jones, C. J., and U. D. Kitron. 2000. Populations of *Ixodes scapularis* (Acari: Ixodidae) are  
772 modulated by drought at a Lyme disease focus in Illinois. *Journal of Medical Entomology*  
773 37:408–415.
- 774 Judge, G., W. Griffiths, R. Carter, H. Lutkepohl, and T. Lee. 1985. *The theory and practice of*  
775 *econometrics*. Wiley, New York.
- 776 Kain, D. E., F. A. H. Sperling, H. V. Daly, and R. S. Lane. 1999. Mitochondrial DNA sequence  
777 variation in *Ixodes pacificus* (Acari: Ixodidae). *Heredity* 83:378–386.
- 778 Kain, D. E., F. A. H. Sperling, and R. S. Lane. 1997. Population genetic structure of *Ixodes*  
779 *pacificus* (Acari: Ixodidae) using allozymes. *Journal of Medical Entomology* 34:441–  
780 450.
- 781 Killilea, M. E., A. Swei, R. S. Lane, C. J. Briggs, and R. S. Ostfeld. 2008. Spatial Dynamics of  
782 Lyme Disease: A Review. *EcoHealth* 5:167–195.

- 783 Kilpatrick, A. M., A. D. M. Dobson, T. Levi, D. J. Salkeld, A. Swei, H. S. Ginsberg, A.  
784 Kjemtrup, K. A. Padgett, P. M. Jensen, D. Fish, N. H. Ogden, and M. A. Diuk-Wasser.  
785 2017. Lyme disease ecology in a changing world: consensus, uncertainty and critical gaps  
786 for improving control. *Philosophical Transactions of the Royal Society B: Biological*  
787 *Sciences* 372:20160117.
- 788 Kilpatrick, A. M., and S. E. Randolph. 2012. Drivers, dynamics, and control of emerging vector-  
789 borne zoonotic diseases. *The Lancet* 380:1946–1955.
- 790 Kurtenbach, K., K. Hanincová, J. I. Tsao, G. Margos, D. Fish, and N. H. Ogden. 2006.  
791 Fundamental processes in the evolutionary ecology of Lyme borreliosis. *Nature Reviews*  
792 *Microbiology* 4:660–669.
- 793 Lafferty, K. D., and E. A. Mordecai. 2016. The rise and fall of infectious disease in a warmer  
794 world. *F1000Research* 5.
- 795 Lane, R. S., N. Fedorova, J. E. Kleinjan, and M. Maxwell. 2013. Eco-epidemiological factors  
796 contributing to the low risk of human exposure to ixodid tick-borne borreliae in southern  
797 California, USA. *Ticks and Tick-borne Diseases* 4:377–385.
- 798 Lane, R. S., J. E. Kleinjan, and G. B. Schoeler. 1995. Diel activity of nymphal *Dermacentor*  
799 *occidentalis* and *Ixodes pacificus* (Acari: Ixodidae) in relation to meteorological factors  
800 and host activity periods. *Journal of Medical Entomology* 32:290–299.
- 801 Larsen, A. E., A. J. MacDonald, and A. J. Plantinga. 2014. Lyme disease risk influences human  
802 settlement in the wildland–urban interface: Evidence from a longitudinal analysis of  
803 counties in the northeastern United States. *The American Journal of Tropical Medicine*  
804 *and Hygiene* 91:747–755.
- 805 Larsen, A. E., K. Meng, and B. E. Kendall. 2019. Causal analysis in control-impact ecological  
806 studies with observational data. *Methods in Ecology and Evolution*.
- 807 Leighton, P. A., J. K. Koffi, Y. Pelcat, L. R. Lindsay, and N. H. Ogden. 2012a. Predicting the  
808 speed of tick invasion: an empirical model of range expansion for the Lyme disease  
809 vector *Ixodes scapularis* in Canada. *Journal of Applied Ecology* 49:457–464.
- 810 Lindgren E, Tälleklint L, and Polfeldt T. 2000. Impact of climatic change on the northern  
811 latitude limit and population density of the disease-transmitting European tick *Ixodes*  
812 *ricinus*. *Environmental Health Perspectives* 108:119–123.

- 813 Lindsay, L. R., I. K. Barker, G. A. Surgeoner, S. A. McEwen, T. J. Gillespie, and J. T. Robinson.  
814 1995. Survival and development of *Ixodes scapularis* (Acari: Ixodidae) under various  
815 climatic conditions in Ontario, Canada. *Journal of Medical Entomology* 32:143–152.
- 816 Loevinsohn, M. E. 1994. Climatic warming and increased malaria incidence in Rwanda. *The*  
817 *Lancet* 343:714–718.
- 818 MacDonald, A. J., and C. J. Briggs. 2016. Truncated seasonal activity patterns of the western  
819 blacklegged tick (*Ixodes pacificus*) in central and southern California. *Ticks and Tick-*  
820 *borne Diseases* 7:234–242.
- 821 MacDonald, A. J., A. E. Larsen, and A. J. Plantinga. 2019a. Missing the people for the trees:  
822 Identifying coupled natural–human system feedbacks driving the ecology of Lyme  
823 disease. *Journal of Applied Ecology* 56:354–364.
- 824 MacDonald, A. J., S. McComb, C. O’Neill, K. A. Padgett, and A. E. Larsen. 2020. Projected  
825 climate and land use change alter western blacklegged tick phenology, seasonal host-  
826 seeking suitability and human encounter risk in California. *Global Change Biology*  
827 2020:1–16.
- 828 MacDonald, A. J., and E. A. Mordecai. 2019. Amazon deforestation drives malaria transmission,  
829 and malaria burden reduces forest clearing. *Proceedings of the National Academy of*  
830 *Sciences* 116:22212–22218.
- 831 MacDonald, A. J., C. O’Neill, M. H. Yoshimizu, K. A. Padgett, and A. E. Larsen. 2019b.  
832 Tracking seasonal activity of the western blacklegged tick across California. *Journal of*  
833 *Applied Ecology* 56:2562–2573.
- 834 Martens, W., T. Jetten, J. Rotmans, and L. Niessen. 1995. Climate change and vector-borne  
835 diseases: A global modelling perspective. *Global Environmental Change* 5:195–209.
- 836 Mattingly, P. F. 1969. *The biology of mosquito-borne disease*. London: George Allen and Unwin  
837 Ltd.
- 838 McCabe, G. J., and J. E. Bunnell. 2004. Precipitation and the occurrence of Lyme disease in the  
839 northeastern United States. *Vector-Borne and Zoonotic Diseases* 4:143–148.
- 840 McClure, M., and M. A. Diuk-Wasser. 2019. Climate impacts on blacklegged tick host-seeking  
841 behavior. *International Journal for Parasitology* 49:37–47.
- 842 McEnroe, W. D. 1977. Restriction of the species range of *Ixodes scapularis*, Say, in  
843 Massachusetts by fall and winter temperature. *Acarologia*.

- 844 McPherson, M., A. García-García, F. J. Cuesta-Valero, H. Beltrami, P. Hansen-Ketchum, D.  
845 MacDougall, and N. H. Ogden. 2017. Expansion of the Lyme disease vector *Ixodes*  
846 *scapularis* in Canada inferred from CMIP5 climate projections. *Environmental Health*  
847 *Perspectives* 125:057008.
- 848 Mills, J. N., K. L. Gage, and A. S. Khan. 2010. Potential influence of climate change on vector-  
849 borne and zoonotic diseases: A review and proposed research plan. *Environmental Health*  
850 *Perspectives* 118:1507–1514.
- 851 Mordecai, E. A., J. M. Caldwell, M. K. Grossman, C. A. Lippi, L. R. Johnson, M. Neira, J. R.  
852 Rohr, S. J. Ryan, V. Savage, M. S. Shocket, R. Sippy, A. M. S. Ibarra, M. B. Thomas,  
853 and O. Villena. 2019. Thermal biology of mosquito-borne disease. *Ecology Letters*  
854 22:1690–1708.
- 855 Morshed, M. G., J. D. Scott, K. Fernando, G. Geddes, A. McNabb, S. Mak, and L. A. Durden.  
856 2006. Distribution and characterization of *Borrelia burgdorferi* isolates from *Ixodes*  
857 *scapularis* and presence in mammalian hosts in Ontario, Canada. *Journal of Medical*  
858 *Entomology* 43:762–773.
- 859 Nakicenovic, N., J. Alcamo, A. Grubler, K. Riahi, R. A. Roehrl, H.-H. Rogner, and N. Victor.  
860 2000. Special Report on Emissions Scenarios (SRES), A Special Report of Working  
861 Group III of the Intergovernmental Panel on Climate Change. Cambridge University  
862 Press, Cambridge.
- 863 Nieto, N. C., E. A. Holmes, and J. E. Foley. 2010. Survival rates of immature *Ixodes pacificus*  
864 (Acari: Ixodidae) ticks estimated using field-placed enclosures. *Journal of Vector*  
865 *Ecology* 35:43–49.
- 866 Ogden, N. H. 2017. Climate change and vector-borne diseases of public health significance.  
867 *FEMS Microbiology Letters* 364.
- 868 Ogden, N. H., M. Bigras-Poulin, C. J. O’Callaghan, I. K. Barker, L. R. Lindsay, A. Maarouf, K.  
869 E. Smoyer-Tomic, D. Waltner-Toews, and D. Charron. 2005. A dynamic population  
870 model to investigate effects of climate on geographic range and seasonality of the tick  
871 *Ixodes scapularis*. *International Journal for Parasitology* 35:375–389.
- 872 Ogden, N. H., and L. R. Lindsay. 2016. Effects of climate and climate change on vectors and  
873 vector-borne diseases: Ticks are different. *Trends in Parasitology* 32:646–656.

- 874 Ogden, N. H., L. R. Lindsay, G. Beauchamp, D. Charron, A. Maarouf, C. J. O’Callaghan, D.  
875 Waltner-Toews, and I. K. Barker. 2004. Investigation of relationships between  
876 temperature and developmental rates of tick *Ixodes scapularis* (Acari: Ixodidae) in the  
877 laboratory and field. *Journal of Medical Entomology* 41:622–633.
- 878 Ogden, N. H., A. Maarouf, I. K. Barker, M. Bigras-Poulin, L. R. Lindsay, M. G. Morshed, C. J.  
879 O’Callaghan, F. Ramay, D. Waltner-Toews, and D. F. Charron. 2006. Climate change  
880 and the potential for range expansion of the Lyme disease vector *Ixodes scapularis* in  
881 Canada. *International Journal for Parasitology* 36:63–70.
- 882 Ogden, N. H., M. Radojevic’, X. Wu, V. R. Duvvuri, P. A. Leighton, and J. Wu. 2014a.  
883 Estimated effects of projected climate change on the basic reproductive number of the  
884 Lyme disease vector *Ixodes scapularis*. *Environmental Health Perspectives* 122:631–638.
- 885 Ogden, N. H., L. St-Onge, I. K. Barker, S. Brazeau, M. Bigras-Poulin, D. F. Charron, C. M.  
886 Francis, A. Heagy, R. Lindsay, A. Maarouf, P. Michel, F. Milord, C. J. O’Callaghan, L.  
887 Trudel, and A. Thompson. 2008. Risk maps for range expansion of the Lyme disease  
888 vector, *Ixodes scapularis*, in Canada now and with climate change. *International Journal*  
889 *of Health Geographics* 7:24.
- 890 Ogden, N., J. Koffi, Y. Pelcat, and L. Lindsay. 2014b. Environmental risk from Lyme disease in  
891 central and eastern Canada: a summary of recent surveillance information. *Canada*  
892 *Communicable Disease Report* 40:74–82.
- 893 Ostfeld, R., and J. Brunner. 2015. Climate change and *Ixodes* tick-borne diseases of humans.  
894 *Philosophical Transactions of the Royal Society B: Biological Sciences* 370:20140051.
- 895 Ostfeld, R. S. 1997. The ecology of Lyme-disease risk: Complex interactions between seemingly  
896 unconnected phenomena determine risk of exposure to this expanding disease. *American*  
897 *Scientist* 85:338–346.
- 898 Padgett, K. A., and R. S. Lane. 2001. Life cycle of *Ixodes pacificus* (Acari: Ixodidae): Timing of  
899 developmental processes under field and laboratory conditions. *Journal of Medical*  
900 *Entomology* 38:684–693.
- 901 Peavey, C. A., and R. S. Lane. 1996. Field and laboratory studies on the timing of oviposition  
902 and hatching of the western black-legged tick, *Ixodes pacificus* (Acari: Ixodidae).  
903 *Experimental and Applied Acarology* 20:695–711.

- 904 Porretta, D., V. Mastrantonio, S. Amendolia, S. Gaiarsa, S. Epis, C. Genchi, C. Bandi, D.  
905 Otranto, and S. Urbanelli. 2013. Effects of global changes on the climatic niche of the  
906 tick *Ixodes ricinus* inferred by species distribution modelling. *Parasites & Vectors* 6:271.
- 907 Prusinski, M. A., H. Chen, J. M. Drobnack, S. J. Kogut, R. G. Means, J. J. Howard, J. Oliver, G.  
908 Lukacik, P. B. Backenson, and D. J. White. 2006. Habitat structure associated with  
909 *Borrelia burgdorferi* prevalence in small mammals in New York state. *Environmental*  
910 *Entomology* 35:308–319.
- 911 Purse, B. V., P. S. Mellor, D. J. Rogers, A. R. Samuel, P. P. C. Mertens, and M. Baylis. 2005.  
912 Climate change and the recent emergence of bluetongue in Europe. *Nature Reviews*  
913 *Microbiology* 3:171–181.
- 914 Raghavan, R. K., K. Almes, D. G. Goodin, J. A. Harrington, and P. W. Stackhouse. 2014.  
915 Spatially heterogeneous land cover/land use and climatic risk factors of tick-borne feline  
916 cytauxzoonosis. *Vector-Borne and Zoonotic Diseases* 14:486–495.
- 917 Rand, P. W., M. S. Holman, C. Lubelczyk, E. H. Lacombe, A. T. DeGaetano, and R. P. Smith.  
918 2004. Thermal accumulation and the early development of *Ixodes scapularis*. *Journal of*  
919 *Vector Ecology*:13.
- 920 Randolph, S. E. 1997. Abiotic and biotic determinants of the seasonal dynamics of the tick  
921 *Rhipicephalus appendiculatus* in South Africa. *Medical and Veterinary Entomology*  
922 11:25–37.
- 923 Randolph, S. E. 2004. Tick ecology: processes and patterns behind the epidemiological risk  
924 posed by ixodid ticks as vectors. *Parasitology* 129:S37–S65.
- 925 Randolph, S. E. 2010. To what extent has climate change contributed to the recent epidemiology  
926 of tick-borne diseases? *Veterinary Parasitology* 167:92–94.
- 927 Randolph, S. E., R. M. Green, A. N. Hoodless, and M. F. Peacey. 2002. An empirical  
928 quantitative framework for the seasonal population dynamics of the tick *Ixodes ricinus*.  
929 *International Journal for Parasitology* 32:979–989.
- 930 Randolph, S. E., and K. Storey. 1999. Impact of microclimate on immature tick-rodent host  
931 interactions (Acari: Ixodidae): Implications for parasite transmission. *Journal of Medical*  
932 *Entomology* 36:741–748.

- 933 Ricketts, T. H., E. Dinerstein, D. M. Olson, W. Eichbaum, C. J. Loucks, K. Kavanaugh, P.  
934 Hedao, P. Hurley, D. DellaSalla, R. Abell, K. Carney, and S. Walters. 1999. Terrestrial  
935 ecoregions of North America: A Conservation Assessment. Island Press.
- 936 Rizzoli, A., H. Hauffe, G. Carpi, G. Vourc'h, M. Neteler, and R. Rosa. 2011. Lyme borreliosis in  
937 Europe. *Euro Surveillance* 16.
- 938 Robinson, S. J., D. F. Neitzel, R. A. Moen, M. E. Craft, K. E. Hamilton, L. B. Johnson, D. J.  
939 Mulla, U. G. Munderloh, P. T. Redig, K. E. Smith, C. L. Turner, J. K. Umber, and K. M.  
940 Pelican. 2015. Disease risk in a dynamic environment: The spread of tick-borne  
941 pathogens in Minnesota, USA. *EcoHealth* 12:152–163.
- 942 Rodgers, S. E., C. P. Zolnik, and T. N. Mather. 2007. Duration of exposure to suboptimal  
943 atmospheric moisture affects nymphal blacklegged tick survival. *Journal of Medical*  
944 *Entomology* 44:372–375.
- 945 Rogelj, J., M. Meinshausen, and R. Knutti. 2012. Global warming under old and new scenarios  
946 using IPCC climate sensitivity range estimates. *Nature Climate Change* 2:248–253.
- 947 Rogers, D. J., and S. E. Randolph. 2006. Climate change and vector-borne diseases. Pages 345–  
948 381 *Advances in Parasitology*. Elsevier.
- 949 Roiz, D., M. Neteler, C. Castellani, D. Arnoldi, and A. Rizzoli. 2011. Climatic Factors Driving  
950 Invasion of the tiger mosquito (*Aedes albopictus*) into new areas of Trentino, Northern  
951 Italy. *PLoS ONE* 6:e14800.
- 952 Rosenberg, R., N. P. Lindsey, M. Fischer, C. J. Gregory, A. F. Hinckley, P. S. Mead, G. Paz-  
953 Bailey, S. H. Waterman, N. A. Drexler, G. J. Kersh, H. Hooks, S. K. Partridge, S. N.  
954 Visser, C. B. Beard, and L. R. Petersen. 2018. Vital Signs: Trends in Reported  
955 Vectorborne Disease Cases — United States and Territories, 2004–2016. *Morbidity and*  
956 *Mortality Weekly Report* 67:496–501.
- 957 Salkeld, D. J., and R. S. Lane. 2010. Community ecology and disease risk: lizards, squirrels, and  
958 the Lyme disease spirochete in California, USA. *Ecology* 91:293–298.
- 959 Samir, K. C, and Lutz, W. 2017. The human core of the shared socioeconomic pathways:  
960 Population scenarios by age, sex and level of education for all countries to 2100. *Global*  
961 *Environmental Change* 42:181–192.
- 962 Schaubert, E. M., R. S. Ostfeld, and A. S. E. Jr. 2005. What is the best predictor of annual Lyme  
963 disease incidence: Weather, mice, or acorns? *Ecological Applications* 15:575–586.



- 964 Schmidt, G. A., M. Kelley, L. Nazarenko, R. Ruedy, G. L. Russell, I. Aleinov, M. Bauer, S. E.  
965 Bauer, M. K. Bhat, R. Bleck, V. Canuto, Y.-H. Chen, Y. Cheng, T. L. Clune, A. Del  
966 Genio, R. de Fainchtein, G. Faluvegi, J. E. Hansen, R. J. Healy, N. Y. Kiang, D. Koch, A.  
967 A. Lacis, A. N. LeGrande, J. Lerner, K. K. Lo, E. E. Matthews, S. Menon, R. L. Miller,  
968 V. Oinas, A. O. Oloso, J. P. Perlwitz, M. J. Puma, W. M. Putman, D. Rind, A. Romanou,  
969 M. Sato, D. T. Shindell, S. Sun, R. A. Syed, N. Tausnev, K. Tsigaridis, N. Unger, A.  
970 Voulgarakis, M.-S. Yao, and J. Zhang. 2014. Configuration and assessment of the GISS  
971 ModelE2 contributions to the CMIP5 archive. *Journal of Advances in Modeling Earth*  
972 *Systems* 6:141–184.
- 973 Schulze, T. L., R. A. Jordan, and R. W. Hung. 2001. Effects of selected meteorological factors  
974 on diurnal questing of *Ixodes scapularis* and *Amblyomma americanum* (Acari: Ixodidae).  
975 *Journal of Medical Entomology* 38:318–324.
- 976 Scott, J., and C. Scott. 2018. Lyme disease propelled by *Borrelia burgdorferi*-infected  
977 blacklegged ticks, wild birds and public awareness — not climate change. *Journal of*  
978 *Veterinary Science & Medicine* 6:01–08.
- 979 Smith, J. R., A. D. Letten, P.-J. Ke, C. B. Anderson, J. N. Hendershot, M. K. Dhimi, G. A. Dlott,  
980 T. N. Grainger, M. E. Howard, B. M. L. Morrison, D. Routh, P. A. S. Juan, H. A.  
981 Mooney, E. A. Mordecai, T. W. Crowther, and G. C. Daily. 2018. A global test of  
982 ecoregions. *Nature Ecology & Evolution* 2:1889–1896.
- 983 Sohl, T. 2019. The next generation of land-cover projections for the conterminous United States.  
984 Sohl, T. L., K. L. Saylor, M. A. Bouchard, R. R. Reker, A. M. Friesz, S. L. Bennett, B. M.  
985 Sleeter, R. R. Sleeter, T. Wilson, C. Soulard, M. Knuppe, and T. V. Hofwegen. 2014.  
986 Spatially explicit modeling of 1992–2100 land cover and forest stand age for the  
987 conterminous United States. *Ecological Applications* 24:1015–1036.
- 988 Sonenshine, D. E., and R. M. Roe. 2013. *Biology of Ticks*. OUP USA.
- 989 Stafford, K. C. 1994. Survival of immature *Ixodes scapularis* (Acari: Ixodidae) at different  
990 relative humidities. *Journal of Medical Entomology* 31:310–314.
- 991 Subak, S. 2003. Effects of climate on variability in Lyme disease incidence in the Northeastern  
992 United States. *American Journal of Epidemiology* 157:531–538.
- 993 Swei, A., L. I. Couper, L. L. Coffey, D. Kapan, and S. Bennett. 2019. Patterns, drivers, and  
994 challenges of vector-borne disease emergence. *Vector-Borne and Zoonotic Diseases*.

- 995 Tabachnick, W. J. 2010. Challenges in predicting climate and environmental effects on vector-  
996 borne disease epistystems in a changing world. *Journal of Experimental Biology* 213:946–  
997 954.
- 998 Taylor, K. E., R. J. Stouffer, and G. A. Meehl. 2012. An overview of CMIP5 and the experiment  
999 design. *Bulletin of the American Meteorological Society* 93:485–498.
- 1000 Tuite, A. R., A. L. Greer, and D. N. Fisman. 2013. Effect of latitude on the rate of change in  
1001 incidence of Lyme disease in the United States. *CMAJ Open* 1:E43–E47.
- 1002 Vail, S. G., and G. Smith. 1998. Air temperature and relative humidity effects on behavioral  
1003 activity of blacklegged tick (Acari: Ixodidae) nymphs in New Jersey. *Journal of Medical*  
1004 *Entomology* 35:1025–1028.
- 1005 Vandyk, J. K., D. M. Bartholomew, W. A. Rowley, and K. B. Platt. 1996. Survival of *Ixodes*  
1006 *scapularis* (Acari: Ixodidae) exposed to cold. *Journal of Medical Entomology* 33:6–10.
- 1007 van Vuuren, D. P., J. Edmonds, M. Kainuma, K. Riahi, A. Thomson, K. Hibbard, G. C. Hurtt, T.  
1008 Kram, V. Krey, J.-F. Lamarque, T. Masui, M. Meinshausen, N. Nakicenovic, S. J. Smith,  
1009 and S. K. Rose. 2011. The representative concentration pathways: an overview. *Climatic*  
1010 *Change* 109:5–31.
- 1011 Wenger, S. J., D. J. Isaak, J. B. Dunham, K. D. Fausch, C. H. Luce, H. M. Neville, B. E. Rieman,  
1012 M. K. Young, D. E. Nagel, D. L. Horan, and G. L. Chandler. 2011. Role of climate and  
1013 invasive species in structuring trout distributions in the interior Columbia River Basin,  
1014 USA. *Canadian Journal of Fisheries and Aquatic Sciences* 68:988–1008.
- 1015 Wenger, S. J., and J. D. Olden. 2012. Assessing transferability of ecological models: an  
1016 underappreciated aspect of statistical validation. *Methods in Ecology and Evolution*  
1017 3:260–267.
- 1018 Wilking, H., and K. Stark. 2014. Trends in surveillance data of human Lyme borreliosis from six  
1019 federal states in eastern Germany, 2009–2012. *Ticks and Tick-borne Diseases* 5:219–224.
- 1020 Wimberly, M. C., M. J. Yabsley, A. D. Baer, V. G. Dugan, and W. R. Davidson. 2008. Spatial  
1021 heterogeneity of climate and land-cover constraints on distributions of tick-borne  
1022 pathogens. *Global Ecology and Biogeography* 17:189–202.
- 1023 World Health Organization. 2014. A global brief on vector-borne diseases. World Health  
1024 Organization Technical Report.

- 1025 Yamashita, T., K. Yamashita, and R. Kamimura. 2007. A stepwise AIC method for variable  
1026 selection in linear regression. *Communications in Statistics - Theory and Methods*  
1027 36:2395–2403.
- 1028 Yang, L., S. Jin, P. Danielson, C. Homer, L. Gass, S. M. Bender, A. Case, C. Costello, J. Dewitz,  
1029 J. Fry, M. Funk, B. Granneman, G. C. Liknes, M. Rigge, and G. Xian. 2018. A new  
1030 generation of the United States National Land Cover Database: Requirements, research  
1031 priorities, design, and implementation strategies. *ISPRS Journal of Photogrammetry and*  
1032 *Remote Sensing* 146:108–123.
- 1033 Zhang, Z. 2016. Variable selection with stepwise and best subset approaches. *Annals of*  
1034 *Translational Medicine* 4:136–136.
- 1035
- 1036

1037 **Tables**

1038

1039 **Table 1.** Climate variables considered for models of disease incidence by region, along with  
 1040 descriptions and justification of their relevance to disease transmission.

1041

| <b>Climate Variable</b>        | <b>Description</b>                                                                                                                                                                                                                                                          | <b>Biological Relevance</b>                                                                                                                                                                                                                                                                                                                                                                         |
|--------------------------------|-----------------------------------------------------------------------------------------------------------------------------------------------------------------------------------------------------------------------------------------------------------------------------|-----------------------------------------------------------------------------------------------------------------------------------------------------------------------------------------------------------------------------------------------------------------------------------------------------------------------------------------------------------------------------------------------------|
| Lagged winter temperature      | Average monthly temperatures for Dec - Feb 1.5 years prior. Identified by Subak 2003 as significantly positively correlated with Lyme disease incidence in highly endemic areas.                                                                                            | Colder winter temperatures are associated with reduced host-seeking abilities of the adult tick (Duffy and Campbell 1994, Clark 1995, Carroll and Kramer 2003) and reduced abundance of the white-footed mouse, a highly competent reservoir host (Wolff 1996).                                                                                                                                     |
| Spring precipitation           | Average precipitation in May and June. Identified by McCabe and Bunnell 2004 as significantly positively correlated with Lyme disease incidence in highly endemic areas.                                                                                                    | Greater precipitation during the late spring and early summer increases the moisture of the leaf litter, providing conditions which promote the survival and questing activity of the nymphal life stage (Knülle and Rudolph 1982, Berger et al. 2014).                                                                                                                                             |
| Hot, dry days                  | The number of days with temperature > 25°C and precipitation = 0 during May – July (or May – June for counties with <i>Ixodes pacificus</i> ). Identified by Burtis et al. 2016 as significantly negatively correlated with Lyme disease incidence in highly endemic areas. | Hot, dry conditions are associated with decreased questing activity and questing height of ticks (Randolph and Storey 1999, Schulze et al. 2001), reducing the likelihood of attachment to humans (Arsnoe et al. 2015). The May - July, and May - June, time periods capture the peak nymphal questing periods for <i>I. scapularis</i> and <i>I. pacificus</i> , respectively (Eisen et al. 2016). |
| Cumulative average temperature | The sum of average daily temperatures (°F) over the entire year                                                                                                                                                                                                             | Cumulative temperature appears to control most developmental stages of <i>I. scapularis</i> (Lindsay et al. 1995, Rand et al. 2004). Lower cumulative temperature is associated with longer development periods and/or higher tick mortality (McEnroe 1977, Estrada-Peña 2002, Brownstein et al. 2003, Ogden et al. 2004, Leighton et al. 2012).                                                    |
| Total annual precipitation     | The sum of total daily precipitation (mm) over the entire year                                                                                                                                                                                                              | Greater precipitation increases the moisture of the leaf litter, providing conditions which favor tick survival and questing activity (Knülle and Rudolph 1982, Jones and Kitron 2000, Berger et al. 2014a).                                                                                                                                                                                        |

---

|                                 |                                                                      |                                                                                                                                                                                                                                                                                                                                                                                                                          |
|---------------------------------|----------------------------------------------------------------------|--------------------------------------------------------------------------------------------------------------------------------------------------------------------------------------------------------------------------------------------------------------------------------------------------------------------------------------------------------------------------------------------------------------------------|
| Daily temperature variability   | The variance in average daily temperatures (°F) over the entire year | Frequent temperature variation can decrease tick survival, even beyond that of constant cold exposure, due to energetic costs associated with adapting to changing temperatures (Gigon 1985, Hermann and Gern, 2013); however, effects will vary based on the average temperature of the region.                                                                                                                         |
| Daily precipitation variability | The variance in total daily precipitation (mm) over the entire year  | Both drought and heavy rainfall are associated with decreased tick questing activity and survival (Randolph 1997, Jones and Kitron 2000, Perret et al. 2004). Variation in precipitation, as opposed to consistent rainfall supplying favorable high relative humidity conditions, may thus be detrimental for tick survival, but will depend on the average precipitation of the region and the magnitude of variation. |

---

1042  
1043  
1044

1045 **Table 2.** Effect of climate and non-climate variables on Lyme disease incidence by region. Only  
 1046 variables included in the best fit model, as determined by variable selection, are shown. The  
 1047 scaled coefficient estimates (Coef.) shown here reflect the standard deviation change in Lyme  
 1048 disease incidence for a one standard deviation change in the climate variable. The coefficients  
 1049 are scaled so that the effects of different variables are directly comparable. The standard errors  
 1050 (SE) shown are clustered by the agricultural statistics district (see Methods: Statistical analysis).  
 1051 Statistically significant ( $p < 0.05$ ) coefficients are denoted with \*.  
 1052

| Variable                                               | Northeast |       | Midwest |       | Pacific |       | Pacific Southwest |       | Southwest |       | Southeast |       |
|--------------------------------------------------------|-----------|-------|---------|-------|---------|-------|-------------------|-------|-----------|-------|-----------|-------|
|                                                        | Coef.     | SE    | Coef.   | SE    | Coef.   | SE    | Coef.             | SE    | Coef.     | SE    | Coef.     | SE    |
| Avg. winter temp.                                      |           |       | -0.073  | 0.237 | -0.967  | 1.039 | 0.119             | 0.172 |           |       |           |       |
| Avg. winter temp. <sup>2</sup>                         |           |       | 0.381   | 0.253 | 1.268   | 0.894 | 0.391             | 0.403 |           |       |           |       |
| Avg. spring precip.                                    | 0.067     | 0.129 | -0.051  | 0.041 |         |       | 0.089             | 0.089 | -0.998    | 0.836 |           |       |
| Avg. spring precip. <sup>2</sup>                       | -0.094    | 0.083 |         |       |         |       |                   |       |           |       |           |       |
| Hot, dry days                                          | -0.302*   | 0.128 | -0.264* | 0.099 |         |       |                   |       | 0.151     | 0.137 | -0.029    | 0.022 |
| Hot, dry days <sup>2</sup>                             | 0.106     | 0.062 | 0.121*  | 0.055 |         |       |                   |       |           |       |           |       |
| Cumulative temp.                                       | 1.034*    | 0.468 |         |       |         |       |                   |       | 1.589     | 1.429 | 1.928     | 1.657 |
| Cumulative temp. <sup>2</sup>                          |           |       |         |       |         |       |                   |       | -2.127    | 1.620 | -2.405    | 1.811 |
| Total annual precip.                                   | -0.141    | 0.283 | -0.046  | 0.176 |         |       |                   |       | 1.192     | 0.981 |           |       |
| Total annual precip. <sup>2</sup>                      | 0.183     | 0.229 | -0.010  | 0.115 |         |       |                   |       |           |       |           |       |
| Temp. variability                                      | 0.365     | 0.596 |         |       |         |       | 0.112             | 0.954 |           |       | 0.813*    | 0.310 |
| Temp. variability <sup>2</sup>                         | 0.131     | 0.483 |         |       |         |       | 0.224             | 0.488 |           |       | -0.473*   | 0.241 |
| Precip. variability                                    |           |       | 0.040   | 0.048 |         |       |                   |       | -0.220    | 0.176 |           |       |
| Precip. variability <sup>2</sup>                       |           |       | 0.012   | 0.019 |         |       |                   |       |           |       |           |       |
| Lag 'ticks' search                                     | 0.168*    | 0.075 | 0.016   | 0.017 | 0.014   | 0.036 | 0.049             | 0.059 | 0.020     | 0.069 | -0.016    | 0.019 |
| Poverty                                                | -0.055    | 0.087 | 0.046   | 0.072 |         |       |                   |       | 0.210     | 0.133 |           |       |
| Percent insured                                        |           |       |         |       |         |       |                   |       |           |       | -0.009    | 0.039 |
| Forest cover                                           | 1.988     | 1.283 | -3.966  | 3.896 | -1.515* | 0.763 | -0.365            | 0.513 |           |       | 0.663     | 0.383 |
| Mixed dev. cover                                       |           |       |         |       |         |       |                   |       | 1.447     | 1.650 | 1.441*    | 0.686 |
| R <sup>2</sup>                                         | 0.728     |       | 0.829   |       | 0.405   |       | 0.327             |       | 0.309     |       | 0.330     |       |
| <b>Model with only climate and dummy variables</b>     |           |       |         |       |         |       |                   |       |           |       |           |       |
| R <sup>2</sup>                                         | 0.681     |       | 0.768   |       | 0.230   |       | 0.137             |       | 0.112     |       | 0.146     |       |
| <b>Model with only non-climate and dummy variables</b> |           |       |         |       |         |       |                   |       |           |       |           |       |
| R <sup>2</sup>                                         | 0.712     |       | 0.820   |       | 0.400   |       | 0.308             |       | 0.258     |       | 0.320     |       |
| <b>Model with only county dummy variable</b>           |           |       |         |       |         |       |                   |       |           |       |           |       |
| R <sup>2</sup>                                         | 0.606     |       | 0.700   |       | 0.156   |       | 0.114             |       | 0.090     |       | 0.149     |       |
| <b>Model with only year dummy variable</b>             |           |       |         |       |         |       |                   |       |           |       |           |       |
| R <sup>2</sup>                                         | 0.045     |       | 0.018   |       | 0.028   |       | 0.014             |       | 0.007     |       | 0.010     |       |

1053 **Table 3.** Model validation metrics for four specifications of models of Lyme disease incidence  
 1054 (see Methods: Model validation). The model validation metrics shown are the root-mean-square  
 1055 error (RMSE) and correlation coefficient (r) for estimated versus observed Lyme disease incidence  
 1056 in the testing data sets. The observed and estimated average ( $\pm 1$  standard deviation) annual Lyme  
 1057 disease incidence is also shown for each region and each model specification. Model validation  
 1058 was performed using data from 2008 – 2017 (the years with complete data for all predictors).  
 1059

|    |                           | <b>Main Model</b> |        |       | <b>Model Spec. 2</b> |        |       | <b>Model Spec. 3</b> |        |       | <b>Model Spec. 4</b> |        |       |
|----|---------------------------|-------------------|--------|-------|----------------------|--------|-------|----------------------|--------|-------|----------------------|--------|-------|
|    | Observed annual incidence | Est. annual inc.  | RMSE   | r     | Est. annual inc.     | RMSE   | r     | Est. annual inc.     | RMSE   | r     | Est. annual inc.     | RMSE   | r     |
| NE | 48.9 $\pm$ 17.4           | 51.3 $\pm$ 13.3   | 38.970 | 0.853 | 51.8 $\pm$ 15.6      | 39.138 | 0.851 | 49.4 $\pm$ 9.4       | 65.419 | 0.458 | 51.2 $\pm$ 13.2      | 38.343 | 0.858 |
| MW | 14.5 $\pm$ 3.2            | 12.7 $\pm$ 2.1    | 15.709 | 0.903 | 12.6 $\pm$ 3.1       | 15.706 | 0.902 | 14.2 $\pm$ 4.0       | 29.023 | 0.602 | 12.7 $\pm$ 2.1       | 15.49  | 0.906 |
| PC | 0.8 $\pm$ 0.3             | 0.8 $\pm$ 0.1     | 1.739  | 0.402 | 0.9 $\pm$ 0.3        | 1.739  | 0.404 | 0.9 $\pm$ 0.1        | 1.777  | 0.282 | 0.8 $\pm$ 0.1        | 1.736  | 0.423 |
| PS | 0.9 $\pm$ 0.6             | 0.8 $\pm$ 0.4     | 1.682  | 0.264 | 0.8 $\pm$ 0.4        | 1.682  | 0.268 | 0.8 $\pm$ 0.2        | 1.316  | 0.321 | 0.8 $\pm$ 0.4        | 1.747  | 0.262 |
| SW | 0.4 $\pm$ 0.3             | 0.4 $\pm$ 0.2     | 5.169  | 0.071 | 0.4 $\pm$ 0.3        | 5.170  | 0.070 | 0.3 $\pm$ 0.2        | 5.131  | 0.040 | 0.4 $\pm$ 0.2        | 5.157  | 0.086 |
| SE | 0.5 $\pm$ 0.2             | 0.5 $\pm$ 0.2     | 1.685  | 0.323 | 0.5 $\pm$ 0.2        | 1.694  | 0.313 | 0.5 $\pm$ 0.2        | 1.725  | 0.172 | 0.5 $\pm$ 0.2        | 1.682  | 0.326 |

1060

1061 **Table 4.** Projected change in the number of Lyme disease cases, relative to hindcasted 2010 –  
 1062 2020 levels, for each region under the upper and moderate climate change scenario. Lyme disease  
 1063 projections incorporate county-level population size projections under SSP2 for 2050 and 2100  
 1064 from Hauer et al. 2019 (see Tables S6 & S7). Point estimates and 95% prediction intervals are  
 1065 shown.  
 1066

|                      | Upper climate change scenario<br>(RCP8.5) |                            | Moderate climate change scenario<br>(RCP4.5) |                             |
|----------------------|-------------------------------------------|----------------------------|----------------------------------------------|-----------------------------|
|                      | 2040 – 2050                               | 2090 – 2100                | 2040 – 2050                                  | 2090 - 2100                 |
| Northeast            | 23,619<br>[2,013, 45,226]                 | 61,776<br>[34,197, 89,354] | 7,415<br>[-14,646, 29,476]                   | -7,385<br>[-36,417, 21,647] |
| Midwest              | -2,470<br>[-10,839, 5,899]                | -4,217<br>[-13,681, 5,247] | 2,504<br>[-5,633, 10,641]                    | 477<br>[-10,305, 11,529]    |
| Pacific              | 48<br>[-218, 315]                         | 104<br>[-379, 587]         | 17<br>[-212, 246]                            | 113<br>[-246, 471]          |
| Pacific<br>Southwest | -84<br>[1,948, 1,780]                     | -239<br>[-2,490, 2,012]    | -11<br>[-1,726, 1,705]                       | 90<br>[-2,012, 2,192]       |
| Southwest            | -148<br>[-1325, 1,029]                    | -608<br>[-2,434, 1,217]    | -133<br>[-1,301, 1,034]                      | -240<br>[-1,884, 1,403]     |
| Southeast            | 991<br>[-236, 2,217]                      | 1,768<br>[-61, 3,597]      | 339<br>[-865, 1,543]                         | 776<br>[-807, 2,339]        |
| US Total             | 22,485<br>[-8,585, 57,451]                | 33,639<br>[-9,916, 77,194] | 10,131<br>[-24,383, 44,645]                  | -6,169<br>[-51,671, 39,581] |

1067  
 1068  
 1069



## 1070 **Figure Legends**

1071

1072 **Figure 1. a)** Regional boundaries designated by US Fish & Wildlife Service. These regions were  
1073 used to analyze spatial variation in the effects of climate conditions on disease outcomes. Map  
1074 recreated from: <https://www.fws.gov/endangered/regions/index.html>. Dashed black lines denote  
1075 the approximate eastern boundary of *Ixodes pacificus* and western boundary of *Ixodes scapularis*  
1076 based on distribution maps created by the CDC. **b)** Regional time series of log Lyme disease  
1077 incidence (the number of cases per 100,000 people in the population) from 2000 – 2017. The  
1078 Mountain Prairie region is not shown here as it was removed from the analysis due to low vector  
1079 presence at the start of the analysis period.

1080

1081 **Figure 2.** Projected change in Lyme disease cases by region for 2040 – 2050 and 2090 – 2100  
1082 under the **a)** upper (RCP8.5) and **b)** moderate (RCP4.5) climate change scenarios. Case changes  
1083 refer to raw case counts rather than incidence and indicate the average change in cases for a  
1084 particular decade relative to hindcasted values for 2010 – 2020. Bars represent 95% prediction  
1085 intervals. Regions are defined in Fig. 1.

1086

1087 **Figure 3.** Projected change in Lyme disease cases for 2100 shown at the county level under the  
1088 **a)** upper (RCP8.5) and **b)** moderate (RCP4.5) climate change scenarios. Case changes refer to  
1089 raw case counts rather than incidence and are relative to hindcasted values for 2010 – 2020. All  
1090 counties within the Mountain Prairie are shown in gray as this region was not included in the  
1091 analysis. Other counties shown in gray (n = 49) containing missing disease, land cover or climate  
1092 data.

1093

1094

a

*Ixodes pacificus**Ixodes scapularis*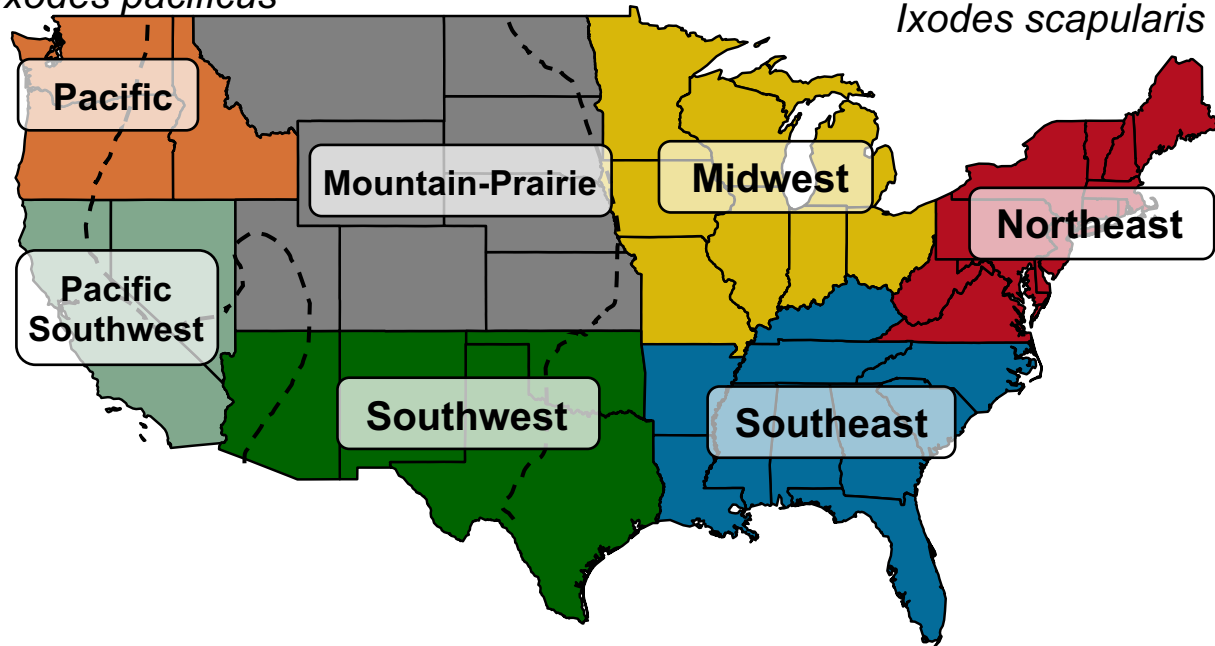

b

## Lyme disease incidence 2000 - 2017

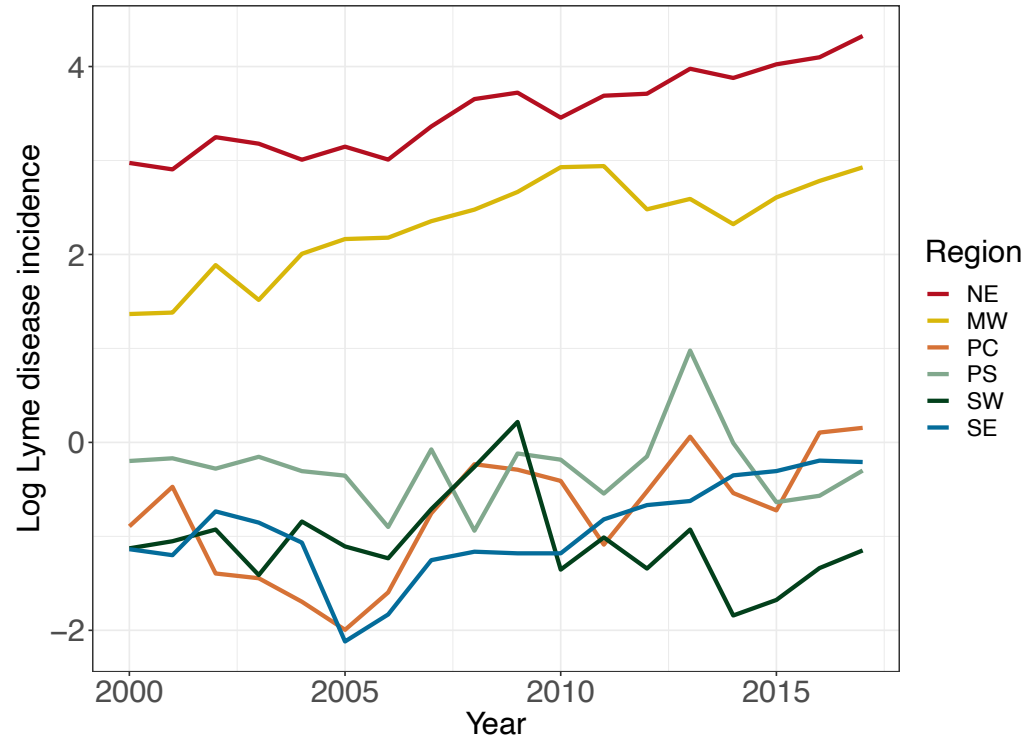

**a** Upper climate change scenario (RCP8.5)

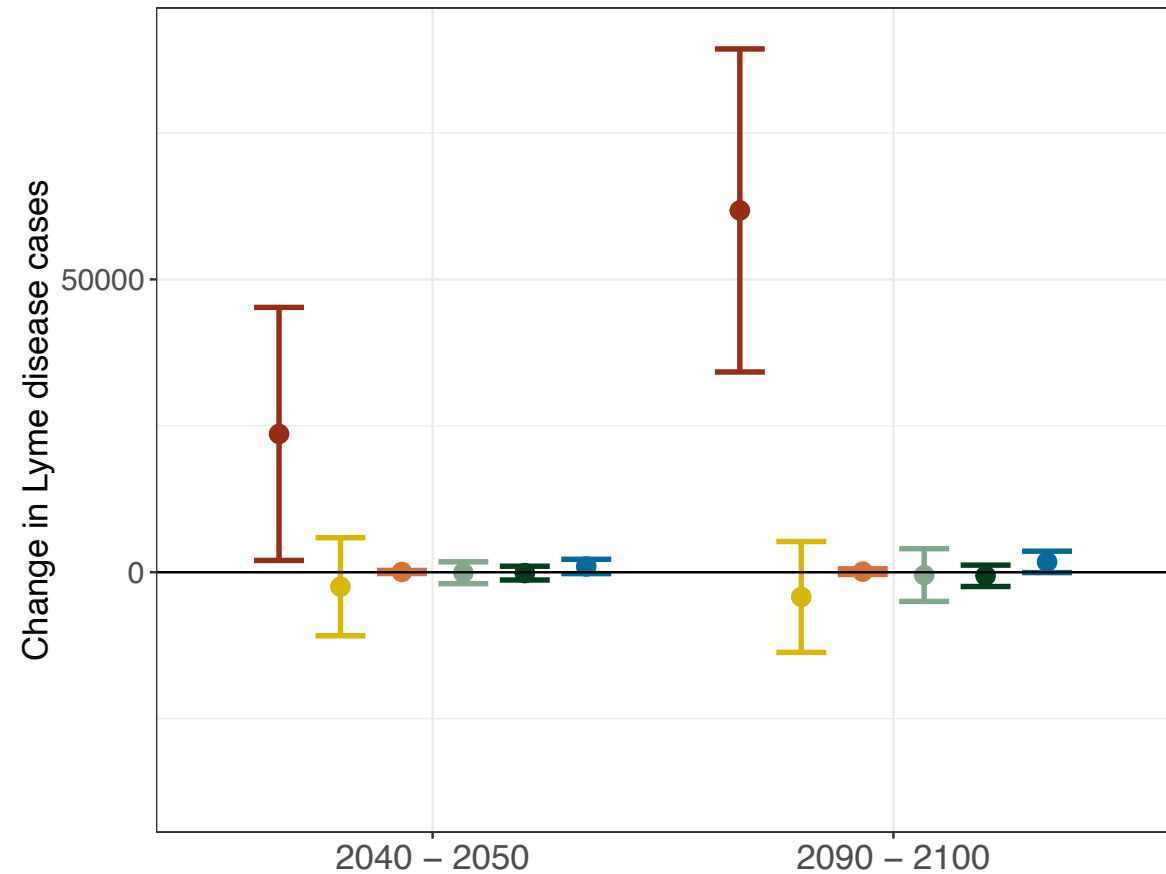

**b** Moderate climate change scenario (RCP4.5)

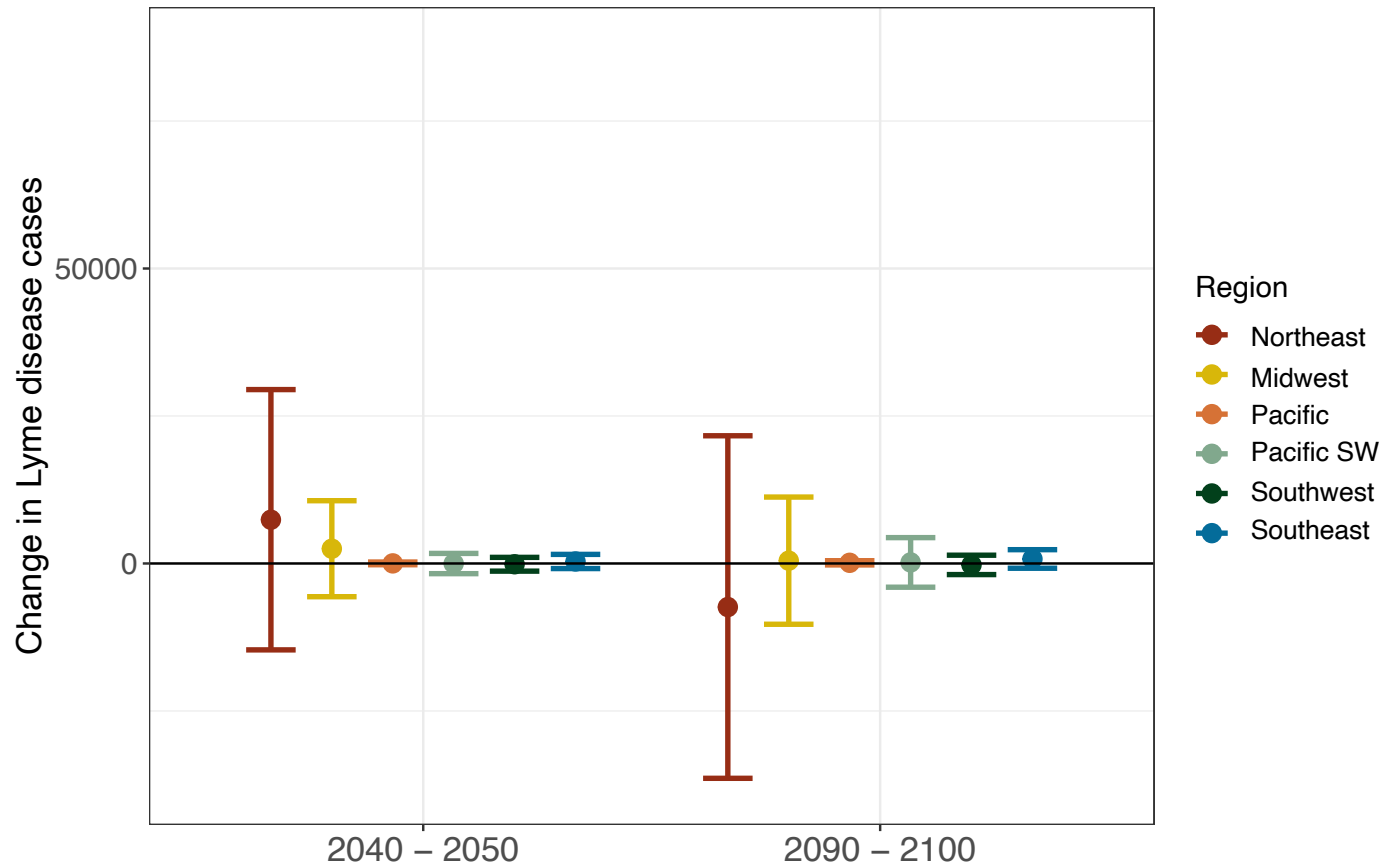

Moderate climate change scenario (RCP4.5)

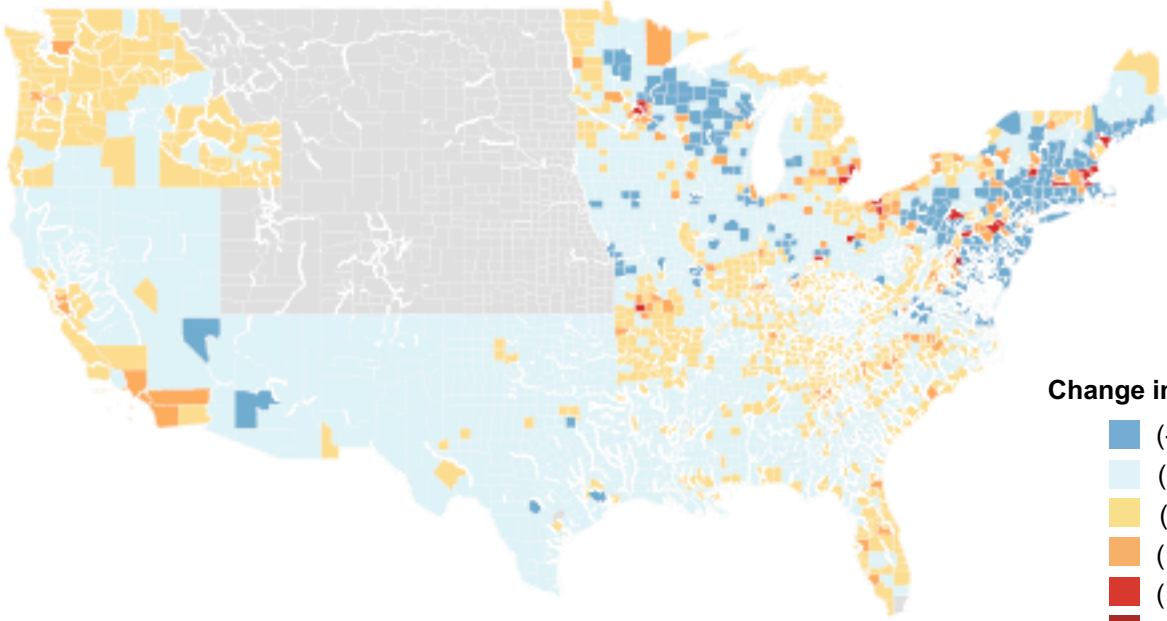

**Change in case counts**

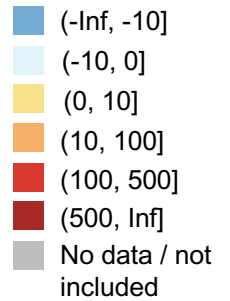

Upper climate change scenario (RCP8.5)

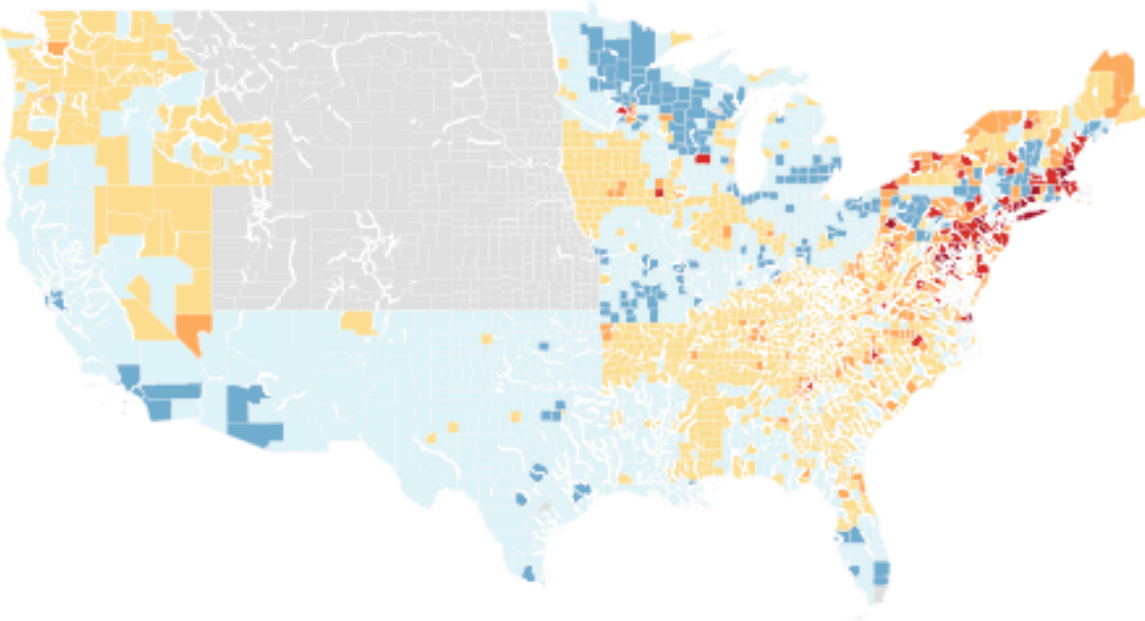

Source: http://biorxiv.org/content/10.1101/2020.01.31.929380v2.full.pdf
