1           **Impact of prior and projected climate change on US Lyme disease incidence**  
2  
3

4 Lisa I. Couper<sup>1</sup>, Andrew J. MacDonald<sup>2</sup>, Erin A. Mordecai<sup>1</sup>  
5  
6

7           **Author affiliations:**

- 8           1. Department of Biology, Stanford University, Stanford, California  
9           2. Earth Research Institute, University of California, Santa Barbara, California

10  
11  
12           **Corresponding author:**

13 Lisa Couper  
14 [lcouper@stanford.edu](mailto:lcouper@stanford.edu)  
15 327 Campus Drive, Stanford, CA 94305  
16  
17

18           *The authors declare they have no actual or potential competing financial interests.*  
19  
20  
21  
22  
23  
24  
25  
26  
27  
28  
29  
30  
31  
32  
33  
34  
35  
36  
37  
38  
39  
40  
41  
42  
43  
44  
45  
46  
47  
48  
49  
50  
51

## 52 Abstract

53

54 **Background:** Lyme disease is the most common vector-borne disease in temperate zones and  
55 a growing public health threat in the US. Tick life cycles and disease transmission are highly  
56 sensitive to climatic conditions but determining the impact of climate change on Lyme disease  
57 burden has been challenging due to the complex ecology of the disease and the presence of  
58 multiple, interacting drivers of transmission.

59

60 **Objectives:** We estimated the impact of prior temperature and precipitation conditions on US  
61 Lyme disease incidence and predicted the effect of future climate change on disease.

62

63 **Methods:** We incorporated 17 years of annual, county-level Lyme disease case data in a panel  
64 data statistical modeling approach to investigate prior effects of climate change on disease  
65 while controlling for other putative drivers. We then used these climate-disease relationships to  
66 forecast Lyme disease cases using CMIP5 global climate models and two potential climate  
67 scenarios (RCP 4.5 and RCP 8.5).

68

69 **Results:** We find that climate is a key driver of Lyme disease incidence across the US, but the  
70 relevant climate variables and their effect sizes vary strongly between regions, with larger  
71 effects apparent in the Northeast and Midwest where Lyme disease incidence has recently  
72 increased most substantially. In both of these regions, key climate predictors included winter  
73 temperatures, spring precipitation, dry summer weather, and temperature variability. Further, we  
74 predict that total US Lyme disease incidence will increase significantly by 2100 under a  
75 moderate emissions scenario, with nearly all of the additional cases occurring in the Northeast  
76 and Midwest.

77

78 **Conclusions:** Our results demonstrate a regionally-variable and nuanced relationship between  
79 climate change and Lyme disease and highlight the need for improved preparedness and public  
80 health interventions in endemic regions to minimize the impact of further climate change-  
81 induced increases in Lyme disease burden.

82

83

## 84 Introduction

85

86 Arthropod-transmitted pathogens and the diseases they cause pose a severe and  
87 growing threat to global public health (World Health Organization 2014). Because vector life  
88 cycles and disease transmission are highly sensitive to abiotic conditions (Mattingly 1969;  
89 Sonenshine and Roe 2013), climate change is expected to alter the magnitude and geographic  
90 distribution of vector-borne diseases (Kilpatrick and Randolph 2012; World Health Organization  
91 2014). Climatic changes, in particular warming temperatures, have already facilitated expansion  
92 of several vector species (e.g., Purse et al. 2005; González et al. 2010; Roiz et al. 2011; Clow et  
93 al. 2017a), and have been associated with increased vector-borne disease incidence (e.g.,  
94 Loevinsohn 1994; Subak 2003; Hii et al. 2009). Identifying areas of high risk for current and  
95 future vector-borne disease transmission under climate change is critical for mitigating disease  
96 burden. However, the presence of interacting drivers of disease transmission such as land use  
97 change and globalization, and the complex ecology of vector-borne disease make this effort  
98 challenging (Lafferty and Mordecai 2016; Mills et al. 2010; Ostfeld and Brunner 2015; Rogers  
99 and Randolph 2006; Tabachnick 2010).

100

101

102

This challenge is particularly apparent in the case of Lyme disease, the most common  
vector-borne disease in temperate zones (Kurtenbach et al. 2006; Rizzoli et al. 2011;  
Rosenberg et al. 2018), because transmission depends on a complex sequence of biotic

103 interactions between vector and numerous host species that may respond differently to  
104 environmental change (Ostfeld 1997). In the US, Lyme disease is caused by the bacteria  
105 *Borrelia burgdorferi*, and is vectored by two tick species: *Ixodes scapularis* in the eastern and  
106 midwestern US and *Ixodes pacificus* in the western US. After hatching from eggs, both tick  
107 species have three developmental stages—larvae, nymph, and adult—during which they take a  
108 single blood meal from a wide range of vertebrate hosts before transitioning to the next  
109 developmental stage or reproducing (Sonenshine and Roe 2013). This life cycle takes 2-3 years  
110 to complete, 95% of which is spent at or below the ground surface in diapause, seeking a host,  
111 digesting a blood meal, or molting (Ostfeld and Brunner 2015; Sonenshine and Roe 2013).

112 Given their long life spans, inability to regulate their body temperature, and high degree  
113 of interaction with the physical environment, ticks are highly sensitive to changes in climatic and  
114 weather conditions (Sonenshine and Roe 2013). Prior research has demonstrated that  
115 temperature and moisture conditions at the ground surface strongly influence tick mortality,  
116 development, and host-seeking abilities (Ostfeld and Brunner 2015). In particular, high  
117 temperatures and low humidity decrease *I. scapularis* and *I. pacificus* survival (Bertrand and  
118 Wilson 1996; Nieto et al. 2010; Stafford 1994) and host-seeking activity (Lane et al. 1995;  
119 MacDonald et al. 2019b; Schulze et al. 2001; Vail and Smith 1998), while cold temperature  
120 extremes cause significant mortality (Lindsay et al. 1995; Vandyk et al. 1996). Accordingly,  
121 temperature and precipitation are important predictors of these tick species' latitudinal and  
122 altitudinal range limits (Berger et al. 2014a; Brownstein et al. 2003; Estrada-Peña 2002;  
123 Leighton et al. 2012; McEnroe 1977; Ogden et al. 2005), and changes in climatic conditions  
124 have been associated with northward range shifts of *I. scapularis* (Clow et al. 2017b, 2017a;  
125 Ogden et al. 2014a).

126 While the movement of vector species to higher latitudes suggests an associated  
127 impending increase in Lyme disease with further climate warming, the direct impacts of climate  
128 on Lyme disease cases are difficult to measure given the influence of many non-climate related  
129 factors (Kilpatrick et al. 2017). As a result, the few studies that have attempted to determine the  
130 impact of climate conditions on Lyme disease incidence have yielded conflicting results. For  
131 example, studies have found positive associations between incidence and each of the following:  
132 average spring precipitation (McCabe and Bunnell 2004), June moisture index in the region two  
133 years prior (Subak 2003), fewer dry summer days (Burtis et al. 2016), warmer winter  
134 temperatures in the prior year (Subak 2003), and increasing average annual temperature  
135 (Dumic and Severnini 2018; Robinson et al. 2015). However, others failed to detect an effect of  
136 temperature on incidence (McCabe and Bunnell 2004; Schaubert et al. 2005), found the timing  
137 of climatic changes to be inconsistent with the timing of variation in Lyme disease cases  
138 (Randolph 2010), were limited in geographic scope (Burtis et al. 2016; Dumic and Severnini  
139 2018; McCabe and Bunnell 2004; Robinson et al. 2015; Subak 2003) and/or used modeling  
140 techniques that did not account for confounding variables that might influence disease incidence  
141 (Subak 2003; McCabe and Bunnell 2004). Further, while the rise in Lyme disease cases in the  
142 US has occurred concurrently with climatic changes promoting tick suitability, demonstrating  
143 causal relationships is challenging (Ostfeld and Brunner 2015). This has led others to argue that  
144 climate change is merely the backdrop for rising tick-borne disease incidence (Randolph 2010),  
145 while other factors such as increasing physician awareness are the true drivers of increased  
146 disease burden (Morshed et al. 2006; Scott and Scott 2018). Nonetheless, a recent CDC study  
147 on vector-borne disease burden in the US showed a dramatic rise in Lyme disease (Rosenberg  
148 2018), and much of the extensive media coverage of this report asserted the role of climate  
149 change. Despite this media attention, as well as strong known relationships between climate  
150 conditions and key features of vector ecology, the evidence for climate change as a driver of  
151 increasing Lyme disease incidence in the US remains equivocal.

152 In this study, we investigate the role of past climatic conditions on Lyme disease  
153 incidence across the US using a 17-year, county-level Lyme disease case reporting dataset and

154 explicitly controlling for other drivers of disease burden. Specifically, we ask: How has  
155 interannual variation in climate conditions contributed to changes in Lyme disease incidence?  
156 We include climate variables capturing changes in temperature and precipitation conditions and  
157 investigate how relationships between climate and Lyme disease outcomes vary across  
158 different regions of the US. To avoid drawing spurious conclusions about the effects of climate,  
159 we analyze the effects of other known and potential drivers of disease incidence such as  
160 changing forest cover, public awareness of tick-borne disease, and health-seeking behavior,  
161 and use a statistical approach that explicitly accounts for unobserved heterogeneity in disease  
162 incidence between counties and years. We then use these modeled, regionally-specific  
163 relationships between climate and Lyme disease burden to ask: How is US Lyme disease  
164 incidence expected to change under future climate scenarios? We report the predicted change  
165 in Lyme disease incidence for individual US regions in 2040 – 2050 and 2090 – 2100 relative to  
166 hindcasted 2010 – 2020 levels under two potential climate scenarios: RCP 8.5, which reflects  
167 the upper range of the literature on emissions, and RCP 4.5, which reflects a moderate  
168 mitigation scenario (Hayhoe et al. 2017).  
169

## 170 **Methods**

171

### 172 **Lyme disease case data**

173

174 We obtained annual, county-level reports of Lyme disease cases spanning 2000 to 2017  
175 from the US Centers for Disease Control and Prevention (CDC) (Supplementary Methods).  
176 These disease case data provide the most spatially-resolved, publicly available surveillance  
177 data in the US. Raw case counts were converted to incidence—the number of cases per  
178 100,000 people—for each year using annual county population sizes from the US Census  
179 Bureau (USCB).  
180

181

### 181 **Climate data**

182

183 We calculated the following variables to capture climate conditions relevant for tick-  
184 borne disease transmission: average winter temperature lagged one year; average spring  
185 precipitation; the number of hot, dry days in May – July; cumulative average temperature;  
186 cumulative daily precipitation; temperature variance; and precipitation variance (Table 1).  
187 Details about how these variables were calculated and their biological relevance are listed in  
188 Table 1. For past climate conditions, we obtained daily, county-level average temperature and  
189 total precipitation data from the National Oceanic and Atmospheric Administration (NOAA)  
190 weather stations accessed via the CDC's Wide-ranging Online Data for Epidemiological  
191 Research (WONDER) database.

192

193 To estimate future climate variables, we used CMIP5 modeled temperature and  
194 precipitation data available from NASA Goddard Institute for Space Studies global climate  
195 models (Schmidt et al. 2014). Specifically, we obtained estimates of daily near-surface air  
196 temperature and precipitation through 2100 under the upper climate change scenario (RCP 8.5)  
197 and a moderate climate change scenario (RCP 4.5) (Taylor et al. 2012; van Vuuren et al. 2011).  
198 These climate scenarios are relatively similar in the radiative forcing levels assumed through  
199 2050 but diverge substantially in the latter half of the century. Climate estimates from these two  
200 scenarios are provided at a 2° x 2.5° resolution; values were then ascribed to counties based on  
201 county latitude and longitude (Supplementary Methods). Mean values for hindcasted and  
202 forecasted climate variables for each region are listed in Supplementary Table 1.

203

### 203 **Awareness data**

204

205

206

207

208

209

210

211

212

213

214

215

216

217

218

219

220

221

222

223

224

225

226

227

228

229

230

231

232

233

234

235

236

237

238

239

240

241

242

243

244

245

246

247

248

249

250

251

252

253

254

We controlled for variation in public awareness of ticks and Lyme disease using data from Google trends on the frequency of “ticks” as a search term. We obtained data on “ticks” search frequency, normalized for a given location and year, for 2004 (the first year the data were available) to 2017. We also initially used “tick bite”, and “Lyme disease” as search terms, but found that these generated nearly identical coefficient estimates, thus we proceeded to use only the “ticks” search term as a predictor. Search frequency data were aggregated at the designated market area (DMA), the smallest spatial scale available. Search frequency values for a given DMA, which contained an average of 14 counties, were thus applied equally to all counties therein. We also calculated a 1-year lagged version of the tick search variable, as awareness of tick-borne disease is likely endogenous to disease reporting, and using predetermined values reduces endogeneity concerns (Bascle 2008).

### **Health-seeking behavior data**

We explicitly controlled for variation in health-seeking behavior, previously posited as a driver of Lyme disease reporting (Armstrong et al. 2001; Wilking and Stark 2014) by including the following three variables: diabetes incidence, health insurance coverage, and poverty. Diabetes was selected as a healthcare-seeking proxy as the behavioral drivers of healthcare seeking that drive diabetes reporting are likely to be similar to those of Lyme disease. Namely, the early symptoms of diabetes are often vague (Harris and Eastman 2000) and an individual's ability and decision to seek healthcare plays a large role in whether their case is recorded, as reflected in the substantial underreporting of this disease (Anwar et al. 2011; Doshi et al. 2010; Harris and Eastman 2000). We obtained annual, county-level data for 2004 to 2015 on the percentage of adults aged 20+ years diagnosed with type 1 or type 2 diabetes from the CDC's US Diabetes Surveillance System. To capture variation in healthcare access, we included the annual percentage of county residents with any form of health insurance coverage using data for 2005 to 2017 provided by the USCB's Small Area Health Insurance Estimates (SAHIE) program. Lastly, we used data from the USCB to include the percentage of county residents living in poverty as a predictor, as poverty has been significantly negatively associated with healthcare-seeking behavior (Bourne 2009; Kirby and Kaneda 2005).

### **Land cover data**

We included two land cover variables putatively associated with higher tick-borne disease risk: the percent forest in a given county and year, and the percent mixed development (Brownstein et al. 2005b; Dister and Fish 1997; Frank et al. 1998; Glass et al. 1995; Killilea et al. 2008; MacDonald et al. 2019a). We calculated these variables using 30-m resolution land cover data from the US Geological Survey (USGS) National Land Cover Database (NLCD) (Yang et al. 2018). Percent forest included any deciduous, evergreen, or mixed forest. Mixed development was defined as areas with a mixture of constructed materials and vegetation, including lawn grasses, parks, golf courses, and vegetation planted in developed settings. We calculated county-level values of these land cover variables for 2001, 2004, 2006, 2008, 2011, 2013, and 2016 as these are the only years the NLCD dataset is currently available.

To estimate future land cover variables, we used USGS land cover projections available through 2100 (Sohl et al. 2014). We used modeled land cover data from two land-use change scenarios corresponding to the Intergovernmental Panel on Climate Change (IPCC) Special Report on Emission Scenarios (SRES). We used scenario B1, which reflects lower urban development, to align with the moderate climate change scenario (RCP 4.5), and scenario A1B, which reflects higher urban development and forest clearing, to align with the upper climate change scenario (RCP 8.5) (Nakicenovic et al. 2000; Rogelj et al. 2012; Sohl et al. 2014). Using

255 these data, we again calculated annual, county-level values of percent forest cover and mixed  
256 development. However, as the ‘mixed development’ land cover class was not included in the  
257 projected data, we instead used the ‘mechanically disturbed’ public or private land cover class  
258 (Supplementary Methods).

## 259 260 **Regional divisions**

261  
262 Given the large variation in climatic conditions across the US, as well as variation in  
263 ecological dynamics of tick-borne disease such as tick species identity, tick densities, tick  
264 questing behavior, and host community composition (Eisen et al. 2016; Kilpatrick et al. 2017;  
265 Ostfeld 1997; Salkeld and Lane 2010), we examined regional differences in climate-disease  
266 relationships. We used the US Fish & Wildlife Service regional boundaries to divide the US into  
267 the following seven regions for analysis: Northeast, Midwest, Mountain Prairie, Pacific, Pacific  
268 Southwest, South, and Southeast (Figure 1). These regional divisions were selected as  
269 they roughly correspond to genetic structuring of *I. scapularis* and *I. pacificus* (Humphrey et al.  
270 2010; Kain et al. 1997, 1999) and are likely distinct in environmental conditions and resources  
271 (Ricketts et al. 1999; Smith et al. 2018). Further, each region contains only one vector species:  
272 *I. scapularis* in the Northeast, Midwest, Southeast, and Southwest, and *I. pacificus* in the Pacific  
273 and Pacific Southwest (Dennis et al. 1998). As neither species has an established presence in  
274 the Mountain Prairie, this region was removed from the analysis. Regional descriptions,  
275 including the population size (as of 2017), the number of counties, and the average climate  
276 conditions, are provided in Supplementary Table 2.

## 277 278 **Statistical approach**

279  
280 We used a least squares dummy variable (termed “fixed-effects” in econometrics)  
281 regression approach to estimate changes in Lyme disease incidence using repeated  
282 observations of the same groups (counties) from 2000 – 2017 (Larsen et al. 2019). We included  
283 ‘county’ and ‘year’ as dummy variables to control for any unobserved heterogeneity that may  
284 influence reported Lyme disease burden in a particular county across all years (e.g., number of  
285 health care providers), or influence Lyme disease in all counties in a given year (e.g., changes  
286 in disease case definition). All counties (n = 2,232) for which there was complete data on Lyme  
287 disease cases, climate, and other predictors were included.

288 To account for regional variation in the predictors of tick-borne disease incidence  
289 (Raghavan et al. 2014; Wimberly et al. 2008), we ran separate models for each US region (see  
290 Methods: Regional divisions). We used stepwise variable selection, in which variables were  
291 added if they reduced model Akaike information criterion (AIC) by 2 or more, to identify the  
292 climate, land cover, and non-ecological predictors that best explained Lyme disease incidence  
293 in each region (Yamashita et al. 2007; Zhang 2016). We assessed the multicollinearity of these  
294 models by calculating the variance inflation factor (VIF). No predictors had VIF values greater  
295 than 10 after the stepwise variable selection procedure, thus we did not remove any variables  
296 from the final models due to high collinearity (Hair et al. 2014).

297 We accounted for spatial autocorrelation of observations by using cluster-robust  
298 standard errors. This nonparametric approach accounts for arbitrary forms of autocorrelation  
299 within a defined “cluster” to avoid misleadingly small standard errors and test statistics  
300 (Cameron and Miller 2015). We specified clusters as US Agricultural Statistics Districts (ASDs)  
301 as these districts contain contiguous counties grouped by similarities in soil type, terrain, and  
302 climate. When reporting on the significance of a predictor, we use standard errors and p-values  
303 calculated using this correction.

## 304 305 **Lyme disease forecasting**

306  
307 We forecasted Lyme disease incidence using the climate and land cover variables  
308 included in the best model for each region as well as a county dummy variable. Non-ecological  
309 predictors were not included as projections for these variables are unavailable. Using these  
310 models, we obtained regional estimates for Lyme disease incidence under the upper and  
311 moderate climate change scenarios (RCP 8.5 and RCP 4.5) for 2040 – 2050 and 2090 – 2100.  
312 We calculated county-level changes in Lyme disease incidence by subtracting modeled  
313 incidence for 2010 – 2020 from forecasted incidence generated using the same modeled  
314 climate and land cover data sources. We converted predicted Lyme disease incidence to cases  
315 by assuming county population sizes remained the same as those in 2017. As the USCB  
316 projects a 75% increase in US population size by 2100 (under the most likely scenario regarding  
317 fertility, mortality, immigration, and emigration rates) (U.S. Census Bureau 2000), our estimates  
318 on the number of additional Lyme disease cases are conservative. To generate rough  
319 predictions of Lyme disease case counts under population growth, we provide estimates that  
320 assume a 75% increase in population size relative to 2017 within each county. We report point  
321 estimates and 95% prediction intervals when discussing predicted changes in Lyme disease  
322 case counts.

### 323 324 **Model validation**

325  
326 We assessed predictive model accuracy by comparing hindcasted Lyme disease  
327 incidence under both emissions scenarios to observed values for 2008 – 2017 (Clark et al.  
328 2001; Judge et al. 1985). We also compared model accuracy under varying model  
329 specifications. In the first specification, each regional model contained the predictors (climate,  
330 land cover, and non-ecological) determined through variable selection (see Methods: Statistical  
331 approach) as well as county and year dummy variables. In the second specification, each  
332 regional model contained all available predictors (7 climate predictors, 2 land cover predictors,  
333 and 4 non-ecological predictors) and the county and year dummy variables. Under the third  
334 specification, regional models contained all available predictors but no dummy variables. Under  
335 each of these specifications, we created models of Lyme disease incidence on a training  
336 dataset containing a randomly selected 75% subset of counties and years and used the  
337 withheld 25% of observations for validation (Caldwell et al. 2016; Hijmans 2012). To evaluate  
338 the performance of each model specification, we calculated the root-mean-square error and  
339 correlation coefficient between predicted and actual Lyme disease incidence for 2006 – 2013  
340 (the years with complete data for all predictors) for each regional model.

341 To capture any non-linear relationships between climate predictors and Lyme disease  
342 incidence, we also generated models using quadratic versions of the climate predictors where  
343 applicable. Specifically, we used the stepwise variable selection approach starting with  
344 quadratic and linear versions of each climate variable to again determine the best model for  
345 each region. We then used these models to forecast Lyme disease incidence in 2090 - 2100  
346 under both the upper and moderate climate change scenarios.

### 347 348 349 **Results:**

#### 350 351 **Climate and Lyme disease incidence**

352  
353 At least one climate variable was included in the best model of Lyme disease incidence  
354 for all US regions with vector species present (Table 2). However, the specific climate variables  
355 included in the model varied between regions. Variables capturing precipitation conditions, such  
356 as cumulative precipitation or average spring precipitation, were included in models of Lyme

357 disease incidence in the Southwest, Southeast, and Pacific regions. Conversely, only average  
358 winter temperature was predictive of Lyme disease incidence in the Pacific Southwest. In the  
359 Northeast and Midwest, multiple temperature and precipitation variables such as the number of  
360 hot dry days, average spring precipitation, average winter temperature, and temperature  
361 variance were included. Further, cumulative temperature was included in the Northeast model  
362 while cumulative precipitation was included in the Midwest. Where included, average winter  
363 temperature and cumulative temperature were positive predictors of Lyme disease incidence,  
364 while average spring precipitation and precipitation variance were negative predictors. The  
365 effects of cumulative precipitation, temperature variance, and the number of hot, dry days varied  
366 between regions.

### 367 368 **Non-climate predictors and Lyme disease incidence**

369  
370 For all regions, the best model of Lyme disease incidence included tick awareness,  
371 diabetes incidence, and a land cover variable (Table 2). Specifically, the 1-year lagged tick  
372 search frequency was included rather than the contemporary equivalent as it led to greater  
373 reductions in model AIC. This tick awareness variable was a positive predictor in all regions.  
374 County-level diabetes incidence was a negative predictor in the Northeast, Midwest, and  
375 Southeast, and a positive predictor in the Pacific, Pacific Southwest, and Southwest. The  
376 percent land cover classified as mixed development was included in the best model for the  
377 Northeast (negative predictor), and for the Pacific Southwest and Southwest (positive predictor),  
378 while the percent forest cover was included in the Midwest and Pacific (negative predictor), and  
379 in the Southeast (positive predictor). The other available non-climate predictors—county-level  
380 poverty and health insurance coverage—did not meet the criteria for inclusion in any regional  
381 models (see Methods: Statistical approach).

382 The above predictors were included in each regional model of incidence along with  
383 county and year dummy variables. A large portion of the variance in incidence for each region  
384 was explained by the county dummy variable (Table 2), indicating that unobserved county-level  
385 heterogeneity is a large driver of variable Lyme disease incidence.

### 386 387 **Model Validation**

388  
389 Hindcasted Lyme disease incidence matched the observed values with reasonable  
390 accuracy overall, with greater correlation between estimated and observed values in higher  
391 incidence regions (Northeast and Midwest) than in lower incidence regions (Pacific, Pacific  
392 Southwest, Southwest, and Southeast) (Table 3 and Supplementary Figure 1). For all regions,  
393 total estimated Lyme disease incidence was within 8.9% of the observed total incidence.  
394 Further, the correlation between estimated Lyme disease incidence for a particular county and  
395 year and the observed values were 0.86 and 0.90 for the Northeast and Midwest, respectively.  
396 In the lower incidence regions, the correlation coefficients were 0.51, 0.34, 0.34, and 0.49 for  
397 the Pacific, Pacific Southwest, Southwest, and Southeast, respectively. While the point  
398 estimates for hindcasted Lyme disease incidence tended to closely match the observed values,  
399 the prediction intervals around these estimates were large, particularly for the lower incidence  
400 regions.

401 Predictive accuracy also varied across the three model specifications evaluated here. As  
402 expected, the model specification without county and year dummy variables had higher root-  
403 mean-square error or lower correlation coefficients for nearly all regions, indicating lower  
404 predictive accuracy (Supplementary Table 3). However, the two model specifications with  
405 county and year dummy variables—the main model specification in which predictors were  
406 determined through variable selection, and the alternative model specification containing all  
407 possible predictors—were very similar in their predictive accuracy. The simpler, variable



408 selection-based model specification was thus selected for the remaining analysis to minimize  
409 overfitting and decrease transferability concerns (Allen and Fildes 2001; Wenger et al. 2011;  
410 Wenger and Olden 2012), but forecasting results from both model specifications are shown in  
411 Supplementary Table 4. Forecasting results from the alternative model specification with all  
412 ecological predictors suggest smaller changes and higher uncertainty in Lyme disease  
413 incidence for each region, compared to the main model specification.

414 Several regional models were improved through replacing linear climate predictors with  
415 quadratic climate predictors. Specifically, after repeating the variable selection approach  
416 including quadratic and linear climate terms, the Northeast incidence model now included  
417 quadratic terms for average spring precipitation and cumulative temperature; the Southwest  
418 models included quadratic terms for cumulative precipitation, average spring precipitation and  
419 precipitation variance; and the Midwest models included quadratic terms for hot dry days,  
420 average winter temperature, average spring precipitation, cumulative precipitation, and  
421 temperature variance. The Pacific, Pacific Southwest, and Southeast incidence models were not  
422 improved through the inclusion of quadratic climate predictors. Forecasting results from models  
423 including these non-linear climate variables are similar to those with linear predictors under the  
424 moderate climate change scenario, although with smaller predicted changes in incidence  
425 (Supplementary Table 5). Forecasting results differ more substantially under the upper climate  
426 change scenario, with non-significant decreases predicted for the Northeast and Southeast  
427 when quadratic climate predictors are included, but significant increases predicted for these  
428 regions under the original model. As the climate predictors used in this study were drawn from  
429 the prior literature on climate and Lyme disease cases (see Table 1), in which linear versions of  
430 climate predictors were used, we use output from the linear models when presenting forecasting  
431 results (but see Supplementary Table 5).

432

433

#### 434 **Forecasted Lyme disease incidence**

435

436 Under the upper climate change scenario (RCP 8.5), the total number of Lyme disease  
437 cases in the US is predicted to increase by 17,672 [-13322, 48666] by 2040 – 2050 and 27,630  
438 [-6468, 61727] by 2090 – 2100 (Figure 2, Table 4). These case changes are relative to  
439 hindcasted 2010 – 2020 case counts and are based on 2017 population sizes. For the moderate  
440 climate change scenario (RCP 4.5), the predicted increases in cases for 2040 – 2050 and 2090  
441 – 2100 were 15,395 [-15493, 46284] and 34,183 [1124, 67243], respectively. These results  
442 indicate that substantial future increases in US Lyme disease burden are likely, although the  
443 prediction intervals around these estimates are large, and overlap zero except under the  
444 moderate climate change scenario for 2090 – 2100. Further, the expected change in incidence  
445 varies strongly by region (Figures 2-3). Significant increases in cases are predicted in the  
446 Northeast by 2090 – 2100 under both climate change scenarios (29,813 [8311, 51315] under  
447 RCP 8.5 and 25,565 [4697, 46434] under RCP 4.5) and for the Southeast under the upper  
448 climate change scenario only (1,248 [252, 2244]). Modest, non-significant increases or  
449 decreases are predicted for the Pacific, Pacific Southwest and Southwest under both scenarios.  
450 For the Midwest, an increase in cases is predicted under the moderate climate change scenario  
451 (8,872 [-66, 17810]) while a decrease is predicted under the upper scenario (-3,432 [-12688,  
452 5823]). While both of these predictions were not statistically distinguishable from zero, these  
453 results suggest there may be nonlinear effects of climate change in this region.

454 These predicted changes in Lyme disease case counts are likely conservative as  
455 estimates are based on 2017 population sizes. By assuming equal population growth across the  
456 US, at levels predicted by the USCB, we find the total number of Lyme disease cases in the US  
457 may increase by 48,545 [-11365, 108455] by 2100 under the upper climate change scenario  
458 and 60,020 [1974, 118146] under the moderate scenario (Supplementary Table 6). However, as

459 the degree of population growth is highly uncertain, and population growth will vary in  
460 magnitude and direction by county, this analysis was largely exploratory. Further, as with the  
461 predictions assuming no population growth, the large prediction intervals around the point  
462 estimates here indicate the future effects of climate change on Lyme disease incidence are  
463 highly uncertain.

464  
465

## 466 Discussion

467

468 Vector-borne diseases are inherently sensitive to climatic conditions, making accurately  
469 estimating effects of climate change on disease burden a public health priority. We found that  
470 climate was a key predictor of Lyme disease incidence in all US regions with established vector  
471 species (Northeast, Midwest, Pacific, Pacific Southwest, Southwest, and Southeast) in the past  
472 17 years. However, the specific climate variable(s) predictive of Lyme disease incidence varied  
473 between regions. In general, the climate variables predictive of disease incidence for a given  
474 region tended to reflect climate conditions within the region and known relationships between  
475 tick life cycles and climate (reviewed in Eisen et al. 2016). For instance, in the Southeast and  
476 Southwest regions, which have the warmest and driest conditions during the tick questing  
477 period (Supplementary Tables 1-2), climate variables capturing precipitation conditions (e.g.,  
478 cumulative precipitation) were key predictors of Lyme disease incidence. In the colder and more  
479 thermally variable Northeast and Midwest regions, climate variables capturing limiting  
480 temperatures (e.g., average winter temperatures and temperature variance) were predictive of  
481 Lyme disease.

482 These regionally-specific climate and Lyme disease relationships are consistent with a  
483 large body of literature on the physiology and ecology of the US vectors of Lyme disease, *I.*  
484 *scapularis* and *I. pacificus*. In particular, many prior studies have demonstrated substantial  
485 decreases in tick survival and questing activity under low moisture conditions (Berger et al.  
486 2014b, 2014a; Jones and Kitron 2000; Knülle and Rudolph 1982; Needham and Teel 1991;  
487 Rodgers et al. 2007; Stafford 1994). Thus, variation in precipitation may have a greater impact  
488 on Lyme disease incidence in drier regions, as observed in this study, through changes in tick  
489 abundance and tick-human contact rates. Also consistent with the results of this study,  
490 extensive prior research indicates that cold winter and annual temperatures are associated with  
491 longer development periods and/or higher tick mortality (Brownstein et al. 2003; Estrada-Peña  
492 2002; Leighton et al. 2012; McEnroe 1977; Ogden et al. 2004), reduced host-seeking abilities of  
493 the adult life stage (Carroll and Kramer 2003; Clark 1995; Duffy and Campbell 1994), and  
494 reduced abundance of the white-footed mouse, a key reservoir host species (Wolff 1996).  
495 Similarly, studies have found that warming temperatures at high latitudes contribute to quicker  
496 tick development rates, increased survival, and range expansion (Brownstein et al. 2003; Clow  
497 et al. 2017a; Leighton et al. 2012; Lindsay et al. 1995; Ogden et al. 2004; Rand et al. 2004).  
498 These studies suggest that milder winters would be associated with increasing Lyme disease  
499 incidence, with the largest effects observed in cooler regions, as detected in this study.

500 In addition to supporting prior literature on climate and tick ecology, the effects of climate  
501 conditions on Lyme disease incidence were detected while controlling for non-climate predictors  
502 of disease. In particular, we explicitly controlled for variation in human awareness of ticks, land  
503 use, a proxy for health-seeking behavior, and other unobserved heterogeneity between US  
504 counties and years in our modeling approach. Increasing tick awareness, as determined by the  
505 frequency of tick-related Google searches, was generally positively associated with Lyme  
506 disease incidence, while land cover and health-seeking behavior predictors had regionally-  
507 variable relationships. By controlling for these effects, we provide strong evidence that the  
508 positive effect of warming temperatures on Lyme disease in colder regions is not simply driven  
509 by increasing human awareness of tick-borne disease, temporal trends, or other concurrent

510 changes as has been previously suggested (Morshed et al. 2006; Randolph 2010; Scott and  
511 Scott 2018).

512 While our statistical models included both climate and non-climate predictors of Lyme  
513 disease incidence, model accuracy varied widely between regions. Most notably, model  
514 accuracy was substantially greater for endemic regions (Northeast and Midwest), compared to  
515 low incidence regions (Pacific, Pacific Southwest, Southwest, and Southeast) (Ciesielski et al.  
516 1988). The relatively poor predictive accuracy in non-endemic regions may be due to higher  
517 misdiagnosis rates and/or higher travel-associated Lyme disease transmission (Eldin and  
518 Parola 2018; Parola and Paddock 2018) decoupling the relationship between local conditions  
519 and disease. However, evidence suggests that most Lyme disease transmission occurs in the  
520 peri-domestic environment, in which the county of transmission and reporting are likely to be the  
521 same (Connally et al. 2009; Falco and Fish 1988; Jackson et al. 2006; Maupin et al. 1991). The  
522 lower predictive accuracy in these regions more likely reflects a lack of sufficient annual  
523 variation in Lyme disease incidence needed to detect effects of climate in these regions, and/or  
524 weaker effects of climate conditions on Lyme disease transmission relative to confounding  
525 drivers not included in our model such as host movement and community composition. In  
526 contrast, the largest effect of climate on disease transmission is expected at the edges of the  
527 climate suitability for transmission (Githeko et al. 2000). As the Northeast and Midwest are near  
528 the *I. scapularis* northern range limit, the higher model accuracy here likely indicates stronger  
529 climate-Lyme disease relationships. Supporting this assertion, more climate variables were  
530 included as predictors after variable selection in these regions than in low incidence regions.

531 Our Lyme disease forecasts, made using regionally-specific incidence models and  
532 projected climate and land cover data, suggest that climate change may lead to substantial  
533 increases in incidence in coming decades, but that the magnitude of these effects is highly  
534 uncertain and depend on assumptions about the functional form of climate-disease  
535 relationships. Across the US, an estimated additional 34,183 cases [95% PI: 1124, 67243] are  
536 predicted by 2100 under a moderate climate change scenario (RCP 4.5), representing a 92%  
537 increase in Lyme disease burden relative to 2010 – 2020 levels. These estimates are likely to  
538 be conservative as they relied on 2017 county population sizes. Applying predicted US  
539 population growth rates to all counties equally increases this estimate to 60,020 [95% PI:  
540 1974,118146] additional cases by 2100 under the moderate scenario. The overwhelming  
541 majority of this increase would be experienced in the Northeast and Midwest while minimal  
542 changes are expected elsewhere. Under the upper climate change scenario (RCP 8.5), Lyme  
543 disease incidence is predicted to increase in the Northeast and Southeast by 2100, while  
544 changes are not statistically distinguishable from zero in other regions and for the US as a  
545 whole. However, the large prediction intervals suggest high uncertainty in future Lyme disease  
546 incidence, which could include either increases or decreases that could be regionally-specific.  
547 Further, the forecasting results differ, particularly for the upper climate change scenario, when  
548 generated assuming non-linear climate-disease relationships. These results indicate that  
549 climate change will very likely impact future Lyme disease incidence, but that effects will vary  
550 strongly between regions, and will depend on the degree of climate change.

551 Our prediction of climate change-induced increases in Lyme disease burden, particularly  
552 at higher latitudes, is consistent with prior studies predicting or observing increasing *I.*  
553 *scapularis* habitat suitability and range expansion under climate warming (McPherson et al.  
554 2017; Ogden et al. 2008, 2014b). Similar range expansions have also been predicted and  
555 observed for *Ixodes ricinus*, the European Lyme disease vector, under climate warming (Gray et  
556 al. 2009; Jaenson and Lindgren 2011; Lindgren et al. 2000; Porretta et al. 2013). Further, our  
557 finding that the predicted changes in incidence depend on the degree of future warming is also  
558 consistent with prior work. *I. scapularis* range expansion and population growth, and the  
559 proportion of Eastern Canadians at risk for Lyme disease, are predicted to be higher under  
560 upper climate change scenarios than under mitigation scenarios (Leighton et al. 2012;

561 McPherson et al. 2017). These results suggest that vector range expansions and future Lyme  
562 disease burdens depend in part on climate policy actions.

563 More generally, our results are consistent with expectations from vector thermal biology  
564 that suggest that warming temperatures generally increase transmission near the cold edge of a  
565 vector's range limit, but may decrease or have variable effects elsewhere (Lafferty and  
566 Mordecai 2016; Martens et al. 1995; Mordecai et al. 2019; Ogden and Lindsay 2016). For tick-  
567 borne disease, as for other vector-borne diseases, multiple temperature-sensitive traits combine  
568 to influence transmission, including survival, development rates, and host-seeking (questing)  
569 (Ogden et al. 2004; Ogden 2017; Randolph 2004; Randolph et al. 2002). Nonlinear effects of  
570 temperature on these traits typically leads to vector-borne disease transmission peaking at  
571 intermediate temperatures and declining to zero outside of lower and upper thermal limits  
572 (Mordecai et al. 2019). This suggests that climate warming would most strongly increase  
573 transmission near the lower thermal limits, such as in the Northeast and Midwest regions, as  
574 was observed here. This further suggests the effects of climate warming would differ in  
575 magnitude and direction depending on the extent of warming, as seen in the Midwest region  
576 where increases in incidence were predicted under moderate warming (RCP 4.5) and  
577 decreases in incidence were predicted with more severe warming (RCP 8.5). The theoretical  
578 expectations of nonlinear thermal responses therefore help to explain some of the context-  
579 dependent effects of temperature found empirically in this study

580 While our results match expectations from empirical and theoretical vector-borne  
581 disease biology, our Lyme disease forecasts should be interpreted with caution. The large  
582 prediction intervals around our point estimates indicate a wide range of potential disease  
583 outcomes under climate change. While significant increases were predicted for some regions,  
584 many other factors contribute to Lyme disease transmission including host movement and  
585 community composition, and human avoidance behaviors (Berry et al. 2018; Brinkerhoff et al.  
586 2011; Brownstein et al. 2005b; Larsen et al. 2014; MacDonald et al. 2019a; Ogden et al. 2008;  
587 Ostfeld 1997). Accordingly, we found that unobserved county-level heterogeneity, which would  
588 encompass these factors, was a predominant driver of incidence in each of our regional models.  
589 Further, while we examined the effects of two potential climate scenarios, uncertainty in these  
590 climate change projections was not incorporated into our predictive models and would add  
591 additional uncertainty in our Lyme disease predictions. Lastly, as our forecasting models  
592 extrapolate from climate and disease relationships observed in the previous 17 years, we  
593 assume that these relationships can be extended to climate conditions not yet experienced.  
594 That is, we assume the relationship between cumulative temperature, for example, and Lyme  
595 disease incidence in a given region will remain the same even as cumulative temperatures  
596 exceed prior values. This could generate inaccurate predictions for regions near current tick  
597 upper thermal limits such as the Southeast and Southwest as further warming and drought here  
598 may reduce tick survival and host-seeking abilities (Berger et al. 2014a; Randolph and Storey  
599 1999; Schulze et al. 2001; Vail and Smith 1998). Generating more accurate predictions for  
600 these regions would require experiments investigating effects of future temperatures on aspects  
601 of tick-borne disease transmission.

602 Despite these limitations, our results are consistent with a growing body of evidence  
603 linking increased Lyme disease risk with climate warming (Brownstein et al. 2005a; Burtis et al.  
604 2016; Clow et al. 2017b; Dumic and Severnini 2018; Kilpatrick et al. 2017; Leighton et al. 2012;  
605 Ogden et al. 2008, 2014b; Robinson et al. 2015; Subak 2003; Tuite et al. 2013). We  
606 demonstrate that climate is a key driver of Lyme disease incidence across the US,  
607 independently of other drivers of disease risk. We predict that future climate change could  
608 substantially increase Lyme disease burden, but the predicted effects are highly uncertain and  
609 regionally-specific. The largest changes in incidence are likely to be experienced in the  
610 Northeast and Midwest, where current climate-disease relationships are strongest and Lyme  
611 disease incidence has recently increased most substantially (Rosenberg 2018). Our predictions

612 provide an essential first step in determining broad patterns of Lyme disease risk under climate  
613 change, but ongoing surveillance efforts and mechanistic studies linking changes in vector  
614 ecology under climate change to human disease incidence should be conducted to refine these  
615 risk assessments.

616  
617

618 **Acknowledgements:**

619 All data used in this study are free, publicly available, and can be accessed here:  
620 <https://github.com/lcouper/LymeDiseaseClimateChange>. We are grateful to the CDC Division of  
621 Vector-Borne Diseases for supplying Lyme disease case data, Mohammad Alhamdan from  
622 NASA for supplying climate data. and to Iain Caldwell, Jamie Caldwell, Marissa Childs,  
623 Johannah Farner, Elizabeth Hadly, Morgan Kain, Devin Kirk, Giulio de Leo, Nicole Nova, and  
624 Marta Shocket for providing helpful feedback on the manuscript. LIC was funded by the  
625 Stanford Graduate Fellowship. EAM was funded by an NSF Ecology and Evolution of Infectious  
626 Diseases grant (DEB-1518681), the Terman Award, and the NIH NIGMS Maximizing  
627 Investigators' Research Award (1R35GM133439-01). AJM was funded by a UC Santa Barbara  
628 Faculty Research Grant.

629  
630

631 **References:**

- 632  
633  
634 Allen PG, Fildes R. 2001. Econometric Forecasting. In: **Principles of Forecasting** (J.S.  
635 Armstrong, ed). Vol. 30 of. Springer US:Boston, MA. 303–362.
- 636 Anwar H, Fischbacher CM, Leese GP, Lindsay RS, McKnight JA, Wild SH. 2011. Assessment  
637 of the under-reporting of diabetes in hospital admission data: a study from the Scottish  
638 Diabetes Research Network Epidemiology Group. **Diabet Med** 28:1514–1519;  
639 doi:10.1111/j.1464-5491.2011.03432.x.
- 640 Armstrong PM, Brunet LR, Spielman A, Telford III SR. 2001. Risk of Lyme disease:  
641 perceptions of residents of a Lone Star tick-infested community. **Bull World Health**  
642 **Organ** 79:916–925; doi:10.1590/S0042-96862001001000004.
- 643 Bascle G. 2008. Controlling for endogeneity with instrumental variables in strategic management  
644 research. **Strateg Organ** 6:285–327; doi:10.1177/1476127008094339.
- 645 Berger KA, Ginsberg HS, Dugas KD, Hamel LH, Mather TN. 2014a. Adverse moisture events  
646 predict seasonal abundance of Lyme disease vector ticks (*Ixodes scapularis*). **Parasit**  
647 **Vectors** 7:181; doi:10.1186/1756-3305-7-181.
- 648 Berger KA, Ginsberg HS, Gonzalez L, Mather TN. 2014b. Relative humidity and activity  
649 patterns of *Ixodes scapularis* (Acari: Ixodidae). **J Med Entomol** 51:769–776;  
650 doi:10.1603/ME13186.
- 651 Berry K, Bayham J, Meyer SR, Fenichel EP. 2018. The allocation of time and risk of Lyme: a  
652 case of ecosystem service income and substitution effects. **Environ Resour Econ**  
653 70:631–650; doi:10.1007/s10640-017-0142-7.
- 654 Bertrand MR, Wilson ML. 1996. Microclimate-dependent survival of unfed adult *Ixodes*  
655 *scapularis* (Acari: Ixodidae) in nature: life cycle and study design Implications. **J Med**  
656 **Entomol** 33:619–627; doi:10.1093/jmedent/33.4.619.
- 657 Bourne PA. 2009. Impact of poverty, not seeking medical care, unemployment, inflation, self-  
658 reported illness, and health insurance on mortality in Jamaica. **North Am J Med Sci** 1:  
659 99–109.
- 660 Brinkerhoff RJ, Folsom-O’Keefe CM, Tsao K, Diuk-Wasser MA. 2011. Do birds affect Lyme  
661 disease risk? Range expansion of the vector-borne pathogen *Borrelia burgdorferi*. **Front**  
662 **Ecol Environ** 9:103–110; doi:10.1890/090062.
- 663 Brownstein JS, Holford TR, Fish D. 2003. A climate-based model predicts the spatial  
664 distribution of the Lyme disease vector *Ixodes scapularis* in the United States. **Environ**  
665 **Health Perspect** 111:1152–1157; doi:10.1289/ehp.6052.
- 666 Brownstein JS, Holford TR, Fish D. 2005a. Effect of climate change on Lyme disease risk in  
667 North America. **EcoHealth** 2:38–46; doi:10.1007/s10393-004-0139-x.

- 668 Brownstein JS, Skelly DK, Holford TR, Fish D. 2005b. Forest fragmentation predicts local scale  
669 heterogeneity of Lyme disease risk. **Oecologia** 146:469–475; doi:10.1007/s00442-005-  
670 0251-9.
- 671 Burtis JC, Sullivan P, Levi T, Oggenfuss K, Fahey TJ, Ostfeld RS. 2016. The impact of  
672 temperature and precipitation on blacklegged tick activity and Lyme disease incidence in  
673 endemic and emerging regions. **Parasit Vectors** 9; doi:10.1186/s13071-016-1894-6.
- 674 Caldwell J, Heron S, Eakin C, Donahue M. 2016. Satellite SST-based coral disease outbreak  
675 predictions for the Hawaiian archipelago. **Remote Sens** 8:93; doi:10.3390/rs8020093.
- 676 Cameron AC, Miller DL. 2015. A practitioner’s guide to cluster-robust inference. **J Hum**  
677 **Resour** 50:317–372; doi:10.3368/jhr.50.2.317.
- 678 Carroll JF, Kramer M. 2003. Winter activity of *Ixodes scapularis* (Acari: Ixodidae) and the  
679 operation of deer-targeted tick control devices in Maryland. **J Med Entomol** 40:238–  
680 244; doi:10.1603/0022-2585-40.2.238.
- 681 Ciesielski CA, Markowitz LE, Horsley R, Hightower AW, Russell H, Broome CV. 1988. The  
682 geographic distribution of Lyme disease in the United States. **Ann N Y Acad Sci**  
683 539:283–288; doi:10.1111/j.1749-6632.1988.tb31862.x.
- 684 Clark DD. 1995. Lower temperature limits for activity of several Ixodid ticks (Acari: Ixodidae):  
685 effects of body size and rate of temperature change. **J Med Entomol** 32:449–452;  
686 doi:10.1093/jmedent/32.4.449.
- 687 Clark JS, Carpenter SR, Barber M, Collins S, Dobson A, Foley JA, et al. 2001. Ecological  
688 forecasts: an emerging imperative. **Science** 293:657–660;  
689 doi:10.1126/science.293.5530.657.
- 690 Clow KM, Leighton PA, Ogden NH, Lindsay LR, Michel P, Pearl DL, et al. 2017a. Northward  
691 range expansion of *Ixodes scapularis* evident over a short timescale in Ontario, Canada.  
692 **PLoS ONE** 12:e0189393; doi:10.1371/journal.pone.0189393.
- 693 Clow KM, Ogden NH, Lindsay LR, Michel P, Pearl DL, Jardine CM. 2017b. The influence of  
694 abiotic and biotic factors on the invasion of *Ixodes scapularis* in Ontario, Canada. **Ticks**  
695 **Tick-Borne Dis** 8:554–563; doi:10.1016/j.ttbdis.2017.03.003.
- 696 Connally NP, Durante AJ, Yousey-Hindes KM, Meek JI, Nelson RS, Heimer R. 2009.  
697 Peridomestic Lyme disease prevention: results of a population-based case–control study.  
698 **Am J Prev Med** 37:201–206; doi:10.1016/j.amepre.2009.04.026.
- 699 Dennis DT, Nekomoto TS, Victor JC, Paul WS, Piesman J. 1998. Reported distribution of *Ixodes*  
700 *scapularis* and *Ixodes pacificus* (Acari: Ixodidae) in the United States. **J Med Entomol**  
701 35:629–638; doi:10.1093/jmedent/35.5.629.
- 702 Dister SW, Fish D. 1997. Landscape characterization of peridomestic risk for Lyme disease  
703 using satellite imagery. **Am J Trop Med Hyg** 6.

- 704 Doshi AM, Van Den Eeden SK, Morrill MY, Schembri M, Thom DH, Brown JS. 2010. Women  
705 with diabetes: understanding urinary incontinence and help seeking behavior. **J Urol**  
706 184:1402–1407; doi:10.1016/j.juro.2010.06.014.
- 707 Duffy DC, Campbell SR. 1994. Ambient air temperature as a predictor of activity of adult *Ixodes*  
708 *scapularis* (Acari: Ixodidae). **J Med Entomol** 31:178–180;  
709 doi:10.1093/jmedent/31.1.178.
- 710 Dumic I, Severnini E. 2018. “Ticking bomb”: the impact of climate change on the incidence of  
711 Lyme disease. **Can J Infect Dis Med Microbiol**; doi:10.1155/2018/5719081.
- 712 Eisen RJ, Eisen L, Ogden NH, Beard CB. 2016a. Linkages of weather and climate with *Ixodes*  
713 *scapularis* and *Ixodes pacificus* (Acari: Ixodidae), enzootic transmission of *Borrelia*  
714 *burgdorferi*, and Lyme disease in North America. **J Med Entomol** 53:250–261;  
715 doi:10.1093/jme/tjv199.
- 716 Eldin C, Parola P. 2018. Update on tick-borne bacterial diseases in travelers. **Curr Infect Dis**  
717 **Rep** 20:17; doi:10.1007/s11908-018-0624-y.
- 718 Estrada-Peña A. 2002. Increasing habitat suitability in the United States for the tick that  
719 transmits Lyme disease: a remote sensing approach. **Environ Health Perspect** 110:635–  
720 640; doi:10.1289/ehp.110-1240908.
- 721 Falco RC, Fish D. 1988. Prevalence of *Ixodes dammini* near the homes of Lyme disease patients  
722 in Westchester county, New York. **Am J Epidemiol** 127:826–830;  
723 doi:10.1093/oxfordjournals.aje.a114865.
- 724 Frank DH, Fish D, Moy FH. 1998. Landscape features associated with Lyme disease risk in a  
725 suburban residential environment. **Landsc Ecol** 13:27–36;  
726 doi:10.1023/A:1007965600166.
- 727 Githeko AK, Lindsay SW, Confalonieri UE, Patz JA. 2000. Climate change and vector-borne  
728 diseases: a regional analysis. **Bull World Health Organ** 12.
- 729 Glass GE, Schwartz BS, Morgan JM, Johnson DT, Noy PM, Israel E. 1995. Environmental risk  
730 factors for Lyme disease identified with geographic information systems. **Am J Public**  
731 **Health** 85:944–948; doi:10.2105/AJPH.85.7.944.
- 732 González C, Wang O, Strutz SE, González-Salazar C, Sánchez-Cordero V, Sarkar S. 2010.  
733 Climate change and risk of Leishmaniasis in North America: predictions from ecological  
734 niche models of vector and reservoir species. A.P. Galvani, ed **PLoS Negl Trop Dis**  
735 4:e585; doi:10.1371/journal.pntd.0000585.
- 736 Gray JS, Dautel H, Estrada-Peña A, Kahl O, Lindgren E. 2009. Effects of climate change on  
737 ticks and tick-borne diseases in Europe. **Interdiscip Perspect Infect Dis** 2009:1–12;  
738 doi:10.1155/2009/593232.



- 739 Hair JF, Black WC, Babin B, Anderson R, eds. 2014. **Multivariate data analysis**. 7th ed.  
740 Pearson.
- 741 Harris MI, Eastman RC. 2000. Early detection of undiagnosed diabetes mellitus: a US  
742 perspective. **Diabetes Metab Res Rev** 16:230–236; doi:10.1002/1520-  
743 7560(2000)9999:9999<::AID-DMRR122>3.0.CO;2-W.
- 744 Hayhoe K, Edmonds J, Kopp RE, LeGrande AN, Sanderson BM, Wehner MF, et al. 2017.  
745 Climate models, scenarios, and projections. In: **Climate Science Special Report: Fourth**  
746 **National Climate Assessment, Volume I** (D.J. Wuebbles, D.W. Fahey, K.A. Hibbard,  
747 D.J. Dokken, B.C. Stewart, and T.K. Maycock, eds). U.S. Global Change Research  
748 Program Washington, DC, USA. 133–160.
- 749 Hii YL, Rocklöv J, Ng N, Tang CS, Pang FY, Sauerborn R. 2009. Climate variability and  
750 increase in intensity and magnitude of dengue incidence in Singapore. **Glob Health**  
751 **Action** 2:2036; doi:10.3402/gha.v2i0.2036.
- 752 Hijmans RJ. 2012. Cross-validation of species distribution models: removing spatial sorting bias  
753 and calibration with a null model. **Ecology** 93:679–688; doi:10.1890/11-0826.1.
- 754 Humphrey PT, Caporale DA, Brisson D. 2010. Uncoordinated phylogeography of *Borrelia*  
755 *burgdorferi* and its tick vector, *Ixodes scapularis*. **Evolution** 64:2653–2663;  
756 doi:10.1111/j.1558-5646.2010.01001.x.
- 757 Jackson LE, Hilborn ED, Thomas JC. 2006. Towards landscape design guidelines for reducing  
758 Lyme disease risk. **Int J Epidemiol** 35:315–322; doi:10.1093/ije/dyi284.
- 759 Jaenson TGT, Lindgren E. 2011. The range of *Ixodes ricinus* and the risk of contracting Lyme  
760 borreliosis will increase northwards when the vegetation period becomes longer. **Ticks**  
761 **Tick-Borne Dis** 2:44–49; doi:10.1016/j.ttbdis.2010.10.006.
- 762 Jones CJ, Kitron UD. 2000. Populations of *Ixodes scapularis* (Acari: Ixodidae) are modulated by  
763 drought at a Lyme disease focus in Illinois. **J Med Entomol** 37:408–415;  
764 doi:10.1093/jmedent/37.3.408.
- 765 Judge G, Griffiths W, Carter R, Lutkepohl H, Lee T. 1985. **The Theory and Practice of**  
766 **Econometrics**. Wiley:New York.
- 767 Kain DE, Sperling FAH, Daly HV, Lane RS. 1999. Mitochondrial DNA sequence variation in  
768 *Ixodes pacificus* (Acari: Ixodidae). **Heredity** 83:378–386; doi:10.1046/j.1365-  
769 2540.1999.00611.x.
- 770 Kain DE, Sperling FAH, Lane RS. 1997. Population genetic structure of *Ixodes pacificus* (Acari:  
771 Ixodidae) using allozymes. **J Med Entomol** 34:441–450; doi:10.1093/jmedent/34.4.441.
- 772 Killilea ME, Swei A, Lane RS, Briggs CJ, Ostfeld RS. 2008. Spatial dynamics of Lyme disease:  
773 a review. **EcoHealth** 5:167–195; doi:10.1007/s10393-008-0171-3.

- 774 Kilpatrick AM, Dobson ADM, Levi T, Salkeld DJ, Swei A, Ginsberg HS, et al. 2017. Lyme  
775 disease ecology in a changing world: consensus, uncertainty and critical gaps for  
776 improving control. **Philos Trans R Soc B Biol Sci** 372:20160117;  
777 doi:10.1098/rstb.2016.0117.
- 778 Kilpatrick AM, Randolph SE. 2012. Drivers, dynamics, and control of emerging vector-borne  
779 zoonotic diseases. **The Lancet** 380:1946–1955; doi:10.1016/S0140-6736(12)61151-9.
- 780 Kirby JB, Kaneda T. 2005. Neighborhood socioeconomic disadvantage and access to health care.  
781 **J Health Soc Behav** 46:15–31; doi:10.1177/002214650504600103.
- 782 Knülle W, Rudolph D. 1982. Humidity relationships and water balance of ticks. In: **Physiology**  
783 **of Ticks**. Elsevier. 43–70.
- 784 Kurtenbach K, Hanincová K, Tsao JI, Margos G, Fish D, Ogden NH. 2006. Fundamental  
785 processes in the evolutionary ecology of Lyme borreliosis. **Nat Rev Microbiol** 4:660–  
786 669; doi:10.1038/nrmicro1475.
- 787 Lafferty KD, Mordecai EA. 2016. The rise and fall of infectious disease in a warmer world.  
788 **F1000Research** 5; doi:10.12688/f1000research.8766.1.
- 789 Lane RS, Kleinjan JE, Schoeler GB. 1995. Diel activity of nymphal *Dermacentor occidentalis*  
790 and *Ixodes pacificus* (Acari: Ixodidae) in relation to meteorological factors and host  
791 activity periods. **J Med Entomol** 32:290–299; doi:10.1093/jmedent/32.3.290.
- 792 Larsen AE, MacDonald AJ, Plantinga AJ. 2014. Lyme disease risk influences human settlement  
793 in the wildland–urban interface: evidence from a longitudinal analysis of counties in the  
794 northeastern United States. **Am J Trop Med Hyg** 91:747–755; doi:10.4269/ajtmh.14-  
795 0181.
- 796 Larsen AE, Meng K, Kendall BE. 2019. Causal analysis in control-impact ecological studies  
797 with observational data. **Methods Ecol Evol**; doi:10.1111/2041-210X.13190.
- 798 Leighton PA, Koffi JK, Pelcat Y, Lindsay LR, Ogden NH. 2012. Predicting the speed of tick  
799 invasion: an empirical model of range expansion for the Lyme disease vector *Ixodes*  
800 *scapularis* in Canada. **J Appl Ecol** 49:457–464; doi:10.1111/j.1365-2664.2012.02112.x.
- 801 Lindgren E, Tälleklint L, Polfeldt T. 2000. Impact of climatic change on the northern latitude  
802 limit and population density of the disease-transmitting European tick *Ixodes ricinus*.  
803 **Environ Health Perspect** 108:119–123; doi:10.1289/ehp.00108119.
- 804 Lindsay LR, Barker IK, Surgeoner GA, McEwen SA, Gillespie TJ, Robinson JT. 1995. Survival  
805 and development of *Ixodes scapularis* (Acari: Ixodidae) under various climatic conditions  
806 in Ontario, Canada. **J Med Entomol** 32:143–152; doi:10.1093/jmedent/32.2.143.
- 807 Loevinsohn ME. 1994. Climatic warming and increased malaria incidence in Rwanda. **The**  
808 **Lancet** 343:714–718; doi:10.1016/S0140-6736(94)91586-5.

- 809 MacDonald AJ, Larsen AE, Plantinga AJ. 2019a. Missing the people for the trees: identifying  
810 coupled natural–human system feedbacks driving the ecology of Lyme disease. **J Appl**  
811 **Ecol** 56:354–364; doi:10.1111/1365-2664.13289.
- 812 MacDonald AJ, O’Neill C, Yoshimizu MH, Padgett KA, Larsen AE. 2019b. Tracking seasonal  
813 activity of the western blacklegged tick across California. **J Appl Ecol** 56:2562–2573;  
814 doi:10.1111/1365-2664.13490.
- 815 Martens W, Jetten T, Rotmans J, Niessen L. 1995. Climate change and vector-borne diseases: a  
816 global modelling perspective. **Glob Environ Change** 5:195–209; doi:10.1016/0959-  
817 3780(95)00051-O.
- 818 Mattingly PF. 1969. **The biology of mosquito-borne disease**. London: George Allen and Unwin  
819 Ltd.
- 820 Maupin GO, Fish D, Zultowsky J, Campos EG, Piesman J. 1991. Landscape ecology of Lyme  
821 disease in a residential area of Westchester county, New York. **Am J Epidemiol**  
822 133:1105–1113; doi:10.1093/oxfordjournals.aje.a115823.
- 823 McCabe GJ, Bunnell JE. 2004. Precipitation and the occurrence of Lyme disease in the  
824 northeastern United States. **Vector-Borne Zoonotic Dis** 4:143–148;  
825 doi:10.1089/1530366041210765.
- 826 McEnroe WD. 1977. The restriction of the species range of *Ixodes scapularis*, Say, in  
827 Massachusetts by fall and winter temperature. **Acarologia**.
- 828 McPherson M, García-García A, Cuesta-Valero FJ, Beltrami H, Hansen-Ketchum P,  
829 MacDougall D, et al. 2017. Expansion of the Lyme disease vector *Ixodes scapularis* in  
830 Canada inferred from CMIP5 climate projections. **Environ Health Perspect**  
831 125:057008; doi:10.1289/EHP57.
- 832 Mills JN, Gage KL, Khan AS. 2010. Potential influence of climate change on vector-borne and  
833 zoonotic diseases: a review and proposed research plan. **Environ Health Perspect**  
834 118:1507–1514; doi:10.1289/ehp.0901389.
- 835 Mordecai EA, Caldwell JM, Grossman MK, Lippi CA, Johnson LR, Neira M, et al. 2019.  
836 Thermal biology of mosquito-borne disease. **Ecol Lett** 22:1690–1708;  
837 doi:10.1111/ele.13335.
- 838 Morshed MG, Scott JD, Fernando K, Geddes G, McNabb A, Mak S, et al. 2006. Distribution and  
839 characterization of *Borrelia burgdorferi* isolates from *Ixodes scapularis* and presence in  
840 mammalian hosts in Ontario, Canada. **J Med Entomol** 43:762–773;  
841 doi:10.1093/jmedent/43.4.762.
- 842 Nakicenovic N, Alcamo J, Grubler A, Riahi K, Roehrl RA, Rogner H-H, et al. 2000. **Special**  
843 **Report on Emissions Scenarios (SRES), A Special Report of Working Group III of**  
844 **the Intergovernmental Panel on Climate Change**. Cambridge University  
845 Press:Cambridge.

- 846 Needham GR, Teel PD. 1991. Off-host physiological ecology of Ixodid ticks. **Annu Rev**  
847 **Entomol** 36:659–681; doi:10.1146/annurev.en.36.010191.003303.
- 848 Nieto NC, Holmes EA, Foley JE. 2010. Survival rates of immature *Ixodes pacificus* (Acari:  
849 Ixodidae) ticks estimated using field-placed enclosures. **J Vector Ecol** 35:43–49;  
850 doi:10.1111/j.1948-7134.2010.00056.x.
- 851 Ogden N, Koffi J, Pelcat Y, Lindsay L. 2014a. Environmental risk from Lyme disease in central  
852 and eastern Canada: a summary of recent surveillance information. **Can Commun Dis**  
853 **Rep** 40: 74–82.
- 854 Ogden NH. 2017. Climate change and vector-borne diseases of public health significance.  
855 **FEMS Microbiol Lett** 364; doi:10.1093/femsle/fnx186.
- 856 Ogden NH, Bigras-Poulin M, O’Callaghan CJ, Barker IK, Lindsay LR, Maarouf A, et al. 2005.  
857 A dynamic population model to investigate effects of climate on geographic range and  
858 seasonality of the tick *Ixodes scapularis*. **Int J Parasitol** 35:375–389;  
859 doi:10.1016/j.ijpara.2004.12.013.
- 860 Ogden NH, Lindsay LR. 2016. Effects of climate and climate change on vectors and vector-  
861 borne diseases: ticks are different. **Trends Parasitol** 32:646–656;  
862 doi:10.1016/j.pt.2016.04.015.
- 863 Ogden NH, Lindsay LR, Beauchamp G, Charron D, Maarouf A, O’Callaghan CJ, et al. 2004.  
864 Investigation of relationships between temperature and developmental rates of tick *Ixodes*  
865 *scapularis* (Acari: Ixodidae) in the laboratory and field. **J Med Entomol** 41:622–633;  
866 doi:10.1603/0022-2585-41.4.622.
- 867 Ogden NH, Radojevic’ M, Wu X, Duvvuri VR, Leighton PA, Wu J. 2014b. Estimated effects of  
868 projected climate change on the basic reproductive number of the Lyme disease vector  
869 *Ixodes scapularis*. **Environ Health Perspect** 122:631–638; doi:10.1289/ehp.1307799.
- 870 Ogden NH, St-Onge L, Barker IK, Brazeau S, Bigras-Poulin M, Charron DF, et al. 2008. Risk  
871 maps for range expansion of the Lyme disease vector, *Ixodes scapularis*, in Canada now  
872 and with climate change. **Int J Health Geogr** 7:24; doi:10.1186/1476-072X-7-24.
- 873 Ostfeld R, Brunner J. 2015. Climate change and *Ixodes* tick-borne diseases of humans. **Philos**  
874 **Trans R Soc B Biol Sci** 370:20140051; doi:10.1098/rstb.2014.0051.
- 875 Ostfeld RS. 1997. The ecology of Lyme-disease risk: complex interactions between seemingly  
876 unconnected phenomena determine risk of exposure to this expanding disease. **Am Sci**  
877 85: 338–346.
- 878 Parola P, Paddock CD. 2018. Travel and tick-borne diseases: Lyme disease and beyond. **Travel**  
879 **Med Infect Dis** 26:1–2; doi:10.1016/j.tmaid.2018.09.010.

- 880 Porretta D, Mastrantonio V, Amendolia S, Gaiarsa S, Epis S, Genchi C, et al. 2013. Effects of  
881 global changes on the climatic niche of the tick *Ixodes ricinus* inferred by species  
882 distribution modelling. **Parasit Vectors** 6:271; doi:10.1186/1756-3305-6-271.
- 883 Purse BV, Mellor PS, Rogers DJ, Samuel AR, Mertens PPC, Baylis M. 2005. Climate change  
884 and the recent emergence of bluetongue in Europe. **Nat Rev Microbiol** 3:171–181;  
885 doi:10.1038/nrmicro1090.
- 886 Raghavan RK, Almes K, Goodin DG, Harrington JA, Stackhouse PW. 2014. Spatially  
887 heterogeneous land cover/land use and climatic risk factors of tick-borne feline  
888 cytauxzoonosis. **Vector-Borne Zoonotic Dis** 14:486–495; doi:10.1089/vbz.2013.1496.
- 889 Rand PW, Holman MS, Lubelczyk C, Lacombe EH, DeGaetano AT, Smith RP. 2004. Thermal  
890 accumulation and the early development of *Ixodes scapularis*. **J Vector Ecol** 13.
- 891 Randolph SE. 2004. Tick ecology: processes and patterns behind the epidemiological risk posed  
892 by ixodid ticks as vectors. **Parasitology** 129:S37–S65;  
893 doi:10.1017/S0031182004004925.
- 894 Randolph SE. 2010. To what extent has climate change contributed to the recent epidemiology of  
895 tick-borne diseases? **Vet Parasitol** 167:92–94; doi:10.1016/j.vetpar.2009.09.011.
- 896 Randolph SE, Green RM, Hoodless AN, Peacey MF. 2002. An empirical quantitative framework  
897 for the seasonal population dynamics of the tick *Ixodes ricinus*. **Int J Parasitol** 32:979–  
898 989; doi:10.1016/S0020-7519(02)00030-9.
- 899 Randolph SE, Storey K. 1999. Impact of microclimate on immature tick-rodent host interactions  
900 (Acari: Ixodidae): implications for parasite transmission. **J Med Entomol** 36:741–748;  
901 doi:10.1093/jmedent/36.6.741.
- 902 Ricketts TH, Dinerstein E, Olson DM, Eichbaum W, Loucks CJ, Kavanaugh K, et al. 1999.  
903 **Terrestrial Ecoregions of North America: A Conservation Assessment**. Island Press.
- 904 Rizzoli A, Hauffe H, Carpi G, Vourc'h G, Neteler M, Rosa R. 2011. Lyme borreliosis in Europe.  
905 **Euro Surveill** 16.
- 906 Robinson SJ, Neitzel DF, Moen RA, Craft ME, Hamilton KE, Johnson LB, et al. 2015. Disease  
907 risk in a dynamic environment: the spread of tick-borne pathogens in Minnesota, USA.  
908 **EcoHealth** 12:152–163; doi:10.1007/s10393-014-0979-y.
- 909 Rodgers SE, Zolnik CP, Mather TN. 2007. Duration of exposure to suboptimal atmospheric  
910 moisture affects nymphal blacklegged tick survival. **J Med Entomol** 44:372–375;  
911 doi:10.1093/jmedent/44.2.372.
- 912 Rogelj J, Meinshausen M, Knutti R. 2012. Global warming under old and new scenarios using  
913 IPCC climate sensitivity range estimates. **Nat Clim Change** 2:248–253;  
914 doi:10.1038/nclimate1385.

- 915 Rogers DJ, Randolph SE. 2006. Climate change and vector-borne diseases. In: **Advances in**  
916 **Parasitology**. Vol. 62 of. Elsevier. 345–381.
- 917 Roiz D, Neteler M, Castellani C, Arnoldi D, Rizzoli A. 2011. Climatic factors driving invasion  
918 of the tiger mosquito (*Aedes albopictus*) into new areas of Trentino, northern Italy. M.  
919 Baylis, ed **PLoS ONE** 6:e14800; doi:10.1371/journal.pone.0014800.
- 920 Rosenberg R, Lindsey NP, Fischer M, Gregory CJ, Hinckley AF, Mead PS, et al. 2018. Vital  
921 signs: trends in reported vectorborne disease cases — United States and territories, 2004–  
922 2016. **Morb Mortal Wkly Rep** 67:496–501; doi:10.15585/mmwr.mm6717e1.
- 923 Salkeld DJ, Lane RS. 2010. Community ecology and disease risk: lizards, squirrels, and the  
924 Lyme disease spirochete in California, USA. **Ecology** 91:293–298; doi:10.1890/08-  
925 2106.1.
- 926 Schaubert EM, Ostfeld RS, Jr ASE. 2005. What is the best predictor of annual Lyme disease  
927 incidence: weather, mice, or acorns? **Ecol Appl** 15:575–586; doi:10.1890/03-5370.
- 928 Schmidt GA, Kelley M, Nazarenko L, Ruedy R, Russell GL, Aleinov I, et al. 2014.  
929 Configuration and assessment of the GISS ModelE2 contributions to the CMIP5 archive.  
930 **J Adv Model Earth Syst** 6:141–184; doi:10.1002/2013MS000265.
- 931 Schulze TL, Jordan RA, Hung RW. 2001. Effects of selected meteorological factors on diurnal  
932 questing of *Ixodes scapularis* and *Amblyomma americanum* (Acari: Ixodidae). **J Med**  
933 **Entomol** 38:318–324; doi:10.1603/0022-2585-38.2.318.
- 934 Scott J, Scott C. 2018. Lyme disease propelled by *Borrelia burgdorferi*-infected blacklegged  
935 ticks, wild birds and public awareness — not climate change. **J Vet Sci Med** 6:01–08;  
936 doi:10.13188/2325-4645.1000035.
- 937 Smith JR, Letten AD, Ke P-J, Anderson CB, Hendershot JN, Dhami MK, et al. 2018. A global  
938 test of ecoregions. **Nat Ecol Evol** 2:1889–1896; doi:10.1038/s41559-018-0709-x.
- 939 Sohl TL, Saylor KL, Bouchard MA, Reker RR, Friesz AM, Bennett SL, et al. 2014. Spatially  
940 explicit modeling of 1992–2100 land cover and forest stand age for the conterminous  
941 United States. **Ecol Appl** 24:1015–1036; doi:10.1890/13-1245.1.
- 942 Sonenshine DE, Roe RM. 2013. **Biology of Ticks**. Oxford University Press, New York.
- 943 Stafford KC. 1994. Survival of immature *Ixodes scapularis* (Acari: Ixodidae) at different relative  
944 humidities. **J Med Entomol** 31:310–314; doi:10.1093/jmedent/31.2.310.
- 945 Subak S. 2003. Effects of climate on variability in Lyme disease incidence in the northeastern  
946 United States. **Am J Epidemiol** 157:531–538; doi:10.1093/aje/kwg014.
- 947 Tabachnick WJ. 2010. Challenges in predicting climate and environmental effects on vector-  
948 borne disease epistystems in a changing world. **J Exp Biol** 213:946–954;  
949 doi:10.1242/jeb.037564.

- 950 Taylor KE, Stouffer RJ, Meehl GA. 2012. An overview of CMIP5 and the experiment design.  
951 **Bull Am Meteorol Soc** 93:485–498; doi:10.1175/BAMS-D-11-00094.1.
- 952 Tuite AR, Greer AL, Fisman DN. 2013. Effect of latitude on the rate of change in incidence of  
953 Lyme disease in the United States. **CMAJ Open** 1:E43–E47;  
954 doi:10.9778/cmajo.20120002.
- 955 U.S. Census Bureau. 2000. Annual projections of the total resident population as of July 1:  
956 middle, lowest, highest, and zero international migration series, 1999 to 2100. **US**  
957 **Census Bur.**
- 958 Vail SG, Smith G. 1998. Air temperature and relative humidity effects on behavioral activity of  
959 blacklegged tick (Acari: Ixodidae) nymphs in New Jersey. **J Med Entomol** 35:1025–  
960 1028; doi:10.1093/jmedent/35.6.1025.
- 961 van Vuuren DP, Edmonds J, Kainuma M, Riahi K, Thomson A, Hibbard K, et al. 2011. The  
962 representative concentration pathways: an overview. **Clim Change** 109:5–31;  
963 doi:10.1007/s10584-011-0148-z.
- 964 Vandyk JK, Bartholomew DM, Rowley WA, Platt KB. 1996. Survival of *Ixodes scapularis*  
965 (Acari: Ixodidae) exposed to cold. **J Med Entomol** 33:6–10; doi:10.1093/jmedent/33.1.6.
- 966 Wenger SJ, Isaak DJ, Dunham JB, Fausch KD, Luce CH, Neville HM, et al. 2011. Role of  
967 climate and invasive species in structuring trout distributions in the interior Columbia  
968 River Basin, USA. **Can J Fish Aquat Sci** 68:988–1008; doi:10.1139/f2011-034.
- 969 Wenger SJ, Olden JD. 2012. Assessing transferability of ecological models: an underappreciated  
970 aspect of statistical validation. **Methods Ecol Evol** 3:260–267; doi:10.1111/j.2041-  
971 210X.2011.00170.x.
- 972 Wilking H, Stark K. 2014. Trends in surveillance data of human Lyme borreliosis from six  
973 federal states in eastern Germany, 2009–2012. **Ticks Tick-Borne Dis** 5:219–224;  
974 doi:10.1016/j.ttbdis.2013.10.010.
- 975 Wimberly MC, Yabsley MJ, Baer AD, Dugan VG, Davidson WR. 2008. Spatial heterogeneity of  
976 climate and land-cover constraints on distributions of tick-borne pathogens. **Glob Ecol**  
977 **Biogeogr** 17:189–202; doi:10.1111/j.1466-8238.2007.00353.x.
- 978 Wolff JO. 1996. Coexistence of white-footed mice and deer mice may be mediated by  
979 fluctuating environmental conditions. **Oecologia** 108:529–533;  
980 doi:10.1007/BF00333730.
- 981 World Health Organization. 2014. A global brief on vector-borne diseases. **World Health**  
982 **Organ Tech Rep.**
- 983 Yamashita T, Yamashita K, Kamimura R. 2007. A stepwise AIC method for variable selection in  
984 Linear Regression. **Commun Stat - Theory Methods** 36:2395–2403;  
985 doi:10.1080/03610920701215639.

- 986 Yang L, Jin S, Danielson P, Homer C, Gass L, Bender SM, et al. 2018. A new generation of the  
987 United States National Land Cover Database: requirements, research priorities, design,  
988 and implementation strategies. **ISPRS J Photogramm Remote Sens** 146:108–123;  
989 doi:10.1016/j.isprsjprs.2018.09.006.
- 990 Zhang Z. 2016. Variable selection with stepwise and best subset approaches. **Ann Transl Med**  
991 4:136–136; doi:10.21037/atm.2016.03.35.
- 992



993 **Tables**

994

995 **Table 1.** Climate variables tested for models of disease incidence by region, along with  
996 descriptions and justification of their relevance to disease transmission.  
997

| Climate Variable               | Description                                                                                                                                                                                                                                                                 | Biological Relevance                                                                                                                                                                                                                                                                                                                                                                                            |
|--------------------------------|-----------------------------------------------------------------------------------------------------------------------------------------------------------------------------------------------------------------------------------------------------------------------------|-----------------------------------------------------------------------------------------------------------------------------------------------------------------------------------------------------------------------------------------------------------------------------------------------------------------------------------------------------------------------------------------------------------------|
| Lagged winter temperature      | Average monthly temperatures for Dec - Feb 1.5 years prior. Identified by Subak, 2003 as significantly positively correlated with Lyme disease incidence in highly endemic areas.                                                                                           | Colder winter temperatures are associated with reduced host-seeking abilities of the adult tick (Duffy and Campbell 1994; Clark 1995; Carroll and Kramer 2003) and reduced abundance of the white-footed mouse, a highly competent reservoir host (Wolff 1996).                                                                                                                                                 |
| Spring precipitation           | Average precipitation in May and June. Identified by McCabe and Bunnell, 2004 as significantly positively correlated with Lyme disease incidence in highly endemic areas.                                                                                                   | Greater precipitation during the late spring and early summer increases the moisture of the leaf litter, providing conditions which promote the survival and questing activity of the nymphal life stage (Knülle and Rudolph 1982; Berger et al. 2014).                                                                                                                                                         |
| Hot, dry days                  | The number of days with temperature > 25°C and precipitation = 0 during May – July (or May – June for counties with <i>Ixodes pacificus</i> ). Identified by Burtis et al. 2016 as significantly negatively correlated with Lyme disease incidence in highly endemic areas. | Hot, dry conditions are associated with decreased questing activity and questing height of ticks (Randolph and Storey 1999; Schulze et al. 2001), reducing the likelihood of attachment to humans (Arsnoe et al. 2015). The May through July, and May through June, time periods capture the peak nymphal questing periods for <i>I. scapularis</i> and <i>I. pacificus</i> , respectively (Eisen et al. 2016). |
| Cumulative average temperature | The sum of average daily temperatures (°F) over the entire year                                                                                                                                                                                                             | Cumulative temperature appears to control most developmental stages of <i>I. scapularis</i> (Lindsay et al. 1995; Rand et al. 2004). Lower cumulative temperature is associated with longer development periods and/or higher tick mortality (McEnroe 1977; Estrada-Peña 2002; Brownstein et al. 2003; Ogden et al. 2004; Leighton et al. 2012).                                                                |
| Cumulative daily precipitation | The sum of total daily precipitation (mm) over the entire year                                                                                                                                                                                                              | Greater precipitation increases the moisture of the leaf litter, providing conditions which promote tick survival and questing activity (Knülle and Rudolph 1982; Jones and Kitron 2000; Berger et al. 2014a).                                                                                                                                                                                                  |
| Temperature variance           | The variance in average daily temperatures (°F) over the entire year                                                                                                                                                                                                        | Frequent temperature variation can decrease tick survival, even beyond that of constant cold exposure, due to energetic costs associated with adapting to changing temperatures (Gigon 1985; Herrmann and Gern 2010); however, effects will vary based on the average temperature of the region.                                                                                                                |

---

Precipitation  
variance

The variance in total daily  
precipitation (mm) over the entire  
year

Both drought and heavy rainfall are associated with decreased tick questing activity and survival (Randolph 1997; Jones and Kitron 2000; Perret et al. 2004). Variation in precipitation, as opposed to consistent rainfall supplying favorable high relative humidity conditions, may thus be detrimental for tick survival, but will depend on the average precipitation of the region and the magnitude of variation.

---

998  
999  
1000

1001 **Table 2.** Effect of climate and non-climate variables on Lyme disease incidence by region. Only  
 1002 variables included in the best model, as determined by variable selection, are shown. The  
 1003 scaled coefficient estimates (Coef.) shown here reflect the standard deviation change in Lyme  
 1004 disease incidence for a one standard deviation change in the climate variable. The coefficients  
 1005 are scaled so that the effects of different variables are directly comparable. The standard errors  
 1006 (SE) shown are clustered by the agricultural statistics district (see Methods: Statistical  
 1007 approach). Statistically significant ( $p < 0.05$ ) coefficients are denoted with \*.  
 1008

|                                              | Northeast |       | Midwest |       | Pacific |       | Pacific Southwest |       | Southwest |       | Southeast |       |
|----------------------------------------------|-----------|-------|---------|-------|---------|-------|-------------------|-------|-----------|-------|-----------|-------|
| Variable                                     | Coef.     | SE    | Coef.   | SE    | Coef.   | SE    | Coef.             | SE    | Coef.     | SE    | Coef.     | SE    |
| <b>Climate variables</b>                     |           |       |         |       |         |       |                   |       |           |       |           |       |
| Avg. Winter Temp.                            | 0.117     | 0.145 | 0.398*  | 0.168 |         |       | 0.872             | 0.653 |           |       |           |       |
| Avg. Spring Precip.                          | -0.095    | 0.053 | -0.045  | 0.042 | -0.319  | 0.178 |                   |       | -0.915    | 0.644 |           |       |
| Hot, Dry Days                                | -0.141*   | 0.071 | -0.213* | 0.079 |         |       |                   |       | 0.259     | 0.181 |           |       |
| Cumulative Temp                              | 0.503     | 0.364 |         |       |         |       |                   |       |           |       |           |       |
| Cumulative Precip.                           |           |       | -0.070  | 0.076 |         |       |                   |       | 2.634     | 1.734 | -0.054*   | 0.024 |
| Temp. Variance                               | 0.271     | 0.202 | -0.134  | 0.153 |         |       |                   |       |           |       |           |       |
| Precip. Variance                             |           |       |         |       |         |       |                   |       | -0.750    | 0.469 |           |       |
| <b>Non-climate variables</b>                 |           |       |         |       |         |       |                   |       |           |       |           |       |
| Lag 'Ticks' Search                           | 0.211*    | 0.053 | 0.008   | 0.019 | 0.026   | 0.025 | 0.028             | 0.083 | 0.11      | 0.092 | -0.01     | 0.017 |
| Poverty                                      |           |       |         |       |         |       |                   |       |           |       |           |       |
| Percent Insured                              |           |       |         |       |         |       |                   |       |           |       |           |       |
| Diabetes                                     | -0.025    | 0.065 | -0.026  | 0.032 | 0.052   | 0.132 | 0.022             | 0.094 | 0.062     | 0.064 | -0.041    | 0.026 |
| Forest Cover                                 |           |       | -3.323  | 6.121 | -0.769  | 1.706 |                   |       |           |       | 0.416     | 0.404 |
| Mixed Dev. Cover                             | -1.608    | 0.989 |         |       |         |       | 4.57              | 4.516 | 2.736     | 3.439 |           |       |
| R <sup>2</sup>                               | 0.796     |       | 0.824   |       | 0.417   |       | 0.375             |       | 0.443     |       | 0.356     |       |
| <b>Model with only county dummy variable</b> |           |       |         |       |         |       |                   |       |           |       |           |       |
| R <sup>2</sup>                               | 0.606     |       | 0.331   |       | 0.156   |       | 0.114             |       | 0.090     |       | 0.149     |       |
| <b>Model with only year dummy variable</b>   |           |       |         |       |         |       |                   |       |           |       |           |       |
| R <sup>2</sup>                               | 0.045     |       | 0.018   |       | 0.028   |       | 0.139             |       | 0.007     |       | 0.010     |       |

1009  
 1010  
 1011

1012 **Table 3.** Observed and estimated total Lyme disease incidence for 2008 – 2017 (i.e. sum of all  
1013 cases within a region across this time period). Hindcasted values were generated using the  
1014 climate and land cover variables included in the best model for each region as well as county  
1015 and year dummy variables. 95% prediction intervals are listed below each estimate. Correlation  
1016 coefficients indicate the similarity between the estimated and observed Lyme disease incidence  
1017 for a given county and year.  
1018

|                   | Observed | Upper climate change scenario (RCP 8.5) |                         | Moderate climate change scenario (RCP 4.5) |                         |
|-------------------|----------|-----------------------------------------|-------------------------|--------------------------------------------|-------------------------|
|                   |          | Hindcasted                              | Correlation coefficient | Hindcasted                                 | Correlation coefficient |
| Northeast         | 205664   | 205664<br>[99607, 311721]               | 0.862                   | 205664<br>[98451, 312877]                  | 0.859                   |
| Midwest           | 107110   | 107110<br>[17494, 196726]               | 0.898                   | 107110<br>[17201, 197019]                  | 0.897                   |
| Pacific           | 898      | 818<br>[-404, 2039]                     | 0.512                   | 847<br>[-438, 2133]                        | 0.513                   |
| Pacific Southwest | 678      | 678<br>[-1612, 2968]                    | 0.343                   | 678<br>[-1611, 2967]                       | 0.344                   |
| Southwest         | 1598     | 1680<br>[-5129, 8489]                   | 0.335                   | 1602<br>[-5229, 8433]                      | 0.346                   |
| Southeast         | 4677     | 4265<br>[-5795, 14505]                  | 0.494                   | 4348<br>[-6428, 15125]                     | 0.493                   |

1019  
1020

1021 **Table 4.** Predicted change in the number of Lyme disease cases, relative to hindcasted 2010 –  
1022 2020 levels, for each region under upper and moderate climate change scenarios. Point estimates  
1023 and 95% prediction intervals are shown.  
1024

|                      | Upper climate change scenario<br>(RCP 8.5) |                      | Moderate climate change scenario<br>(RCP 4.5) |                     |
|----------------------|--------------------------------------------|----------------------|-----------------------------------------------|---------------------|
|                      | 2040 - 2050                                | 2090 - 2100          | 2040 – 2050                                   | 2090 - 2100         |
| Northeast            | 19625 [-209, 39460]                        | 29813 [8311, 51315]  | 12915 [-7053, 32884]                          | 25565 [4697, 46434] |
| Midwest              | -2566 [-10597, 5465]                       | -3432 [-12688, 5823] | 2554 [-5254, 10362]                           | 8872 [-66, 17810]   |
| Pacific              | 27 [-134, 189]                             | 59 [-150, 268]       | -8 [-162, 146]                                | -18 [-193, 156]     |
| Pacific<br>Southwest | -13 [-1343, 1317]                          | -25 [-1406, 1357]    | -42 [-1345, 1260]                             | -164 [-1539, 1211]  |
| Southwest            | -16 [-764, 731]                            | -34 [-787, 718]      | -27 [-778, 723]                               | -56 [-814, 702]     |
| Southeast            | 614 [-275, 1504]                           | 1248 [252, 2244]     | 4 [-900, 909]                                 | -15 [-960, 930]     |
| US Total             | 17672 [-13322 48666]                       | 27630 [-6468, 61727] | 15395 [-15493, 46284]                         | 34183 [1124, 67243] |

1025  
1026  
1027

1028

a

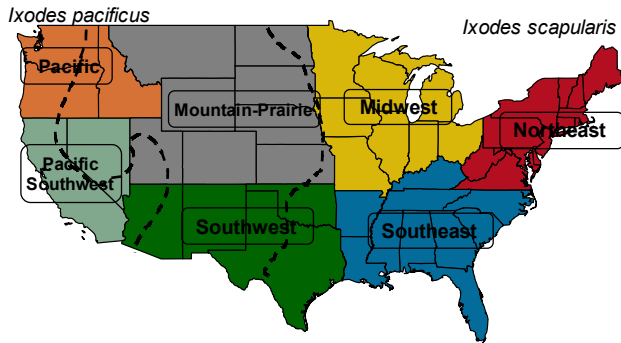

b Lyme disease incidence 2000 - 2017

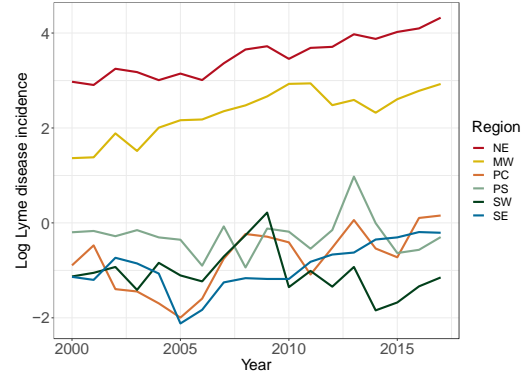

1029

1030

1031 **Figure 1. a)** Regional boundaries designated by US Fish & Wildlife Service. These regions were  
1032 used to analyze spatial variation in the effects of climate conditions on disease outcomes. Map  
1033 recreated from: <https://www.fws.gov/endangered/regions/index.html>. Dashed black lines denote  
1034 the approximate eastern boundary of *Ixodes pacificus* and western boundary of *Ixodes*  
1035 *scapularis*, respectively, based on distribution maps created by the CDC. **b)** Regional time  
1036 series of log Lyme disease incidence (the number of cases per 100,000 people in the  
1037 population) from 2000 – 2017. The Mountain Prairie region is not shown here as it was removed  
1038 from the analysis due to low vector presence.

1039

1040

1041

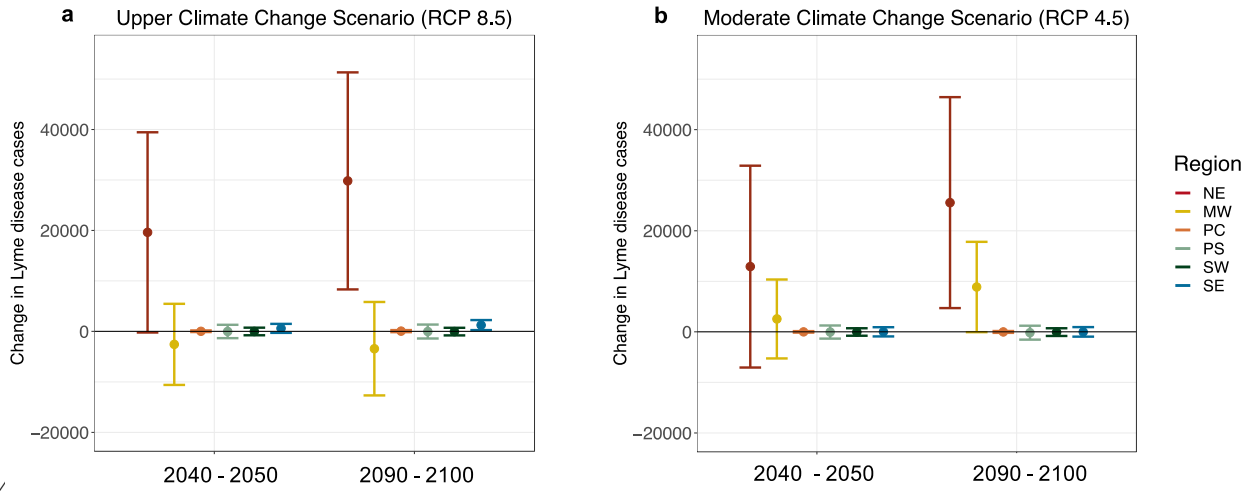

1042

1043

1044

1045

1046

1047

1048

1049

1050

1051

1052

1053

1054

**Figure 2.** Predicted change in Lyme disease cases by region for 2040 – 2050 and 2090 – 2100 under the **a)** upper and **b)** moderate climate change scenarios. Case changes refer to raw case counts rather than incidence and indicate the average change in cases for a particular decade relative to hindcasted values for 2010 – 2020. Bars represent 95% prediction intervals. Regions are defined in Fig. 1.

1055

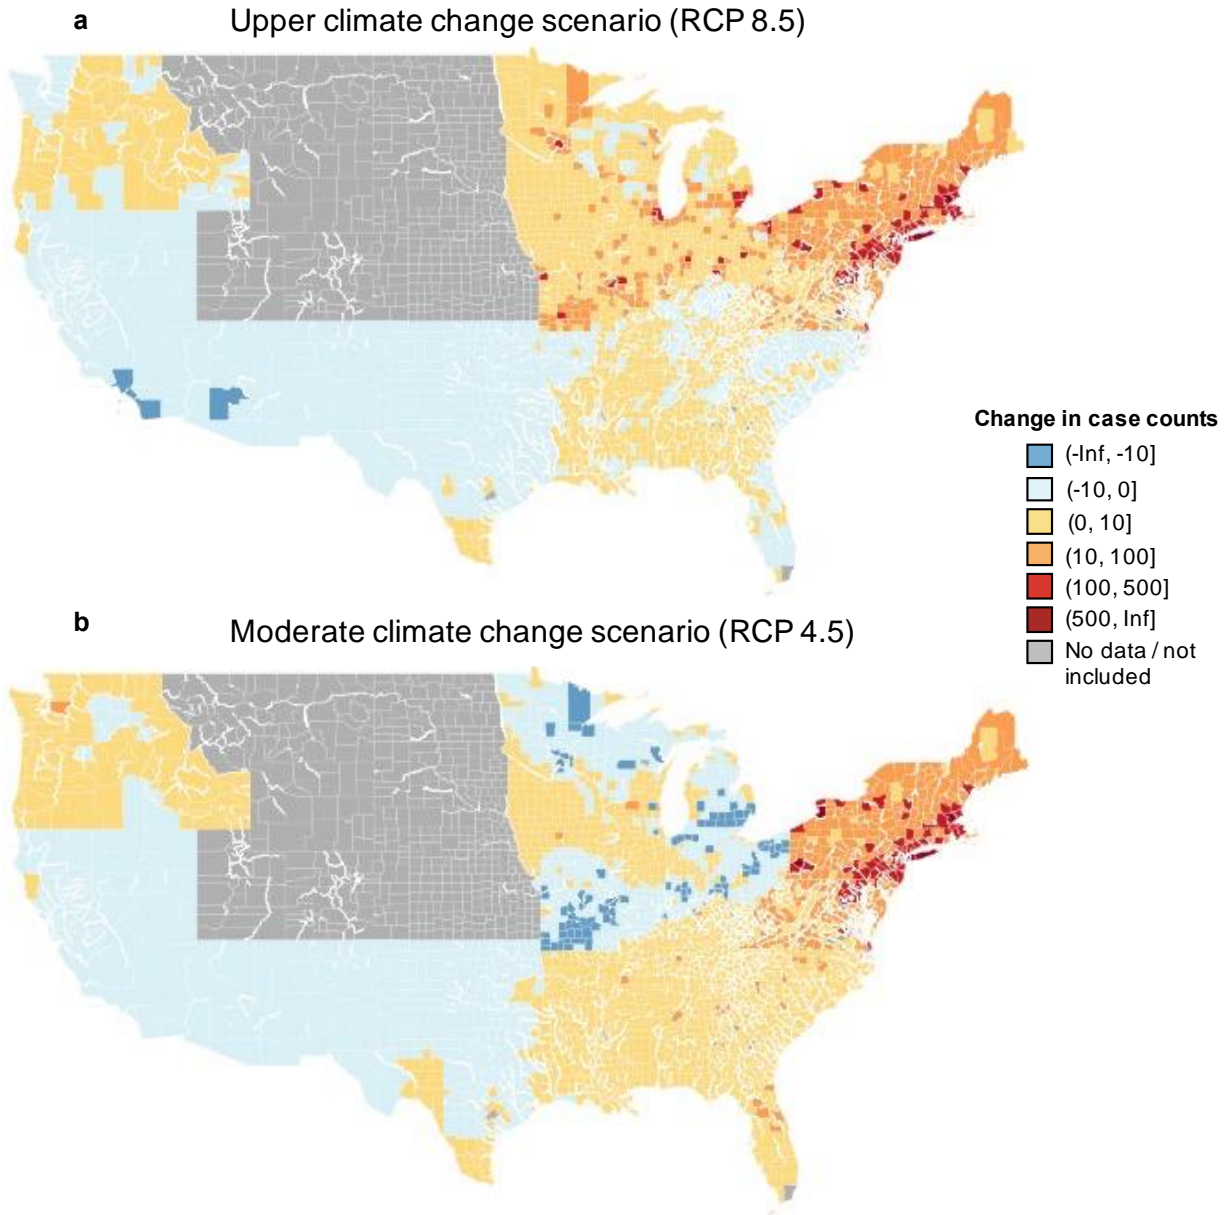

1056

1057

1058 **Figure 3.** Predicted change in Lyme disease cases for 2100 shown at the county level under

1059 the **a)** upper and **b)** moderate climate change scenarios. Case changes refer to raw case counts

1060 rather than incidence and are relative to hindcasted values for 2010 – 2020. All counties within

1061 the Mountain Prairie are shown in gray as this region was not included in the analysis. Other

1062 counties shown in gray (n = 49) containing missing disease, land cover or climate data.

1063

1064
